# Supplementary material for: Cohort study evaluating management of burns in the community in clinical practice in the UK: costs and outcomes
Source: PubMed Central journal article supplement — BMJ Open. 2020 Apr 8;10(4):e035345. doi: 10.1136/bmjopen-2019-035345 (PMC7245389; doi:10.1136/bmjopen-2019-035345), 2020-04-08
Supplement: bmjopen-2019-035345.draft_revisions.pdf [file bmjopen-2019-035345.draft_revisions.pdf]

# BMJ Open

BMJ Open is committed to open peer review. As part of this commitment we make the peer review history of every article we publish publicly available.

When an article is published we post the peer reviewers' comments and the authors' responses online. We also post the versions of the paper that were used during peer review. These are the versions that the peer review comments apply to.

The versions of the paper that follow are the versions that were submitted during the peer review process. They are not the versions of record or the final published versions. They should not be cited or distributed as the published version of this manuscript.

BMJ Open is an open access journal and the full, final, typeset and author-corrected version of record of the manuscript is available on our site with no access controls, subscription charges or pay-per-view fees (<http://bmjopen.bmj.com>).

If you have any questions on BMJ Open's open peer review process please email [info.bmjopen@bmj.com](mailto:info.bmjopen@bmj.com)

# BMJ Open

## A COHORT STUDY EVALUATING MANAGEMENT OF BURNS IN THE COMMUNITY IN CLINICAL PRACTICE IN THE UK: COSTS AND OUTCOMES

|                               |                                                                                                                                                                |
|-------------------------------|----------------------------------------------------------------------------------------------------------------------------------------------------------------|
| Journal:                      | <i>BMJ Open</i>                                                                                                                                                |
| Manuscript ID                 | bmjopen-2019-035345                                                                                                                                            |
| Article Type:                 | Original research                                                                                                                                              |
| Date Submitted by the Author: | 28-Oct-2019                                                                                                                                                    |
| Complete List of Authors:     | Guest, Julian F.; Catalyst Consultants; King's College London, Fuller, Graham; Catalyst Consultants Edwards, Jacky; Manchester University NHS Foundation Trust |
| Keywords:                     | HEALTH ECONOMICS, TRAUMA MANAGEMENT, WOUND MANAGEMENT                                                                                                          |
|                               |                                                                                                                                                                |

SCHOLARONE™  
Manuscripts

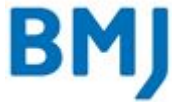

I, the Submitting Author has the right to grant and does grant on behalf of all authors of the Work (as defined in the below author licence), an exclusive licence and/or a non-exclusive licence for contributions from authors who are: i) UK Crown employees; ii) where BMJ has agreed a CC-BY licence shall apply, and/or iii) in accordance with the terms applicable for US Federal Government officers or employees acting as part of their official duties; on a worldwide, perpetual, irrevocable, royalty-free basis to BMJ Publishing Group Ltd ("BMJ") its licensees and where the relevant Journal is co-owned by BMJ to the co-owners of the Journal, to publish the Work in this journal and any other BMJ products and to exploit all rights, as set out in our [licence](#).

The Submitting Author accepts and understands that any supply made under these terms is made by BMJ to the Submitting Author unless you are acting as an employee on behalf of your employer or a postgraduate student of an affiliated institution which is paying any applicable article publishing charge ("APC") for Open Access articles. Where the Submitting Author wishes to make the Work available on an Open Access basis (and intends to pay the relevant APC), the terms of reuse of such Open Access shall be governed by a Creative Commons licence – details of these licences and which [Creative Commons](#) licence will apply to this Work are set out in our licence referred to above.

Other than as permitted in any relevant BMJ Author's Self Archiving Policies, I confirm this Work has not been accepted for publication elsewhere, is not being considered for publication elsewhere and does not duplicate material already published. I confirm all authors consent to publication of this Work and authorise the granting of this licence.

**ORIGINAL ARTICLE****A COHORT STUDY EVALUATING MANAGEMENT OF BURNS IN THE  
COMMUNITY IN CLINICAL PRACTICE IN THE UK:  
COSTS AND OUTCOMES****Julian F Guest<sup>1,2</sup>, Graham W Fuller<sup>1</sup>, Jacky Edwards<sup>3</sup>****<sup>1</sup> Catalyst Health Economics Consultants, Rickmansworth, UK****<sup>2</sup> Faculty of Life Sciences and Medicine, King's College, London, UK****<sup>3</sup> Manchester Foundation Trust, Manchester, UK****Correspondence to:**

Professor Julian F Guest

CATALYST Health Economics Consultants

7 Gilham Court

Ebury Road

Rickmansworth

Hertfordshire WD3 1FZ

UK

Tel: +44 (0) 1923 450045

E-mail: julian.guest@catalyst-health.com

**Running title:** Health economic impact of burns in the UK**Keywords:** Burden; burns; cost; wounds; UK.

## ABSTRACT

**Objective:** To evaluate health outcomes, resource use and corresponding costs attributable to managing burns in clinical practice, from initial presentation, among a cohort of adults in the UK.

**Methods:** This was a retrospective cohort analysis of the records of a randomly selected cohort of 260 patients from the THIN database who had 294 evaluable burns. Patients' characteristics, wound-related health outcomes and health care resource use were quantified, and the total National Health Service (NHS) cost of patient management was estimated at 2017/2018 prices.

**Results:** Diagnosis was incomplete in 63% of the records since the location, thickness and size of the burns was missing. Overall, 70% of all the burns healed within 24 months and the time to healing among the healed wounds was a mean of 7.8 months per burn. Sixty-six per cent of burns were initially managed in the community and the other 34% were managed at Accident and Emergency departments. Patients' wounds were subsequently managed predominantly by practice nurses and hospital outpatient clinics. Fifty-five percent of burns were treated with dressings and the other 45% had no documented dressing in the patients' records. The mean NHS cost of wound care in clinical practice over 24 months from initial presentation was an estimated £16,924 per burn, ranging from £12,002 and £40,577 for a healed and unhealed wound, respectively.

**Conclusion:** This study indicates the need for education of general practice clinicians on the management and care of burn wounds. Furthermore, it is beholden on the burns community to determine how the poor healing rates can be improved. Clinical and economic benefits to both patients and the NHS could accrue from strategies that focus on improving documentation in patients' records, the integration of care between different providers, wound healing rates and reducing infection.

## STRENGTHS AND LIMITATIONS OF THIS STUDY

- This is the first study to evaluate patient pathways and associated health outcomes, resource use and corresponding costs attributable to managing burns across both primary and secondary care over 24 months from initial presentation.
- This study undertaken using real world evidence derived from the anonymised records of a sample of patients in The Health Improvement Network (THIN) database (a nationally representative database of clinical practice among >11 million patients registered with general practitioners in the UK).
- The estimates were derived following a systematic analysis of patients' characteristics, wound-related health outcomes and all primary and secondary care resource use contained in the patients' electronic records.
- Computerised information in the THIN database is collected by general practitioners for clinical care purposes and not for research, consequently the accuracy of wound descriptors and other terminology have not been validated, but does reflect real world documentation in clinical practice.
- The analysis does not consider the potential impact of those wounds that remained unhealed beyond the study period.

1  
2  
3  
4  
5  
6  
7  
8  
9  
10  
11  
12  
13  
14  
15  
16  
17  
18  
19  
20  
21  
22  
23  
24  
25  
26  
27  
28  
29  
30  
31  
32  
33  
34  
35  
36  
37  
38  
39  
40  
41  
42  
43  
44  
45  
46  
47  
48  
49  
50  
51  
52  
53  
54  
55  
56  
57  
58  
59  
60

**FUNDING**

There is no funding to report and the views expressed in this article are those of the authors

**COMPETING INTERESTS**

None declared.

For peer review only

## CONTRIBUTORS

J.F.G. designed the study, managed the analyses, performed some analyses, checked all the other analyses, and wrote the manuscript.

G.W.F. conducted much of the analyses.

J.E. scrutinised the analyses, suggested further analyses and helped interpret some of the findings.

All the authors were involved in revising the manuscript and gave final approval. J.F.G. is the guarantor of this work and, as such, had full access to all the data in the study and takes responsibility for the integrity of the data and the accuracy of the data analysis.



## **ETHICS APPROVAL**

Ethics approval to use anonymised patients' records from the THIN database for this study was obtained from the Research Ethics Committee that appraises studies using the THIN database (reference number 13-061).

## **DATA SHARING STATEMENT**

The THIN data set cannot be shared as this restriction was a condition of the ethics approval obtained from the Research Ethics Committee (reference number 13-061). Questions concerning the data underlying the results can be sent to the Corresponding Author.

## INTRODUCTION

Burns are a serious pathology, potentially leading to severe morbidity and significant mortality. [1]. They can also be among the most expensive traumatic injuries to manage, generating a substantial health-economic impact [1, 2]. In 2012/13 the UK's National Health Service managed an estimated 87,000 burns (excluding chemical and electrical burns) among adults at a cost of £90 million [3, 4]. In that year, there were approximately 20,000 adult burns-related admissions into hospitals in England, of which 20% of descriptions lacked specificity [5]. In 2017/18, this increased to 23,500 adult burns-related admissions into hospitals in England, of which 30% of descriptions lacked specificity [5]. Globally, millions of individuals suffer from burn-related injuries each year [6], and up to 200,000 people die from these injuries, the majority of which occur in low- and middle-income countries [7, 8].

In addition to the economic impact, burns-related injuries can result in functional, psychological and social effects on both survivors and their families. Moreover, non-fatal burns are a leading cause of morbidity, disfigurement and disability, often leading to social stigma and rejection [8]. There are multiple strategies for managing burns and the associated impact on patient physiology, with new care pathways and technology being introduced on a regular basis [9-12].

A clinician's treatment of choice should be tailored to each patient using updated high quality scientific evidence [13, 14]. Nevertheless, despite the increasing numbers of published randomised controlled trials in burn care, systematic reviews have not provided sufficient evidence to support many commonly used interventions or management strategies [15-17]. Patients who experience a burn represent a heterogeneous population, with variations in age, mechanism of injury, depth, site and size of burn. Hence, selecting the most important outcomes to measure in burn care is challenging [18, 19]. Moreover, the follow-up period at which outcomes are measured may also determine the metrics to be assessed, which can include healing time, skin-graft loss, infection rates as well as functional, cosmetic and psychological issues [20].

Despite this, there is negligible published evidence on the presentation and management of burns in clinical practice across the primary and secondary care sectors in the UK. Accordingly, the objective of the present analysis was to follow a cohort of adult patients in clinical practice

1  
2  
3 from initial presentation of their burn to evaluate in greater depth how patients are managed  
4 and its impact on healing and NHS costs  
5  
6  
7  
8  
9  
10  
11  
12  
13  
14  
15  
16  
17  
18  
19  
20  
21  
22  
23  
24  
25  
26  
27  
28  
29  
30  
31  
32  
33  
34  
35  
36  
37  
38  
39  
40  
41  
42  
43  
44  
45  
46  
47  
48  
49  
50  
51  
52  
53  
54  
55  
56  
57  
58  
59  
60

For peer review only

## METHODS

### Study Design

This was a retrospective cohort analysis of the case records of adult patients with a burn randomly extracted from The Health Improvement Network (THIN) database. The perspective of the analysis was that of the UK's NHS and the time horizon was 24 months from initial presentation in the community.

### THIN Database

The THIN database contains electronic records on >11 million anonymised patients entered by general practitioners (GPs) from >560 practices across the UK. The patient composition within the THIN database has been shown to be representative of the UK population in terms of demographics and disease distribution [21] and the database theoretically contains patients' entire medical history, as previously described [3]. Hence, the information contained in the THIN database reflects actual clinical practice, although potentially some community records may not be linked to GP records.

(THIN is a registered trademark of Cegedim SA in the United Kingdom and other countries. Reference made to the THIN database is intended to be descriptive of the data asset licensed by IQVIA).

### Study Population

The authors had previously obtained a random sample of records of 6,000 adult patients with a documented history of a wound for whatever reason from the THIN database, for previous wound studies. The study population of 260 patients was identified within this cohort of 6,000 patients according to the following criteria:

- Were 18 years of age or over.
- Had a Read code for a burn including a scald either during or after 2012.
- Had continuous medical history in their case record from the first mention of their wound unless it healed.

- Patients with a chemical or electric burn were excluded from the data set, and so too were those with sunburn.
- Patients with a dermatological tumour were also excluded from the data set.
- Any patients with a burn who died within two years of initial presentation were also excluded, since the study design was to examine the trajectory of these wounds over a full 24 months from initial presentation unless it healed.

### **Patient and Public Involvement**

Patients and members of the public were not directly involved in this study. The study population was limited to the anonymised records of patients in the THIN database.

### **Study Variables and Statistical Analyses**

Information was systematically extracted from the patients' electronic records over a period of 24 months from initial presentation. This included patients' characteristics, comorbidities (defined as a non-acute condition that patients were suffering from in the year before their burn), wound-related healthcare resource use (i.e. dressings, bandages, topical treatments, district nurse visits (who provide care within a patient's home), practice nurse visits (who provide care within a GP's surgery), GP visits, hospital outpatient visits, hospital admissions, laboratory tests, prescribed medication (i.e. analgesics, non-steroidal anti-inflammatory drugs (NSAIDs) and systemic anti-infectives (principally antibiotics)) and clinical outcomes (i.e. healing and putative infection). No assumptions were made regarding missing data and there were no interpolations.

Differences between two subgroups were tested for statistical significance using a Mann-Whitney U test or  $\chi^2$  test. Differences between three subgroups were tested for statistical significance using a Kruskal-Wallis test or  $\chi^2$  test. Binary logistic regression investigated relationships between baseline variables and clinical outcomes. Kaplan-Meier analyses were undertaken to compare the healing distribution of different subgroups. The p values  $<0.05$  were considered statistically significant and have been reported. All p values  $\geq 0.05$  were not considered to be statistically significant and these numerical values have not been reported. All statistical analyses were performed using IBM SPSS Statistics (IBM UK).

## Cost of Patient Management

The NHS cost of wound care for each patient was estimated by assigning unit costs at 2017/2018 prices [22-24] to the quantity of healthcare resource used by individual patients. The mean cost of utilisation of each healthcare resource was then combined in order to estimate the mean NHS cost of managing a burn over 24 months from initial presentation. Accordingly, the study only considers the cost of wound management and does not estimate patients' overall healthcare costs.

## Sensitivity Analyses

Deterministic sensitivity analyses were undertaken to assess how the cost of managing a burn changes by varying the values of clinical outcomes and resource use.

## RESULTS

### Patients' Characteristics

The study population comprised the anonymised case records of a randomly selected cohort of 260 adult patients from the THIN database who had a burn. According to the records, 26 of these patients had 2 or more burns, resulting in 294 evaluable burns.

The patients' age in the data set was a mean of  $57.8 \pm 18.4$  years per patient, and 61% were female. Patients had a mean of 4.7 comorbidities and 30% of patients had diabetes. Characterisation of the burns in the patients' records was poor since 63% of them lacked documentary evidence of location, thickness and size. Patients' baseline characteristics are summarised in Table 1.

Seventeen percent of the wounds were documented as being either scalds or hand burns. An estimated 30% of these burns occurred in the spring and <20% occurred in the summer months. The other wounds occurred with a greater frequency in the winter and spring months.

### Clinical outcomes

In accordance with the study's inclusion criteria, all the patients in our data set survived the period of 24 months following initial presentation. Forty-six per cent of all the burns healed within 12 months and a further 24% by 24 months (a total of 70% healed within 24 months; Figure 1), and the time to healing among the healed wounds was a mean of 7.8 months per burn. There were minimal differences in the comorbidity profile between patients whose wound healed and those that remained unhealed. However, >25% of patients with a documented scald or hand burn had an ophthalmological comorbidity compared with 16% of patients with other wounds ( $p < 0.03$ ).

### Patient Management

According to the records, 66% of burns were initially managed in the community at a patient's general practice before being referred to a hospital outpatient clinic. The other 34% were managed at Accident and Emergency departments. Of the patients who were managed at

1  
2  
3 Accident and Emergency departments 15% were subsequently admitted into hospital (of which  
4 1% underwent surgery) and 19% were managed as outpatients. Over the 24 months from the  
5 burn injury, patients were predominantly managed by practice nurses and seen in a hospital  
6 outpatient clinic between 1 and 4 times a month until the wound healed. Ongoing resource use  
7 after initial presentation is summarised in Table 2.  
8  
9  
10  
11  
12

13 Fifty-five percent of the burns were treated with dressings and the other 45% had no  
14 documented evidence in the patients' records of dressings having been used. Table 5  
15 summarises the dressings that were prescribed. Up to 41% of burns were treated with multiple  
16 dressings (mean of 2.7 dressings per burn). Documentation in the patients' records suggests  
17 that patients would receive a dressing in a hospital outpatient clinic, but after subsequent  
18 attendance at their general practice they would either receive a combination of dressings or no  
19 dressings at all. Furthermore, the percentage of patients who received multiple dressings  
20 increased the longer the patient had their wound (Figure 2).  
21  
22  
23  
24  
25  
26  
27  
28

### 29 **Cost of Patient Management**

30  
31  
32 The mean NHS cost of wound care in clinical practice over 24 months was an estimated  
33 £16,924 per burn. However, the cost of managing an unhealed burn was significantly more  
34 than that of managing a healed burn (£12,002 versus £40,577;  $p < 0.001$ ) (Table 4). Hospital  
35 admissions were the primary cost driver and accounted for 52% of the cost of wound  
36 management. Hospital outpatient visits and general practice visits were the secondary cost  
37 drivers accounting for 15% and 12% respectively. Dressings and bandages accounted for up to  
38 6% of the cost of wound management. Of the total NHS cost of managing a burn, 27% was  
39 incurred in the community and the remainder in secondary care. Furthermore, the distribution  
40 of costs was unaffected by whether the wound healed. Figure 3 illustrates how the monthly  
41 cost of wound management decreased for both healed and unhealed burns.  
42  
43  
44  
45  
46  
47  
48  
49  
50

### 51 **Infection**

52  
53  
54 Forty percent of the burns had no documented evidence of infection in the records. The other  
55 60% of burns were treated with either an antimicrobial dressing or systemic antibiotic or a  
56 combination of both (Table 5). The healing rate was similar among infected and non-infected  
57 wounds. However, the time to healing was substantially longer among those burns that were  
58  
59  
60



1  
2  
3 recorded as having some evidence of infection and the cost of wound management increased  
4 accordingly (Table 5).  
5  
6  
7

8 Kaplan-Meier analyses demonstrated that the time to healing distribution was significantly  
9 different between wounds with no documented evidence of infection and those with a putative  
10 infection ( $p < 0.001$ ) even though there was no significant difference in the overall probability  
11 of being healed by 24 months (Figure 4).  
12  
13  
14  
15

### 16 **Body Mass Index (BMI)**

17  
18  
19  
20 The healing rate increased in parallel with increasing BMI, and so too did the cost of wound  
21 management (Table 6). Kaplan-Meier analyses demonstrated that the time to healing  
22 distribution was not significantly different between patients with a different BMI ( $p = 0.191$ ),  
23 and even though the probability of healing among those with a BMI  $\geq 20\text{kg/m}^2$  was at least  
24 double that of those with a BMI  $< 20\text{kg/m}^2$ , the Odds ratio did not reach statistical significance.  
25  
26  
27  
28  
29

### 30 **Sensitivity Analyses**

31  
32  
33  
34 Sensitivity analysis showed that if the probability of healing was reduced by 25%, from 70%  
35 to 53%, the mean NHS cost of wound care over 24 months would increase by 24% to an  
36 estimated £20,920 per wound. Conversely, if the probability of healing was increased by 25%,  
37 from 70% to 88%, the mean NHS cost of wound care over 24 months would decrease by 19%  
38 to an estimated £12,693 per wound.  
39  
40  
41  
42  
43

44  
45 If the number of hospital admissions changed by 25% below or above the base case value, the  
46 mean NHS cost of wound care over 24 months would vary by 14% from the mean value (range  
47 £14,591–19,257 per burn). However, if the number of hospital outpatient visits changed by  
48 25% below or above the base case value, the mean NHS cost of wound care over 24 months  
49 would vary by 4% from the mean value (range £16,266–17,582 per burn) and if the number of  
50 general practice visits changed by 25% below or above the base case value, the mean NHS cost  
51 of wound care would vary by 3% from the mean value (range £16,412–17,436 per burn). If the  
52 unit cost of wound care products was decreased or increased by 25%, the mean NHS cost of  
53 wound care over 24 months would only vary by 1% from the mean value (range £16,684–  
54  
55  
56  
57  
58  
59  
60

1  
2  
3 17,164 per burn). Changes to other model inputs had a minimal impact on the mean NHS cost  
4 of wound care in clinical practice.  
5  
6  
7  
8  
9  
10  
11  
12  
13  
14  
15  
16  
17  
18  
19  
20  
21  
22  
23  
24  
25  
26  
27  
28  
29  
30  
31  
32  
33  
34  
35  
36  
37  
38  
39  
40  
41  
42  
43  
44  
45  
46  
47  
48  
49  
50  
51  
52  
53  
54  
55  
56  
57  
58  
59  
60

For peer review only

## DISCUSSION

This study aimed to investigate fire-related burns and scalds, hence those with a chemical or electric burn were excluded from the analysis. The study population of 260 adult patients with 294 evaluable burns may not necessarily be representative of the total adult population with a burn in the UK. Nevertheless, this study has provided insights into the way patients are managed across different services that has been difficult to ascertain from other published studies.

Burn injury can be one of the most severe forms of trauma and to achieve the best possible clinical outcome, burn care must be delivered by expert multi-disciplinary teams in specialised burns services [25]. In the UK there is significant variation in the way burns are managed and followed-up by burns services. Some services will regularly review the patient in their own clinics until the wound is healed, whereas other services will either teach patients to undertake self-care or utilise a shared-care model with either the community nursing team or practice nurses. Hence, very few patients with a burn wound are managed exclusively by practice nurses. This is consistent with the findings from this study which found that nearly all the patients were jointly managed in both hospital outpatient clinics and by their general practice. Additionally, over the study's follow-up period of 24 months, 32% of all the burns resulted in a hospital admission. Notwithstanding this, there was minimal evidence of a coordinated shared treatment plan between primary and secondary care. Documentation in the patients' records suggests that in the majority of instances, the dressings patients received in a hospital outpatient clinic were changed by clinicians in general practice and they would often be switched from a single to multiple dressings or no dressings at all. The goals of local burns wound management are the prevention of desiccation of viable tissue and control of bacteria through moist wound healing [26]. Hence, dressings removed by practice nurses are often reinstated in specialist clinics. One of the challenges to improving burns care in the community is the variable extent to which employers release and fund training and development of practice nurses [27]. Consequently, this study's wounds may have taken longer to heal if wound care was not the primary area of expertise of the nurses caring for these patients in the community. A series of Link Nurse Frameworks for burns has been developed across the Burn Operational Delivery Networks. However, despite their in-reach into both emergency departments and community nurses, very little impact has been made on practice nurses as access to these healthcare professionals has proved difficult [28]. Clearly, improving integration in management practices

1  
2  
3 between secondary and primary care should lead to a better outcome for patients and would be  
4 cost-effective for the NHS.  
5  
6  
7

8 The severity of a burn relates to both the depth of skin involvement and the percentage of the  
9 total body surface area (TBSA) involved [29]. Hence, the lack of documentation pertaining to  
10 diagnosis was particularly worrying. An estimated 63.2% of the records lacked a specific burn  
11 or scald location, thickness and size, 34.7% only specified location but not thickness and size  
12 and another 1.7% specified thickness but not location and size. Consequently, any reporting  
13 system based on patients' records in primary care or the community would lead to an under-  
14 reporting and be inaccurate.  
15  
16  
17  
18  
19

20  
21  
22 The patients in this study seemed to have had significantly more comorbidities than the burn  
23 patients in the International Burn Injury Database [30], and that may have contributed to the  
24 length of time taken for their wounds to have healed. It is unusual for GPs to become involved  
25 with the management of a burn wound, and this may be due to this cohort being more at risk  
26 due to their comorbidities. Nevertheless, there is still an issue surrounding lack of burn care  
27 education among primary care clinicians. Moreover, 60% of all the burns in this cohort were  
28 considered to be infected or at risk of infection, based on documentation in the patients'  
29 records. Wound infections are one of the most serious problems that occur in the acute phase  
30 after a burn injury [31]. Several factors contribute to infection in burn wounds, notably the  
31 destruction of the skin barrier, the presence of necrosis and serosanguinous exudate, and  
32 impaired immune function [32]. Only superficial burn wounds will heal with minimal risk of  
33 infection; all other depths have the potential for colonisation and, thus, infection [31]. The risks  
34 are commensurate with the depth and extent of the burn, the health and age of the patient and  
35 local perfusion of the tissues. Local burn wound management is one of the most important  
36 aspects of burn therapy after the emergency treatment phase and can have considerable  
37 influence on time to healing [33]. For this reason, deeper wounds should always be managed  
38 with antimicrobials to prevent infection. Church *et al* 2006 argue that widespread application  
39 of an effective topical antimicrobial agent substantially reduces the microbial load on the open  
40 burn wound surface and reduces the risk of infection [34]. In the majority of burn units in the  
41 UK, antibiotics are not routinely prophylactically administered to burn patients because of  
42 concerns regarding antibiotic resistance, high cost, and the risk of adverse drug effects [32].  
43 However, they are routinely given to patients with burn injuries by either emergency  
44 departments or GPs as there is a lack of understanding of the normal inflammatory process of  
45  
46  
47  
48  
49  
50  
51  
52  
53  
54  
55  
56  
57  
58  
59  
60

1  
2  
3 a burn. In this cohort, only 21% of all the burns were treated with an antimicrobial dressing at  
4 some point during the study's follow-up period. Consequently, the antimicrobial use may have  
5 been appropriate, but without adequate assessment of depth, a judgement cannot be made.  
6  
7 Furthermore, there was no documentary evidence of 45% of patients ever having received a  
8 dressing for their wound, although there is no consensus on which agent or dressing is optimal  
9 for burn wound coverage to prevent or control infection or to enhance wound healing [35, 36].  
10  
11  
12  
13  
14

15 Resource use associated with managing a putatively infected wound was found to be greater  
16 than that of an uninfected wound as the time to healing was longer. So too was resource use  
17 associated with managing the wounds that remained unhealed compared with those that went  
18 on to heal. Consequently, the cost of managing an unhealed wound was at least three time more  
19 than that of managing a healed wound (mean of £12,000 vs £40,600 per wound), and the cost  
20 of managing an uninfected wound was at least 80% less than that of a putatively infected  
21 wound. These findings are consistent with our Burden of Wounds study [3, 4, 37]. The time to  
22 healing a wound is clearly an important factor in driving costs. Accordingly, the cost of burns  
23 wound management can be affected by a combination of resources required for dressing  
24 changes, complexity of some treatment regimens and infection. It is also noteworthy that the  
25 healing rate was higher among patients with a higher BMI, which was contrary to the healing  
26 rate among a cohort of patents with unhealed surgical wounds [38].  
27  
28  
29  
30  
31  
32  
33  
34  
35  
36  
37

38 This study provided insights into areas where improvements in clinical and service  
39 management could potentially enhance healing and other patient outcomes while reducing  
40 overall management costs. These are:  
41

- 42 • Working to common definitions and reporting standards across primary and secondary  
43 care.
  - 44 • Integrating care across providers.
  - 45 • Rational use of products with access to advanced wound treatments when necessary.
  - 46 • Recognising comorbidity management as appropriate.
- 47  
48  
49  
50  
51  
52  
53

54 In turn, with improved healing, these actions should reduce workload and associated healthcare  
55 resource use and lead to reductions in the overall cost of wound care. All healthcare systems  
56 recognise the importance of managing patients with burns and the relative risk of developing  
57 an infection. Clearly, training non-specialist nurses in the appropriate management of burns  
58  
59  
60

1  
2  
3 wound care is a prerequisite to overcoming some of the problems encountered in clinical  
4 practice and to achieving better health outcomes than those currently being observed.  
5  
6

7  
8 Forty-six per cent of all the burns in this study had healed by 12 months from the time of the  
9 injury. In comparison, we previously estimated that 53% of venous leg ulcers (VLUs) [39],  
10 35% of diabetic foot ulcers (DFUs) [40], 50% of community-acquired pressure ulcers (PU)  
11 (ranging from 100% for category 1 ulcers to 21% for category 4 ulcers) [41] and 83% of  
12 surgical wounds [38] healed within 12 months from the onset of community management. The  
13 12-monthly cost of a wound that healed was £3,000, £2,100, £5,100 and £6,000 for a VLU,  
14 DFU, community-acquired PU and surgical wound respectively [38-41], compared with  
15 £8,800 for a healed burn. Additionally, the 12-monthly cost of a wound that remained healed  
16 by 12 months was £13,500, £8,800, £12,300 and £13,700 for a VLU, DFU, community-  
17 acquired PU and surgical wound respectively [38-41], compared with £26,700 for an unhealed  
18 burn. The higher burn-associated costs reflect the higher proportion of these injuries that result  
19 in a hospital admission and the majority of the burns being managed in both hospital outpatient  
20 clinics as well as by community-based teams.  
21  
22  
23  
24  
25  
26  
27  
28  
29  
30

### 31 **Study Limitations**

32  
33 The advantages and disadvantages of using patients' records in the THIN database for health  
34 economic studies in wound care have been previously discussed [3]. In summary, the advantage  
35 of using the database is that the patient pathways and associated resource use are based on real-  
36 world evidence derived from clinical practice. However, the analyses were based on clinicians'  
37 entries into their patients' records and inevitably subject to a certain amount of imprecision and  
38 lack of detail. Moreover, the computerised information in the database is collected by GPs and  
39 nursing teams for clinical care purposes and not for health economics research. Prescriptions  
40 issued by GPs and practice nurses are recorded in the database, but it does not specify whether  
41 the prescriptions were dispensed or detail patient compliance with the product. There may also  
42 be an under-recording of community-based clinician visits outside of the general practice.  
43 Despite these limitations, it is the authors' opinion that the real-world evidence contained in  
44 the THIN database has provided a useful perspective on the management of burns in clinical  
45 practice the UK and the associated costs.  
46  
47  
48  
49  
50  
51  
52  
53  
54  
55  
56  
57  
58  
59  
60

1  
2  
3 The analysis was truncated at 24 months and does not consider the potential impact of those  
4 burns that remained unhealed beyond the study period. The analysis only considered NHS  
5 resource use and associated costs for the ‘average patient’ and was not stratified according to  
6 gender, comorbidities, disease-related factors and level of clinicians’ skills. Costs incurred by  
7 non-NHS organisations (such as the provision of social care), patients’ costs and indirect  
8 societal costs as a result of patients being absent from work were also excluded from the  
9 analysis.  
10  
11  
12  
13  
14  
15  
16

## 17 **Conclusion**

18  
19  
20 The real-world evidence in this study indicates the need to educate general practice clinicians  
21 on the management and care of burns wounds. Furthermore, it is beholden on the burns  
22 community to determine how the poor healing rates can be improved. Clinical and economic  
23 benefits to both patients and the NHS could accrue from strategies that focus on improving  
24 documentation in patients’ records, the integration of care between different providers, wound  
25 healing rates and reducing infection.  
26  
27  
28  
29  
30  
31  
32  
33  
34  
35  
36  
37  
38  
39  
40  
41  
42  
43  
44  
45  
46  
47  
48  
49  
50  
51  
52  
53  
54  
55  
56  
57  
58  
59  
60

## REFERENCES

1. Brusselaers N, Monstrey S, Vogelaers D, Hoste E, Blot S. Severe burn injury in Europe: a systematic review of the incidence, etiology, morbidity, and mortality. *Crit Care*. 2010;14(5):R188. doi:10.1186/cc9300.
2. Nair CKV, Gopinath V, Ashok VG. Demographic and socio-cultural aspects of burns patients admitted in a tertiary care centre. *International Surgery Journal*. 2017;4(7):2170. doi:10.18203/2349-2902.isj20172618.
3. Guest JF, Ayoub N, McIlwraith T, Uchegbu I, Gerrish A, Weidlich D et al. Health economic burden that wounds impose on the National Health Service in the UK. *BMJ Open*. 2015;5(12):e009283. doi:10.1136/bmjopen-2015-009283.
4. Guest JF, Ayoub N, McIlwraith T, Uchegbu I, Gerrish A, Weidlich D et al. Health economic burden that different wound types impose on the UK's National Health Service. *Int Wound J*. 2016. doi:10.1111/iwj.12603.
5. NHS England. Hospital episode statistics: England. <https://digital.nhs.uk/data-and-information/publications/statistical/hospital-admitted-patient-care-activity>.
6. Peck M, Molnar J, Swart D. A global plan for burn prevention and care. *Bull World Health Organ*. 2009;87(10):802-3. doi:10.2471/blt.08.059733.
7. Mock C, Peck M, Peden M, Krug E, Ahuja R, Albertyn H et al. A WHO plan for burn prevention and care. Geneva: World Health Organization; 2008.
8. World Health Organization. Burns Fact Sheet. 2018. <https://www.who.int/news-room/fact-sheets/detail/burns>.
9. Atiyeh BS, Hayek SN, Gunn SW. New technologies for burn wound closure and healing--review of the literature. *Burns*. 2005;31(8):944-56. doi:10.1016/j.burns.2005.08.023.
10. International Best Practice Guidelines: Wound Management in Diabetic Foot Ulcers. *Wounds International*. In: *Wounds International*. 2013. [www.woundsinternational.com](http://www.woundsinternational.com).
11. Rowan MP, Cancio LC, Elster EA, Burmeister DM, Rose LF, Natesan S et al. Burn wound healing and treatment: review and advancements. *Crit Care*. 2015;19:243. doi:10.1186/s13054-015-0961-2.
12. Avita Medical RECELL® System Health Economic Data Project USD \$28 Million in Annual Savings at a Single Major Burn Center Versus Standard of Care., 2019. <https://www.biospace.com/article/releases/avita-medical-recell-system-health-economic-data-project-usd-28-million-in-annual-savings-at-a-single-major-burn-center-versus-standard-of-care/>.



13. Metzdorff MT. Evidence-based medicine: what it is, what it isn't, and are we practicing it? *J Trauma Acute Care Surg.* 2013;75(6):927-35. doi:10.1097/TA.0b013e3182932bac.
14. Djulbegovic B, Elqayam S. Many faces of rationality: Implications of the great rationality debate for clinical decision-making. *J Eval Clin Pract.* 2017;23(5):915-22. doi:10.1111/jep.12788.
15. Flores O, Stockton K, Roberts JA, Muller MJ, Paratz JD. The efficacy and safety of adrenergic blockade after burn injury: A systematic review and meta-analysis. *J Trauma Acute Care Surg.* 2016;80(1):146-55. doi:10.1097/TA.0000000000000887.
16. Avni T, Levcovich A, Ad-El DD, Leibovici L, Paul M. Prophylactic antibiotics for burns patients: systematic review and meta-analysis. *BMJ (Clinical research ed).* 2010;340:c241. doi:10.1136/bmj.c241.
17. Aziz Z, Abu SF, Chong NJ. A systematic review of silver-containing dressings and topical silver agents (used with dressings) for burn wounds. *Burns.* 2012;38(3):307-18. doi:10.1016/j.burns.2011.09.020.
18. Klein MB, Goverman J, Hayden DL, Fagan SP, McDonald-Smith GP, Alexander AK et al. Benchmarking outcomes in the critically injured burn patient. *Ann Surg.* 2014;259(5):833-41. doi:10.1097/SLA.0000000000000438.
19. Pereira C, Murphy K, Herndon D. Outcome measures in burn care. Is mortality dead? *Burns.* 2004;30(8):761-71. doi:10.1016/j.burns.2004.05.012.
20. Holavanahalli RK, Helm PA, Kowalske KJ. Long-Term Outcomes in Patients Surviving Large Burns: The Musculoskeletal System. *J Burn Care Res.* 2016;37(4):243-54. doi:10.1097/BCR.0000000000000257.
21. Blak BT, Thompson M, Dattani H, Bourke A. Generalisability of The Health Improvement Network (THIN) database: demographics, chronic disease prevalence and mortality rates. *Inform Prim Care.* 2011;19(4):251-5.
22. Curtis L, Burns A. Unit Costs of Health and Social Care 2018. University of Kent, Personal Social Services Research Unit, Canterbury. 2018. <https://kar.kent.ac.uk/70995/>. Accessed 25 July 2019.
23. Department of Health. National Schedule of NHS reference costs 2017/18. <https://improvement.nhs.uk/resources/reference-costs/>. Accessed 25 July 2019.
24. Drug Tariff. Drug Tariff. 2018. <https://www.drugtariff.co.uk>. Accessed 25 July 2019.
25. Al-Mousawi AM, Mecott-Rivera GA, Jeschke MG, Herndon DN. Burn teams and burn centers: the importance of a comprehensive team approach to burn care. *Clin Plast Surg.* 2009;36(4):547-54. doi:10.1016/j.cps.2009.05.015.

- 1  
2  
3 26. Wounds International. International Best Practice Guidelines: Effective skin and wound  
4 management of non-complex burns. 2016.  
5 [https://www.woundsinternational.com/resources/details/best-practice-guidelines-effective-](https://www.woundsinternational.com/resources/details/best-practice-guidelines-effective-skin-and-wound-management-in-non-complex-burns)  
6 [skin-and-wound-management-in-non-complex-burns](https://www.woundsinternational.com/resources/details/best-practice-guidelines-effective-skin-and-wound-management-in-non-complex-burns).  
7  
8  
9  
10 27. The Queen's Nursing Institute. General Practice Nursing in the 21st Century: A Time of  
11 Opportunity. 2016. [https://www.qni.org.uk/wp-content/uploads/2016/09/gpn\\_c21\\_report.pdf](https://www.qni.org.uk/wp-content/uploads/2016/09/gpn_c21_report.pdf).  
12  
13 28. Edwards J. Developing a burns link nurse framework for minor burn management. Wounds  
14 UK. 2013;9(3):10-3.  
15  
16 29. Benson A, Dickson WA, Boyce DE. Burns. BMJ (Clinical research ed).  
17 2006;332(7542):649-52. doi:10.1136/bmj.332.7542.649.  
18  
19 30. Stylianou N, Buchan I, Dunn KW. A review of the international Burn Injury Database  
20 (iBID) for England and Wales: descriptive analysis of burn injuries 2003-2011. BMJ Open.  
21 2015;5(2):e006184. doi:10.1136/bmjopen-2014-006184.  
22  
23 31. Edwards J. Use of Silvercel Non-Adherent on burn wounds: a case series. Wounds UK  
24 2013. 2013;9:81-4.  
25  
26 32. Edwards-Jones V, Greenwood JE. What's new in burn microbiology? Burns.  
27 2003;29(1):15-24. doi:10.1016/s0305-4179(02)00203-6.  
28  
29 33. Atiyeh BS, Ibrahim A, Hayek S, N. . Burn wound cleansing: an efficient evidence-based  
30 treatment modality or a ritualistic practice. J Wound Technol 2010;7:6-10.  
31  
32 34. Church D, Elsayed S, Reid O, Winston B, Lindsay R. Burn wound infections. Clin  
33 Microbiol Rev. 2006;19(2):403-34. doi:10.1128/CMR.19.2.403-434.2006.  
34  
35 35. Wasiak J, Cleland H, Campbell F, Spinks A. Dressings for superficial and partial thickness  
36 burns. Cochrane Database Syst Rev. 2013(3):CD002106.  
37 doi:10.1002/14651858.CD002106.pub4.  
38  
39 36. Norman G, Christie J, Liu Z, Westby MJ, Jefferies JM, Hudson T et al. Antiseptics for  
40 burns. Cochrane Database Syst Rev. 2017;7:CD011821.  
41 doi:10.1002/14651858.CD011821.pub2.  
42  
43 37. Guest JF. Costs of acute and chronic wounds incurred by an average Clinical  
44 Commissioning Group/Health Board in the UK. Presented at Wounds UK; Harrogate,  
45 UK2016.  
46  
47 38. Guest JF, Fuller GW, Vowden P. Costs and outcomes in evaluating management of  
48 unhealed surgical wounds in the community in clinical practice in the UK: a cohort study. BMJ  
49 Open. 2018;8(12):e022591. doi:10.1136/bmjopen-2018-022591.  
50  
51  
52  
53  
54  
55  
56  
57  
58  
59  
60

- 1  
2  
3 39. Guest JF, Fuller GW, Vowden P. Venous leg ulcer management in clinical practice in the  
4 UK: costs and outcomes. *Int Wound J*. 2018;15(1):29-37. doi:10.1111/iwj.12814.  
5  
6 40. Guest JF, Fuller GW, Vowden P. Diabetic foot ulcer management in clinical practice in the  
7 UK: costs and outcomes. *Int Wound J*. 2018;15(1):43-52. doi:10.1111/iwj.12816.  
8  
9 41. Guest JF, Fuller GW, Vowden P, Vowden KR. Cohort study evaluating pressure ulcer  
10 management in clinical practice in the UK following initial presentation in the community:  
11 costs and outcomes. *BMJ Open*. 2018;8(7):e021769. doi:10.1136/bmjopen-2018-021769.  
12  
13  
14  
15  
16  
17  
18  
19  
20  
21  
22  
23  
24  
25  
26  
27  
28  
29  
30  
31  
32  
33  
34  
35  
36  
37  
38  
39  
40  
41  
42  
43  
44  
45  
46  
47  
48  
49  
50  
51  
52  
53  
54  
55  
56  
57  
58  
59  
60

For peer review only

**Table 1. Patients' baseline characteristics.**

|                                                    |       |
|----------------------------------------------------|-------|
| Mean age at time of presentation (years)           | 57.8  |
| Percentage female                                  | 61%   |
| Mean systolic blood pressure (mm Hg)               | 131.4 |
| Mean diastolic blood pressure (mm Hg)              | 75.8  |
| Mean body mass index (BMI) (kg/m <sup>2</sup> )    | 30.2  |
| Percentage with BMI <20.0kg/m <sup>2</sup>         | 7%    |
| Percentage with BMI ≥30.0kg/m <sup>2</sup>         | 41%   |
| Percentage who were current smokers                | 24%   |
| Percentage who were ex-smokers                     | 22%   |
| Percentage who were non-smokers                    | 54%   |
| <b>Percentage with the following comorbidities</b> |       |
| Musculoskeletal                                    | 72%   |
| Cardiovascular                                     | 64%   |
| Endocrinological                                   | 50%   |
| Respiratory                                        | 45%   |
| Dermatological                                     | 43%   |
| Psychiatric                                        | 40%   |
| Gastroenterological                                | 37%   |
| Neurological                                       | 29%   |
| Genito-urinary                                     | 20%   |
| Renal                                              | 20%   |
| Oncological                                        | 19%   |
| Ophthalmological                                   | 16%   |
| Immunological                                      | 10%   |
| Haematological                                     | 5%    |
| <b>Percentage with the following burns</b>         |       |
| Unspecified location and thickness                 | 58.8% |
| Hand (unspecified thickness)                       | 12.9% |
| Lower limb (unspecified thickness)                 | 9.2%  |
| Upper limb (unspecified thickness)                 | 7.5%  |
| Scald of unspecified location and thickness        | 4.4%  |
| Trunk (unspecified thickness)                      | 3.4%  |
| Face, head or neck (unspecified thickness)         | 1.7%  |
| Partial thickness (unspecified location)           | 1.4%  |
| Full thickness (unspecified location)              | 0.3%  |

**Table 2: Health care resource use associated with managing burns in clinical practice.**

| <b>Resource</b>                                                    | <b>Resource use over 24 months<br/>from initial presentation</b> |                                 |
|--------------------------------------------------------------------|------------------------------------------------------------------|---------------------------------|
|                                                                    | <b>Percentage of burns</b>                                       | <b>Mean number<br/>per burn</b> |
| Practice nurse visits                                              | 98%                                                              | 54.8                            |
| GP visits                                                          | 97%                                                              | 23.5                            |
| Outpatient clinic visits                                           | 91%                                                              | 22.2                            |
| District nurse visits                                              | 18%                                                              | 1.9                             |
| Accident & emergency attendances                                   | 34%                                                              | 1.9                             |
| Hospital admissions                                                | 28%                                                              | 0.9                             |
| Surgical admissions                                                | 4%                                                               | 0.05                            |
| Dressings                                                          | 55%                                                              | 457.8                           |
| Single dressings                                                   | 14%                                                              | 128.3                           |
| Multiple dressings                                                 | 41%                                                              | 672.0                           |
| Prescriptions for analgesics and non-steroidal anti-inflammatories | 68%                                                              | 8.7                             |

**Table 3: Prescribed dressings documented in the patients' records.**

| Percentage of burns that were treated with the following dressing: |           |          |               |                  |      |              |          |               |                 |       |           |              |
|--------------------------------------------------------------------|-----------|----------|---------------|------------------|------|--------------|----------|---------------|-----------------|-------|-----------|--------------|
| Month of treatment                                                 | Absorbent | Alginate | Antimicrobial | Capillary-action | Foam | Hydrocolloid | Hydrogel | Low-adherence | Odour absorbent | Other | Permeable | Soft polymer |
| 1                                                                  | 12%       | 1%       | 6%            | 0%               | 6%   | 5%           | 1%       | 7%            | 0%              | 45%   | 9%        | 13%          |
| 2                                                                  | 3%        | 4%       | 3%            | 2%               | 4%   | 7%           | 4%       | 3%            | 2%              | 24%   | 1%        | 7%           |
| 3                                                                  | 8%        | 1%       | 3%            | 1%               | 5%   | 1%           | 5%       | 3%            | 1%              | 6%    | 2%        | 5%           |
| 4                                                                  | 5%        | 8%       | 3%            | 3%               | 3%   | 5%           | 2%       | 4%            | 2%              | 7%    | 3%        | 3%           |
| 5                                                                  | 4%        | 1%       | 4%            | 0%               | 8%   | 3%           | 4%       | 4%            | 5%              | 8%    | 1%        | 6%           |
| 6                                                                  | 5%        | 0%       | 1%            | 2%               | 3%   | 6%           | 1%       | 5%            | 0%              | 8%    | 3%        | 6%           |
| 7                                                                  | 7%        | 0%       | 1%            | 1%               | 9%   | 1%           | 3%       | 3%            | 2%              | 6%    | 3%        | 4%           |
| 8                                                                  | 4%        | 3%       | 2%            | 0%               | 2%   | 4%           | 1%       | 5%            | 1%              | 5%    | 1%        | 4%           |
| 9                                                                  | 4%        | 1%       | 5%            | 1%               | 2%   | 3%           | 4%       | 2%            | 3%              | 2%    | 3%        | 5%           |
| 10                                                                 | 6%        | 3%       | 3%            | 2%               | 3%   | 2%           | 2%       | 7%            | 0%              | 8%    | 1%        | 5%           |
| 11                                                                 | 4%        | 3%       | 5%            | 0%               | 7%   | 2%           | 2%       | 4%            | 5%              | 9%    | 4%        | 2%           |
| 12                                                                 | 5%        | 0%       | 7%            | 3%               | 3%   | 5%           | 2%       | 3%            | 1%              | 8%    | 1%        | 6%           |
| 13                                                                 | 6%        | 3%       | 3%            | 3%               | 3%   | 3%           | 3%       | 3%            | 1%              | 8%    | 3%        | 2%           |
| 14                                                                 | 9%        | 0%       | 8%            | 0%               | 3%   | 3%           | 1%       | 4%            | 1%              | 8%    | 3%        | 3%           |
| 15                                                                 | 5%        | 5%       | 1%            | 6%               | 0%   | 3%           | 1%       | 4%            | 3%              | 8%    | 3%        | 8%           |
| 16                                                                 | 5%        | 2%       | 7%            | 0%               | 3%   | 2%           | 0%       | 6%            | 1%              | 6%    | 5%        | 5%           |
| 17                                                                 | 9%        | 6%       | 3%            | 3%               | 6%   | 6%           | 0%       | 4%            | 2%              | 9%    | 9%        | 6%           |
| 18                                                                 | 7%        | 5%       | 9%            | 0%               | 8%   | 1%           | 4%       | 3%            | 4%              | 7%    | 2%        | 7%           |
| 19                                                                 | 5%        | 1%       | 7%            | 5%               | 2%   | 8%           | 0%       | 7%            | 1%              | 9%    | 2%        | 7%           |
| 20                                                                 | 8%        | 1%       | 5%            | 2%               | 7%   | 2%           | 5%       | 3%            | 3%              | 7%    | 3%        | 6%           |
| 21                                                                 | 5%        | 4%       | 5%            | 0%               | 4%   | 7%           | 0%       | 9%            | 2%              | 6%    | 1%        | 10%          |
| 22                                                                 | 8%        | 0%       | 5%            | 1%               | 1%   | 3%           | 5%       | 3%            | 8%              | 13%   | 5%        | 4%           |
| 23                                                                 | 12%       | 3%       | 7%            | 4%               | 6%   | 3%           | 3%       | 15%           | 1%              | 11%   | 4%        | 12%          |
| 24                                                                 | 6%        | 5%       | 8%            | 0%               | 10%  | 6%           | 0%       | 5%            | 3%              | 21%   | 16%       | 8%           |

**Table 4: Cost of health care resource use associated with managing burns in clinical practice at 2017/18 prices (percentage of total cost is in parenthesis).**

| Resource                                                           | Mean cost of resource use per burn over 24 months from initial presentation |               |                   |               |                   |               |
|--------------------------------------------------------------------|-----------------------------------------------------------------------------|---------------|-------------------|---------------|-------------------|---------------|
|                                                                    | All burns                                                                   |               | Healed burns      |               | Unhealed burns    |               |
| Medical admissions (no surgery)                                    | £8,879.70                                                                   | (52%)         | £6,292.18         | (52%)         | £21,347.72        | (53%)         |
| Outpatient visits                                                  | £2,601.60                                                                   | (15%)         | £1,931.91         | (16%)         | £5,897.84         | (15%)         |
| GP visits                                                          | £2,004.80                                                                   | (12%)         | £1,501.41         | (13%)         | £4,488.47         | (11%)         |
| Practice nurse visits                                              | £1,314.30                                                                   | (8%)          | £975.89           | (8%)          | £2,976.36         | (7%)          |
| Dressings                                                          | £850.00                                                                     | (5%)          | £462.60           | (4%)          | £2,573.34         | (6%)          |
| Surgical admissions                                                | £524.70                                                                     | (3%)          | £323.42           | (3%)          | £1,449.60         | (4%)          |
| Accident & emergency                                               | £318.00                                                                     | (2%)          | £228.31           | (2%)          | £752.81           | (2%)          |
| Community nurse visits                                             | £117.40                                                                     | (1%)          | £59.69            | (0%)          | £356.33           | (1%)          |
| Bandages                                                           | £120.40                                                                     | (1%)          | £76.82            | (1%)          | £322.52           | (1%)          |
| Prescriptions for analgesics and non-steroidal anti-inflammatories | £150.90                                                                     | (1%)          | £119.37           | (1%)          | £313.96           | (1%)          |
| Other wound care products                                          | £34.70                                                                      | (0%)          | £25.11            | (0%)          | £81.35            | (0%)          |
| Ambulance                                                          | £5.70                                                                       | (0%)          | £4.80             | (0%)          | £10.75            | (0%)          |
| Laboratory tests                                                   | £1.70                                                                       | (0%)          | £0.82             | (0%)          | £5.61             | (0%)          |
| <b>TOTAL</b>                                                       | <b>£16,923.90</b>                                                           | <b>(100%)</b> | <b>£12,002.33</b> | <b>(100%)</b> | <b>£40,576.66</b> | <b>(100%)</b> |

**Table 5: Cost of Wound Care Stratified by Infection Management.**

|                                                                    | <b>Percentage<br/>of cohort</b> | <b>Percentage<br/>healed</b> | <b>Time to healing<br/>(months)</b> | <b>Mean cost<br/>of care</b> |
|--------------------------------------------------------------------|---------------------------------|------------------------------|-------------------------------------|------------------------------|
| No evidence of infection                                           | 40%                             | 69%                          | 3.4                                 | £4,379                       |
| Suspect infection                                                  | 60%                             | 66%                          | 11.2                                | £26,671                      |
| Suspect infection and only<br>received antibiotics                 | 43%                             | 71%                          | 10.7                                | £24,396                      |
| Suspect infection and only<br>received antimicrobials              | 4%                              | 50%                          | 5.1                                 | £12,606                      |
| Suspect infection and received<br>anti-infectives & antimicrobials | 13%                             | 48%                          | 12.9                                | £38,406                      |



**Table 6: Cost of Wound Care Stratified by Body Mass Index.**

|           | <b>% of patients</b> | <b>% healed</b> | <b>NHS cost per patient</b> |
|-----------|----------------------|-----------------|-----------------------------|
| BMI <20   | 7%                   | 55%             | £9,411                      |
| BMI 20-29 | 41%                  | 66%             | £11,485                     |
| BMI 30-35 | 27%                  | 74%             | £15,143                     |
| BMI >35   | 20%                  | 83%             | £20,049                     |

1  
2  
3 **Figure 1: Wound Healing**  
4

5 **Figure 2: Patients who Received Multiple Dressings.**  
6

7  
8 **Figure 3: Monthly NHS Cost of Wound Care at 2017/18 Prices.**  
9

10 **Figure 4: Kaplan Meier Analysis of Infection.**  
11

12 **Figure 5. Kaplan Meier Analysis of Body Mass Index.**  
13  
14  
15  
16  
17  
18  
19  
20  
21  
22  
23  
24  
25  
26  
27  
28  
29  
30  
31  
32  
33  
34  
35  
36  
37  
38  
39  
40  
41  
42  
43  
44  
45  
46  
47  
48  
49  
50  
51  
52  
53  
54  
55  
56  
57  
58  
59  
60

For peer review only

1  
2  
3  
4  
5  
6  
7  
8  
9  
10  
11  
12  
13  
14  
15  
16  
17  
18  
19  
20  
21  
22  
23  
24  
25  
26  
27  
28  
29  
30  
31  
32  
33  
34  
35  
36  
37  
38  
39  
40  
41  
42  
43  
44  
45  
46  
47  
48  
49  
50  
51  
52  
53  
54  
55  
56  
57  
58  
59  
60

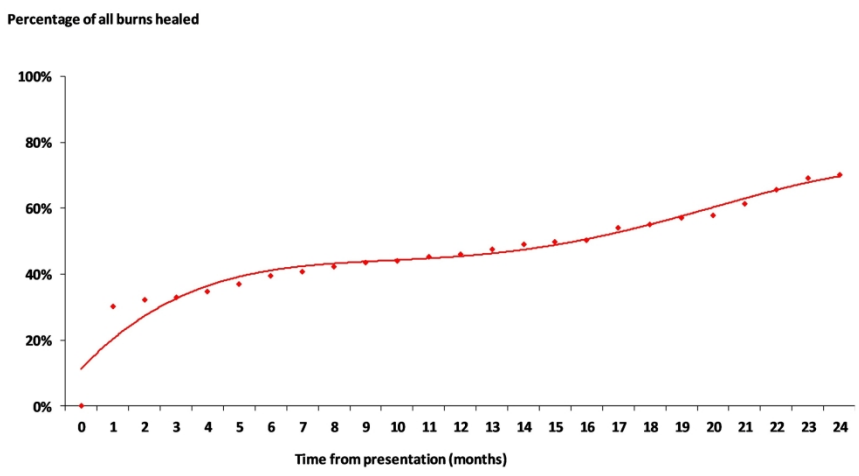

Figure 1

275x190mm (300 x 300 DPI)

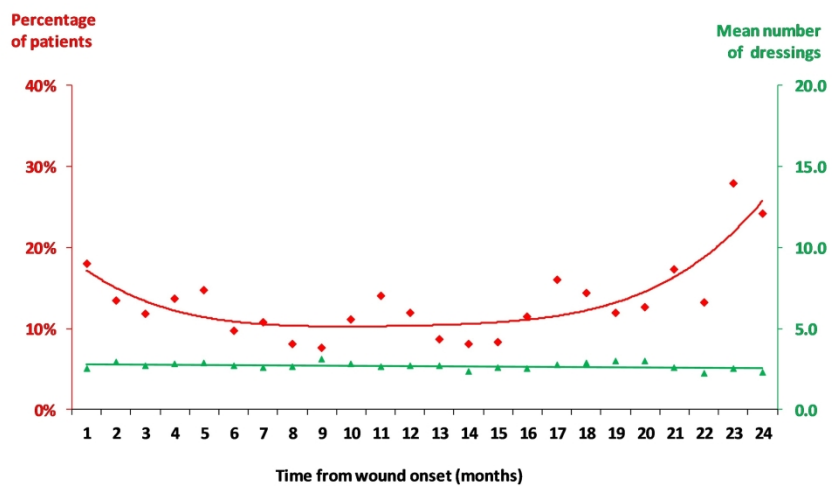

Figure 2

275x190mm (300 x 300 DPI)

1  
2  
3  
4  
5  
6  
7  
8  
9  
10  
11  
12  
13  
14  
15  
16  
17  
18  
19  
20  
21  
22  
23  
24  
25  
26  
27  
28  
29  
30  
31  
32  
33  
34  
35  
36  
37  
38  
39  
40  
41  
42  
43  
44  
45  
46  
47  
48  
49  
50  
51  
52  
53  
54  
55  
56  
57  
58  
59  
60

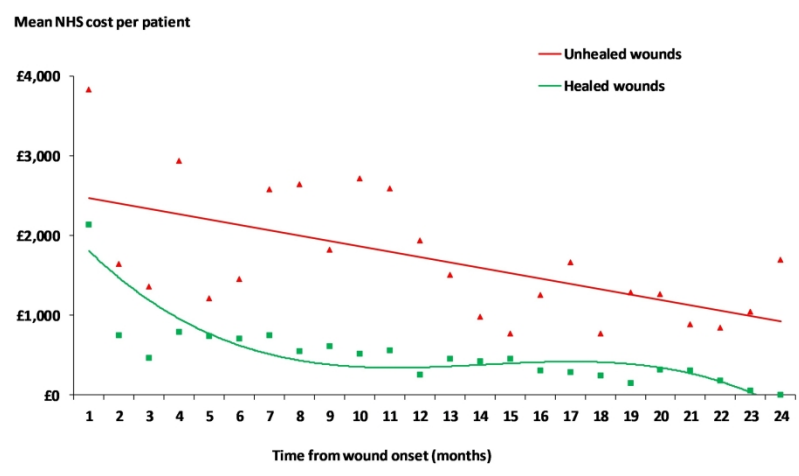

Figure 3

275x190mm (300 x 300 DPI)

1  
2  
3  
4  
5  
6  
7  
8  
9  
10  
11  
12  
13  
14  
15  
16  
17  
18  
19  
20  
21  
22  
23  
24  
25  
26  
27  
28  
29  
30  
31  
32  
33  
34  
35  
36  
37  
38  
39  
40  
41  
42  
43  
44  
45  
46  
47  
48  
49  
50  
51  
52  
53  
54  
55  
56  
57  
58  
59  
60

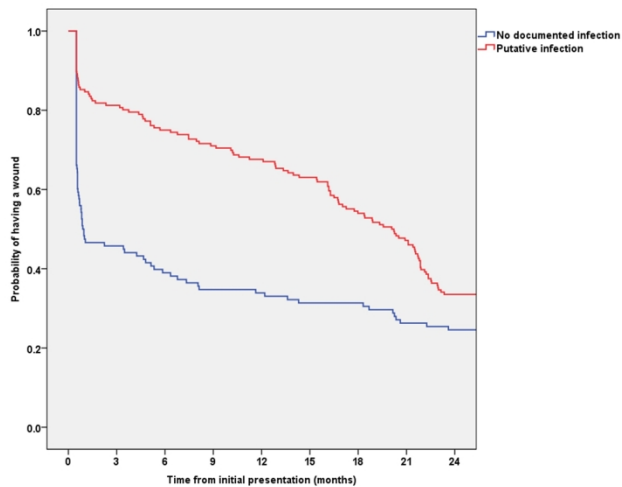

Figure 4

275x190mm (300 x 300 DPI)

1  
2  
3  
4  
5  
6  
7  
8  
9  
10  
11  
12  
13  
14  
15  
16  
17  
18  
19  
20  
21  
22  
23  
24  
25  
26  
27  
28  
29  
30  
31  
32  
33  
34  
35  
36  
37  
38  
39  
40  
41  
42  
43  
44  
45  
46  
47  
48  
49  
50  
51  
52  
53  
54  
55  
56  
57  
58  
59  
60

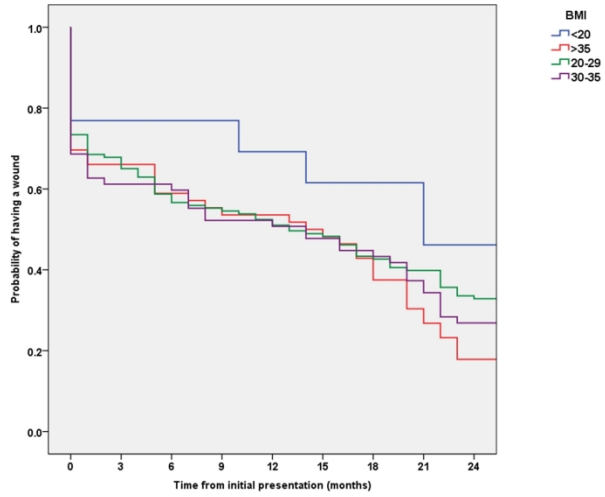

Figure 5

275x190mm (300 x 300 DPI)

# BMJ Open

## A COHORT STUDY EVALUATING MANAGEMENT OF BURNS IN THE COMMUNITY IN CLINICAL PRACTICE IN THE UK: COSTS AND OUTCOMES

|                                 |                                                                                                                                                                |
|---------------------------------|----------------------------------------------------------------------------------------------------------------------------------------------------------------|
| Journal:                        | <i>BMJ Open</i>                                                                                                                                                |
| Manuscript ID                   | bmjopen-2019-035345.R1                                                                                                                                         |
| Article Type:                   | Original research                                                                                                                                              |
| Date Submitted by the Author:   | 03-Jan-2020                                                                                                                                                    |
| Complete List of Authors:       | Guest, Julian F.; Catalyst Consultants; King's College London, Fuller, Graham; Catalyst Consultants Edwards, Jacky; Manchester University NHS Foundation Trust |
| <b>Primary Subject Heading</b>: | Health economics                                                                                                                                               |
| Secondary Subject Heading:      | Health services research                                                                                                                                       |
| Keywords:                       | HEALTH ECONOMICS, TRAUMA MANAGEMENT, WOUND MANAGEMENT                                                                                                          |
|                                 |                                                                                                                                                                |

SCHOLARONE™  
Manuscripts





I, the Submitting Author has the right to grant and does grant on behalf of all authors of the Work (as defined in the below author licence), an exclusive licence and/or a non-exclusive licence for contributions from authors who are: i) UK Crown employees; ii) where BMJ has agreed a CC-BY licence shall apply, and/or iii) in accordance with the terms applicable for US Federal Government officers or employees acting as part of their official duties; on a worldwide, perpetual, irrevocable, royalty-free basis to BMJ Publishing Group Ltd ("BMJ") its licensees and where the relevant Journal is co-owned by BMJ to the co-owners of the Journal, to publish the Work in this journal and any other BMJ products and to exploit all rights, as set out in our [licence](#).

The Submitting Author accepts and understands that any supply made under these terms is made by BMJ to the Submitting Author unless you are acting as an employee on behalf of your employer or a postgraduate student of an affiliated institution which is paying any applicable article publishing charge ("APC") for Open Access articles. Where the Submitting Author wishes to make the Work available on an Open Access basis (and intends to pay the relevant APC), the terms of reuse of such Open Access shall be governed by a Creative Commons licence – details of these licences and which [Creative Commons](#) licence will apply to this Work are set out in our licence referred to above.

Other than as permitted in any relevant BMJ Author's Self Archiving Policies, I confirm this Work has not been accepted for publication elsewhere, is not being considered for publication elsewhere and does not duplicate material already published. I confirm all authors consent to publication of this Work and authorise the granting of this licence.

**ORIGINAL ARTICLE****A COHORT STUDY EVALUATING MANAGEMENT OF BURNS IN THE  
COMMUNITY IN CLINICAL PRACTICE IN THE UK:  
COSTS AND OUTCOMES****Julian F Guest<sup>1,2</sup>, Graham W Fuller<sup>1</sup>, Jacky Edwards<sup>3</sup>****<sup>1</sup> Catalyst Health Economics Consultants, Rickmansworth, UK****<sup>2</sup> Faculty of Life Sciences and Medicine, King's College, London, UK****<sup>3</sup> Manchester Foundation Trust, Manchester, UK****Correspondence to:**

Professor Julian F Guest

CATALYST Health Economics Consultants

7 Gilham Court

Ebury Road

Rickmansworth

Hertfordshire WD3 1FZ

UK

Tel: +44 (0) 1923 450045

E-mail: julian.guest@catalyst-health.com

**Running title:** Health economic impact of burns in the UK**Keywords:** Burden; burns; cost; wounds; UK.

## ABSTRACT

**Objective:** To evaluate health outcomes, resource use and corresponding costs attributable to managing burns in clinical practice, from initial presentation, among a cohort of adults in the UK.

**Design:** Retrospective cohort analysis of the records of a randomly selected cohort of 260 patients from the THIN database who had 294 evaluable burns

**Setting:** Primary and secondary care sectors in the UK.

**Primary and Secondary Outcome Measures:** Patients' characteristics, wound-related health outcomes, health care resource use, and total National Health Service (NHS) cost of patient management.

**Results:** Diagnosis was incomplete in 63% of patients' records since the location, depth and size of the burns was missing. Overall, 70% of all the burns healed within 24 months and the time to healing was a mean of 7.8 months per burn. Sixty-six per cent of burns were initially managed in the community and the other 34% were managed at Accident and Emergency departments. Patients' wounds were subsequently managed predominantly by practice nurses and hospital outpatient clinics. Forty-five percent of burns had no documented dressings in the patients' records. The mean NHS cost of wound care in clinical practice over 24 months from initial presentation was an estimated £16,924 per burn, ranging from £12,002 and £40,577 for a healed and unhealed wound, respectively.

**Conclusion:** Due to incomplete documentation in the patients' records, it is difficult to say whether the time to healing was excessive or what other confounding factors may have contributed to the delayed healing. This study indicates the need for education of general practice clinicians on the management and care of burn wounds. Furthermore, it is beholden on the burns community to determine how the poor healing rates can be improved. Strategies are required to improve documentation in patients' records, integration of care between different providers, wound healing rates and reducing infection.

## STRENGTHS AND LIMITATIONS OF THIS STUDY

- This is the first study to evaluate patient pathways and associated health outcomes, resource use and corresponding costs attributable to managing burns across both primary and secondary care over 24 months from initial presentation.
- This study undertaken using real world evidence derived from the anonymised records of a sample of patients in The Health Improvement Network (THIN) database (a nationally representative database of clinical practice among >11 million patients registered with general practitioners in the UK).
- The estimates were derived following a systematic analysis of patients' characteristics, wound-related health outcomes and all primary and secondary care resource use contained in the patients' electronic records.
- Computerised information in the THIN database is collected by general practitioners for clinical care purposes and not for research, consequently the accuracy of wound descriptors and other terminology have not been validated, but does reflect real world documentation in clinical practice.
- The analysis does not consider the potential impact of those wounds that remained unhealed beyond the study period.

1  
2  
3 **FUNDING**  
4

5  
6 This study was funded by J.F.G., the lead author, without any external support.  
7  
8  
9

10  
11 **COMPETING INTERESTS**  
12

13  
14  
15 None declared.  
16  
17  
18  
19  
20  
21  
22  
23  
24  
25  
26  
27  
28  
29  
30  
31  
32  
33  
34  
35  
36  
37  
38  
39  
40  
41  
42  
43  
44  
45  
46  
47  
48  
49  
50  
51  
52  
53  
54  
55  
56  
57  
58  
59  
60

For peer review only

## CONTRIBUTORS

J.F.G. designed the study, managed the analyses, performed some analyses, checked all the other analyses, and wrote the manuscript.

G.W.F. conducted much of the analyses.

J.E. scrutinised the analyses, suggested further analyses and helped interpret some of the findings.

All the authors were involved in revising the manuscript and gave final approval. J.F.G. is the guarantor of this work and, as such, had full access to all the data in the study and takes responsibility for the integrity of the data and the accuracy of the data analysis.

## **ETHICS APPROVAL**

Ethics approval to use anonymised patients' records from the THIN database for this study was obtained from the Research Ethics Committee that appraises studies using the THIN database (reference number 13-061).

## **DATA SHARING STATEMENT**

The THIN data set cannot be shared as this restriction was a condition of the ethics approval obtained from the Research Ethics Committee (reference number 13-061). Questions concerning the data underlying the results can be sent to the Corresponding Author.

## INTRODUCTION

Burns are a serious pathology, potentially leading to severe morbidity and significant mortality. [1]. They can also be among the most expensive traumatic injuries to manage, generating a substantial health-economic impact [1, 2]. In 2012/13 the UK's National Health Service managed an estimated 87,000 burns (excluding chemical and electrical burns) among adults at a cost of £90 million [3, 4]. In that year, there were approximately 20,000 adult burns-related admissions into hospitals in England, of which 20% of descriptions lacked specificity [5]. In 2017/18, this increased to 23,500 adult burns-related admissions into hospitals in England, of which 30% of descriptions lacked specificity [5]. Globally, millions of individuals suffer from burn-related injuries each year [6], and up to 200,000 people die from these injuries, the majority of which occur in low- and middle-income countries [7, 8].

In addition to the economic impact, burns-related injuries can result in functional, psychological and social effects on both survivors and their families. Moreover, non-fatal burns are a leading cause of morbidity, disfigurement and disability, often leading to social stigma and rejection [8]. There are multiple strategies for managing burns and the associated impact on patient physiology, with new care pathways and technology being introduced on a regular basis [9-12].

A clinician's treatment of choice should be tailored to each patient using updated high quality scientific evidence [13, 14]. Nevertheless, despite the increasing numbers of published randomised controlled trials in burn care, systematic reviews have not provided sufficient evidence to support many commonly used interventions or management strategies [15-17]. Patients who experience a burn represent a heterogeneous population, with variations in age, mechanism of injury, depth, site and size of burn. Hence, selecting the most important outcomes to measure in burn care is challenging [18, 19]. Moreover, the follow-up period at which outcomes are measured may also determine the metrics to be assessed, which can include healing time, skin-graft loss, infection rates as well as functional, cosmetic and psychological issues [20].

Despite this, the Authors were unable to find any published evidence on the management of burns and time to healing in clinical practice across the primary and secondary care sectors in the UK. Accordingly, the objective of the present analysis was to follow a cohort of adult



1  
2  
3 patients in clinical practice from initial presentation of their burn to evaluate in greater depth  
4 how patients are managed and its impact on healing and NHS costs  
5  
6  
7  
8  
9  
10  
11  
12  
13  
14  
15  
16  
17  
18  
19  
20  
21  
22  
23  
24  
25  
26  
27  
28  
29  
30  
31  
32  
33  
34  
35  
36  
37  
38  
39  
40  
41  
42  
43  
44  
45  
46  
47  
48  
49  
50  
51  
52  
53  
54  
55  
56  
57  
58  
59  
60

For peer review only

## METHODS

### Study Design

This was a retrospective cohort analysis of the case records of adult patients with a burn randomly extracted from The Health Improvement Network (THIN) database. The perspective of the analysis was the NHS' primary and secondary care sectors in the UK and the time horizon was 24 months from initial presentation in the community.

### THIN Database

The THIN database contains longitudinal electronic records on >11 million anonymised patients entered by general practitioners (GPs) from >560 practices across the UK. The patient composition within the THIN database has been shown to be representative of the UK population in terms of demographics and disease distribution [21] and the database theoretically contains patients' entire medical history. In particular, the database collects data on the dates that patients registered or left their practice as well as demographic data such as date of birth and gender. Patients who reside at the same address or are members of the same family can be linked using a household identifier, provided they are registered with the same GP practice.

All medical conditions and symptoms recorded electronically during a patient's consultation in the general practice are recorded in the THIN database, thereby building up long computerised medical histories using Read codes. GP prescribing is computerised and entered directly into the database. Prescriptions not issued electronically (e.g. during home visits) are also entered, however there is a possibility of under-recording of such items. Information is also recorded on referrals to secondary care, including the specialty. Secondary care information and other medically-related information received by the practice is entered into the database. This includes details on hospital admissions, discharge medication, diagnosis, outpatient consultations, investigations and treatment outcomes. Details from other health care interventions, such as information on lifestyle and preventative healthcare, as well as a range of variables such as height, weight, body mass index, blood pressure, smoking and alcohol status, immunisation and laboratory test results are also recorded. Hence, the information contained in the THIN database reflects actual clinical practice.

(THIN is a registered trademark of Cegedim SA in the United Kingdom and other countries. Reference made to the THIN database is intended to be descriptive of the data asset licensed by IQVIA).

## Study Population

The authors had previously obtained a random sample of records of 6,000 adult patients with a documented history of a wound for whatever reason from the THIN database, for previous wound studies [3, 4, 22-30]. The study population of 260 patients was identified within this cohort of 6,000 patients according to the following criteria:

- Were 18 years of age or over.
- Had a Read code for a burn including a scald either during or after 2012.
- Had continuous medical history in their case record from the first mention of their wound unless it healed.
- Patients with a Read code for a chemical or electric burn were excluded from the data set, and so too were those with a Read code for sunburn.
- Patients with a Read code for a dermatological tumour were also excluded from the data set.
- Any patients with a Read code for a burn who died within two years of initial presentation were also excluded, since the study design was to examine the trajectory of these wounds over a full 24 months from initial presentation unless it healed.

## Patient and Public Involvement

Patients and members of the public were not directly involved in this study. The study population was limited to the anonymised records of patients in the THIN database.

## Study Variables and Statistical Analyses

Information was systematically extracted from the patients' electronic records over a period of 24 months from initial presentation. This included patients' characteristics, comorbidities (defined as a non-acute condition that patients were suffering from in the year before their burn), wound-related healthcare resource use (i.e. dressings, bandages, topical treatments, district nurse visits (who provide care within a patient's home), practice nurse visits (who

1  
2  
3 provide care within a GP's surgery), GP visits, hospital outpatient visits, hospital admissions,  
4 laboratory tests, GP prescribed medication (i.e. analgesics, non-steroidal anti-inflammatory  
5 drugs (NSAIDs) and systemic anti-infectives (principally antibiotics)) and clinical outcomes  
6 (i.e. healing and putative infection). No assumptions were made regarding missing data and  
7 there were no interpolations.  
8  
9  
10

11  
12  
13 Differences between two subgroups were tested for statistical significance using a Mann-  
14 Whitney U test or  $\chi^2$  test. Differences between three subgroups were tested for statistical  
15 significance using a Kruskal-Wallis test or  $\chi^2$  test. Binary logistic regression investigated  
16 relationships between baseline variables and clinical outcomes. Kaplan-Meier analyses were  
17 undertaken to compare the healing distribution of different subgroups. The p values <0.05 were  
18 considered statistically significant and have been reported. All p values  $\geq 0.05$  were not  
19 considered to be statistically significant and these numerical values have not been reported. All  
20 statistical analyses were performed using IBM SPSS Statistics (IBM UK).  
21  
22  
23  
24  
25  
26  
27  
28

### 29 **Cost of Patient Management**

30  
31  
32 The NHS cost of wound care for each burn was estimated by assigning unit costs at 2017/2018  
33 prices [31-33] to the quantity of healthcare resource used to manage individual burns. The  
34 mean cost of utilisation of each healthcare resource was then combined in order to estimate the  
35 mean NHS cost of managing a burn over 24 months from initial presentation. Accordingly, the  
36 study only considers the cost of wound management and does not estimate patients' overall  
37 healthcare costs.  
38  
39  
40  
41  
42  
43

### 44 **Sensitivity Analyses**

45  
46  
47 Deterministic sensitivity analyses were undertaken to assess how the cost of managing a burn  
48 changes by varying the values of clinical outcomes and resource use.  
49  
50  
51  
52  
53  
54  
55  
56  
57  
58  
59  
60

## RESULTS

### Patients' Characteristics

The study population comprised the anonymised case records of a randomly selected cohort of 260 adult patients from the THIN database who had a burn. According to the records, 26 of these patients had 2 or more burns, resulting in 294 evaluable burns.

The patients' age in the data set was a mean of  $57.8 \pm 18.4$  years per patient, and 61% were female. Patients had a mean of 4.7 comorbidities and 30% of patients had diabetes. Characterisation of the burns in the patients' records was poor since 63% of them lacked documentary evidence of location, depth and size. Patients' baseline characteristics are summarised in Table 1.

Seventeen percent of the wounds were documented as being either scalds or hand burns. An estimated 30% of these burns occurred in the spring and <20% occurred in the summer months. The other wounds occurred with a greater frequency in the winter and spring months.

### Clinical outcomes

In accordance with the study's inclusion criteria, all the patients in our data set survived the period of 24 months following initial presentation. The THIN database does not define what a wound is, nor does it define wound healing. Wound healing was a clinical observation not necessarily confirmed by a specialist and it is unknown if the clinicians who managed these patients used any consistent definition. On that basis, 30% of all the burns healed within 1 month, 39% within 6 months, 46% within 12 months and a further 24% by 24 months (a total of 70% healed within 24 months; Figure 1), and the time to healing among the healed wounds was a mean of 7.8 months per burn. More specifically, 9% of all the burns were managed exclusively in primary care and they all healed within 2 months. A total of 77% of all the burns managed by the burns services healed and their time to healing was a mean of 8.8 months per burn, whereas 50% of the burns managed by plastics services healed and their time to healing was a mean of 15 months per burn. Of the wounds managed by a non-specified service 66% healed and their mean time to healing was 8.6 months. There were minimal differences in the comorbidity profile between patients whose wound healed and those that remained unhealed.

1  
2  
3 However, >25% of patients with a documented scald or hand burn had an ophthalmological  
4 comorbidity compared with 16% of patients with other wounds ( $p < 0.03$ ).  
5  
6  
7

### 8 **Patient Management**

9

10  
11 According to the records, 66% of burns were initially managed in the community at a patient's  
12 general practice before being referred to a hospital outpatient clinic. The other 34% were  
13 managed at Accident and Emergency departments. Of the patients who were managed at  
14 Accident and Emergency departments 15% were subsequently admitted into hospital (of which  
15 1% underwent surgery) and 19% were managed as outpatients. Over the 24 months from the  
16 burn injury, patients were predominantly managed by practice nurses and seen in a hospital  
17 outpatient clinic between 1 and 4 times a month until the wound healed. Ongoing resource use  
18 after initial presentation is summarised in Table 2.  
19  
20  
21  
22  
23  
24  
25

26  
27 Fifty-five percent of the burns were treated with dressings and the other 45% had no  
28 documented evidence in the patients' records of dressings having been used. Table 3  
29 summarises the dressings that were prescribed. Up to 41% of burns were treated with multiple  
30 dressings (mean of 2.7 dressings per burn). Documentation in the patients' records suggests  
31 that patients would receive a dressing in a hospital outpatient clinic, but after subsequent  
32 attendance at their general practice they would either receive a combination of dressings or no  
33 dressings at all. Furthermore, the percentage of patients who received multiple dressings  
34 increased the longer the patient had their wound (Figure 2).  
35  
36  
37  
38  
39  
40  
41

### 42 **Cost of Patient Management**

43

44  
45 The mean NHS cost of wound care in clinical practice over 24 months was an estimated  
46 £16,924 per burn. However, the cost of managing an unhealed burn was significantly more  
47 than that of managing a healed burn (£12,002 versus £40,577;  $p < 0.001$ ) (Table 4). Hospital  
48 admissions were the primary cost driver and accounted for 52% of the cost of wound  
49 management. Hospital outpatient visits and general practice visits were the secondary cost  
50 drivers accounting for 15% and 12% respectively. Dressings and bandages accounted for up to  
51 6% of the cost of wound management. Of the total NHS cost of managing a burn, 27% was  
52 incurred in the community and the remainder in secondary care. Furthermore, the distribution  
53  
54  
55  
56  
57  
58  
59  
60

1  
2  
3 of costs was unaffected by whether the wound healed. Figure 3 illustrates how the monthly  
4 cost of wound management decreased for both healed and unhealed burns.  
5  
6  
7

### 8 **Antimicrobial Dressings and Antibiotics**

9

10  
11 Sixty percent of the burns were recorded as being treated with either an antimicrobial dressing  
12 or systemic antibiotic or a combination of both. The other 40% of burns had no documented  
13 evidence of having received either in the patients' records. (Table 5). The healing rate was  
14 similar among both groups. However, the time to healing was substantially longer among those  
15 burns that were recorded as having been treated with an antimicrobial dressing and/or an  
16 antibiotic and the cost of wound management increased accordingly (Table 5).  
17  
18  
19  
20  
21  
22  
23

24 Kaplan-Meier analyses demonstrated that the time to healing distribution was significantly  
25 different between wounds in the two groups ( $p < 0.001$ ) even though there was no significant  
26 difference in the overall probability of being healed by 24 months (Figure 4).  
27  
28  
29

### 30 **Body Mass Index (BMI)**

31

32  
33 The healing rate increased in parallel with increasing BMI, and so too did the cost of wound  
34 management (Table 6). Kaplan-Meier analyses (Figure 5) demonstrated that the time to healing  
35 distribution was not significantly different between patients with a different BMI ( $p = 0.191$ ),  
36 and even though the probability of healing among those with a BMI  $\geq 20\text{kg/m}^2$  was  
37 approximately a third more than those with a BMI  $< 20\text{kg/m}^2$ , the Odds ratio did not reach  
38 statistical significance. The lack of statistical significance between those with a BMI  $\geq 20\text{kg/m}^2$   
39 and those with a BMI  $< 20\text{kg/m}^2$  may be due to the small sample size. A retrospective power  
40 calculation estimated that 125 patients in each group would be required to demonstrate this  
41 observation with 80% power and a Type 1 error of 0.05.  
42  
43  
44  
45  
46  
47  
48  
49  
50  
51  
52  
53  
54  
55  
56  
57  
58  
59  
60

## Sensitivity Analyses

Sensitivity analysis showed that if the probability of healing was reduced by 25%, from 70% to 53%, the mean NHS cost of wound care over 24 months would increase by 24% to an estimated £20,920 per wound. Conversely, if the probability of healing was increased by 25%, from 70% to 88%, the mean NHS cost of wound care over 24 months would decrease by 19% to an estimated £12,693 per wound.

If the number of hospital admissions changed by 25% below or above the base case value, the mean NHS cost of wound care over 24 months would vary by 14% from the mean value (range £14,591–19,257 per burn). However, if the number of hospital outpatient visits changed by 25% below or above the base case value, the mean NHS cost of wound care over 24 months would vary by 4% from the mean value (range £16,266–17,582 per burn) and if the number of general practice visits changed by 25% below or above the base case value, the mean NHS cost of wound care would vary by 3% from the mean value (range £16,412–17,436 per burn). If the unit cost of wound care products was decreased or increased by 25%, the mean NHS cost of wound care over 24 months would only vary by 1% from the mean value (range £16,684–17,164 per burn). Changes to other model inputs had a minimal impact on the mean NHS cost of wound care in clinical practice.



## DISCUSSION

This study aimed to investigate fire-related burns and scalds, hence those with a chemical or electric burn were excluded from the analysis. The study population of 260 adult patients with 294 evaluable burns may not necessarily be representative of the total adult population with a burn in the UK, given their significant number of co-morbidities. Nevertheless, this study provides a snapshot of how patients are managed across different services that has been difficult to ascertain from other published studies. Furthermore, the study raises questions about 'burn wound chronicity'. There is a paucity of evidence on burn wound chronicity and it is not well recognised in the literature; in fact a Medline/Cinahl search for chronic burns wounds between 1980 and 2019 identified only 8 articles. All were written by surgeons, taking a surgical perspective to wound management or Marjolin's ulcers of  $\geq 10$  years duration. The majority of the articles were from developing countries where delays in presentation and healing are common. Only one study assessed a chronic burn wound and the effect that biofilm may have on wound healing, but this was a single case study [34]. Even within these articles, the suggested treatments for chronic burn wounds were predominantly debridement, infection control, and promotion of granulation tissue [35]. This lack of identification of chronicity means that modern treatments, such as biofilm-based wound care, protease modulators, electrostimulation etc are not used routinely on non-healing burn wounds [36]. In the absence of published time to healing estimates for burn wounds in the UK, it is not possible to compare the healing outcomes in this retrospective study and to elucidate whether the estimated time to healing is extreme.

Notwithstanding this, the delayed time to healing could be due to either inadequate assessment and referral to specialist services, or lack of education around burn wound management and/or recognition and appropriate treatment of a chronic burn wound. Alternatively, it may be due to nurses continuing to treat the burn scar as a wound, which is something frequently seen in clinical practice, or the wounds could have become chronic in nature, but were continued to be treated as a burn wound. Moreover, wounds of  $>12$  months in duration are frequently referred to burn services despite the wound now being chronic. Since the depth was rarely documented in the records of this study's patients, it is difficult to ascertain whether these burn wounds should all have healed by 3 weeks or should have had some surgical intervention within the first 3 weeks. Nevertheless, there is definitely a need for burns specialists to understand the

1  
2  
3 pathophysiology of chronic wounds and apply the current up-to-date wound treatments to the  
4 chronic burn wound.  
5  
6  
7

8 Burn injury can be one of the most severe forms of trauma and to achieve the best possible  
9 clinical outcome, burn care must be delivered by expert multi-disciplinary teams in specialised  
10 burns services [37]. In the UK there is significant variation in the way burns are managed and  
11 followed-up by burns services. Some services will regularly review the patient in their own  
12 clinics until the wound is healed, whereas other services will either teach patients to undertake  
13 self-care or utilise a shared-care model with either the community nursing team or practice  
14 nurses. Hence, very few patients with a burn wound are managed exclusively by practice  
15 nurses. The Authors were unable to verify from documentation in the patients' records which  
16 model of care was used for each patient and whether they were followed up by specialist  
17 services to full healing. Nevertheless, nearly all the patients in this study's cohort were jointly  
18 managed in both hospital outpatient clinics and by their general practice. It was interesting to  
19 note that wounds referred to specialist services seemed to take longer to heal, possibly due to  
20 them being deeper and larger injuries which were appropriately referred to specialist services.  
21 However, the burns managed by plastic surgery services took almost twice as long to heal and  
22 this could be due to the 'hub and spoke' arrangements in some parts of the UK (i.e. plastic  
23 surgeons who do not usually manage burns were seeing these wounds in satellite clinics with  
24 no support from burns or plastic surgery trained nurses or in services that predominantly only  
25 treat plastic surgery patients rather than burns). Of concern, in particular, is the time to healing  
26 of the wounds that were seen in burns clinics; whilst they managed to heal more patients (77%),  
27 the mean time to healing of 8.8 months probably relates back to the issues of not acknowledging  
28 burn wound chronicity and therefore amending treatments appropriately. Additionally, over  
29 the study's follow-up period of 24 months, 32% of all the burns resulted in a hospital admission.  
30  
31  
32  
33  
34  
35  
36  
37  
38  
39  
40  
41  
42  
43  
44  
45  
46  
47

48 Nonetheless, there was minimal evidence of a coordinated shared treatment plan between  
49 primary and secondary care. Documentation in the patients' records suggests that in the  
50 majority of instances, the dressings patients received in a hospital outpatient clinic were  
51 changed by clinicians in general practice and they would often be switched from a single to  
52 multiple dressings on no dressings at all. The goals of local burns wound management are the  
53 prevention of desiccation of viable tissue and control of bacteria through moist wound healing  
54 [38]. Hence, dressings removed by practice nurses are often reinstated in specialist clinics. One  
55 of the challenges to improving burns care in the community is the variable extent to which  
56  
57  
58  
59  
60

1  
2  
3 employers release and fund training and development of practice nurses [39]. Consequently,  
4 this study's wounds may have taken longer to heal if wound care was not the primary area of  
5 expertise of the nurses caring for these patients in the community. A series of Link Nurse  
6 Frameworks for burns has been developed across the Burn Operational Delivery Networks.  
7 However, despite their in-reach into both emergency departments and community nurses, very  
8 little impact has been made on practice nurses as access to these healthcare professionals has  
9 proved difficult [40]. Clearly, improving integration in management practices between  
10 secondary and primary care should lead to a better outcome for patients and would be cost-  
11 effective for the NHS.  
12  
13  
14  
15  
16  
17  
18  
19

20 The severity of a burn relates to both the depth of skin involvement and the percentage of the  
21 total body surface area (TBSA) involved [41]. Hence, the lack of documentation pertaining to  
22 diagnosis was particularly worrying. An estimated 63.2% of the records lacked a specific burn  
23 or scald location, depth and size, 34.7% only specified location but not depth and size and  
24 another 1.7% specified depth but not location and size. Consequently, any reporting system  
25 based on patients' records in primary care or the community would lead to an under-reporting  
26 and be inaccurate.  
27  
28  
29  
30  
31  
32  
33

34 The patients in this study seemed to have had significantly more comorbidities than the burn  
35 patients in the International Burn Injury Database [42], and that may have contributed to the  
36 length of time taken for their wounds to have healed. It is unusual for GPs to become involved  
37 with the management of a burn wound, and this may be due to this cohort being more at risk  
38 due to their comorbidities. Nevertheless, there is still an issue surrounding lack of burn care  
39 education among primary care clinicians. Moreover, 60% of all the burns in this cohort were  
40 considered to be infected or at risk of infection, based on documentation in the patients'  
41 records. Wound infections are one of the most serious problems that occur in the acute phase  
42 after a burn injury [43]. Several factors contribute to infection in burn wounds, notably the  
43 destruction of the skin barrier, the presence of necrosis and serosanguinous exudate, and  
44 impaired immune function [44]. Only superficial burn wounds will heal with minimal risk of  
45 infection; all other depths have the potential for colonisation and, thus, infection [43]. The risks  
46 are commensurate with the depth and extent of the burn, the health and age of the patient and  
47 local perfusion of the tissues. Local burn wound management is one of the most important  
48 aspects of burn therapy after the emergency treatment phase and can have considerable  
49 influence on time to healing [45]. For this reason, deeper wounds should always be managed  
50  
51  
52  
53  
54  
55  
56  
57  
58  
59  
60

1  
2  
3 with antimicrobials to prevent infection. Church *et al* 2006 argue that widespread application  
4 of an effective topical antimicrobial agent substantially reduces the microbial load on the open  
5 burn wound surface and reduces the risk of infection [46]. In the majority of burn units in the  
6 UK, antibiotics are not routinely prophylactically administered to burn patients because of  
7 concerns regarding antibiotic resistance, high cost, and the risk of adverse drug effects [44].  
8 However, they are routinely given to patients with burn injuries by either emergency  
9 departments or GPs as there is a lack of understanding of the normal inflammatory process of  
10 a burn. In this cohort, only 21% of all the burns were treated with an antimicrobial dressing at  
11 some point during the study's follow-up period. Consequently, the antimicrobial use may have  
12 been appropriate, but without adequate assessment of depth, a judgement cannot be made.  
13 Furthermore, there was no documentary evidence of 45% of patients ever having received a  
14 dressing for their wound, although there is no consensus on which agent or dressing is optimal  
15 for burn wound coverage to prevent or control infection or to enhance wound healing [47, 48].  
16  
17  
18  
19  
20  
21  
22  
23  
24  
25  
26

27 Resource use associated with managing a wound treated with antibiotics and/or antimicrobial  
28 dressings was found to be greater than that of a wound treated with neither, as the time to  
29 healing was longer. So too was resource use associated with managing the wounds that  
30 remained unhealed compared with those that went on to heal. Consequently, the cost of  
31 managing an unhealed wound was at least three time more than that of managing a healed  
32 wound (mean of £12,000 vs £40,600 per wound), and the cost of managing a wound not treated  
33 with antibiotics and/or antimicrobial dressings was at least 80% less than that of a wound  
34 treated with either. These findings are consistent with our Burden of Wounds study [3, 4, 28].  
35 The time to healing a wound is clearly an important factor in driving costs. Accordingly, the  
36 cost of burns wound management can be affected by a combination of resources required for  
37 dressing changes, complexity of some treatment regimens and infection. It is also noteworthy  
38 that the healing rate was higher among patients with a higher BMI, which was contrary to the  
39 healing rate among a cohort of patents with unhealed surgical wounds [26].  
40  
41  
42  
43  
44  
45  
46  
47  
48  
49  
50

51 This study provided insights into areas where improvements in clinical and service  
52 management could potentially enhance healing and other patient outcomes while reducing  
53 overall management costs. These are:  
54  
55

- 56 • Working to common definitions and reporting standards across primary and secondary  
57 care.  
58  
59  
60

- 1
- 2
- 3 • Integrating care across providers.
- 4
- 5 • Rational use of products with access to advanced wound treatments when necessary.
- 6
- 7 • Recognising comorbidity management as appropriate.
- 8
- 9

10 In turn, with improved healing, these actions should reduce workload and associated healthcare  
11 resource use and lead to reductions in the overall cost of wound care. All healthcare systems  
12 recognise the importance of managing patients with burns and the relative risk of developing  
13 an infection. Clearly, training non-specialist nurses in the appropriate management of burns  
14 wound care is a prerequisite to overcoming some of the problems encountered in clinical  
15 practice and to achieving better health outcomes than those currently being observed.  
16  
17

18  
19  
20  
21  
22 Forty-six per cent of all the burns in this study had healed by 12 months from the time of the  
23 injury. In comparison, we previously estimated that 53% of venous leg ulcers (VLUs) [30],  
24 35% of diabetic foot ulcers (DFUs) [27], 50% of community-acquired pressure ulcers (PU)  
25 (ranging from 100% for category 1 ulcers to 21% for category 4 ulcers) [25] and 83% of  
26 surgical wounds [26] healed within 12 months from the onset of community management. The  
27 12-monthly cost of a wound that healed was £3,000, £2,100, £5,100 and £6,000 for a VLU,  
28 DFU, community-acquired PU and surgical wound respectively [26, 30, 27, 25], compared  
29 with £8,800 for a healed burn. Additionally, the 12-monthly cost of a wound that remained  
30 healed by 12 months was £13,500, £8,800, £12,300 and £13,700 for a VLU, DFU, community-  
31 acquired PU and surgical wound respectively [26, 30, 27, 25], compared with £26,700 for an  
32 unhealed burn. The higher burn-associated costs reflect the higher proportion of these injuries  
33 that result in a hospital admission and the majority of the burns being managed in both hospital  
34 outpatient clinics as well as by community-based teams. The Authors were unable to find any  
35 recent studies reporting the cost of managing adult burns in the UK. In one earlier study, the  
36 mean treatment cost over the 2011/12 financial year associated with patients allocated to  
37 different burn-specific healthcare resource groups ranged from £2,528 to £31,871 (uprated to  
38 £3,088 and £36,074, respectively at 2017/18 prices) [49]. Comparison with our study may not  
39 be appropriate because of changes in patient management, hospital admission pathways and  
40 healthcare resource use over the intervening period. A systematic review of articles on burn-  
41 related costs published from 1950 to 2012 estimated the mean total healthcare cost per burn  
42 patient in high-income countries to be \$88,218 [£66,205] (range \$704-\$717,306 [£536-  
43 £546,447]) [50]. However, comparisons are ineligible because of differences in  
44 methodological approaches, patient pathways and unit costs.  
45  
46  
47  
48  
49  
50  
51  
52  
53  
54  
55  
56  
57  
58  
59  
60

## Study Limitations

The advantages and disadvantages of using patients' records in the THIN database for health economic studies in wound care have been previously discussed [3]. In summary, the advantage of using the database is that the patient pathways and associated resource use are based on real-world evidence derived from clinical practice. However, the analyses were based on clinicians' entries into their patients' records and inevitably subject to a certain amount of imprecision and lack of detail. Moreover, the computerised information in the database is collected by GPs and nursing teams for clinical care purposes and not for health economics research. Prescriptions issued by GPs and practice nurses are recorded in the database, but it does not specify whether the prescriptions were dispensed or detail patient compliance with the product. There may also be an under-recording of community-based clinician visits outside of the general practice. Despite these limitations, it is the authors' opinion that the real-world evidence contained in the THIN database has provided a useful perspective on the management of burns in clinical practice the UK and the associated costs.

The analysis was truncated at 24 months and does not consider the potential impact of those burns that remained unhealed beyond the study period. The analysis only considered NHS resource use and associated costs for the 'average patient' and was not stratified according to gender, comorbidities, disease-related factors and level of clinicians' skills. Costs incurred by non-NHS organisations (such as the provision of social care), patients' costs and indirect societal costs as a result of patients being absent from work were also excluded from the analysis.

## Conclusion

Due to incomplete documentation in the patients' records, it is difficult to say whether the time to healing was excessive or what other confounding factors may have contributed to the delayed healing. Nevertheless, this study indicates the need to educate general practice clinicians on the management and care of burns wounds. Furthermore, it is beholden on the burns community to determine how the poor healing rates can be improved. Clinical and economic benefits to both patients and the NHS could accrue from strategies that focus on

1  
2  
3 improving documentation in patients' records, the integration of care between different  
4 providers, wound healing rates and reducing infection.  
5  
6  
7  
8  
9  
10  
11  
12  
13  
14  
15  
16  
17  
18  
19  
20  
21  
22  
23  
24  
25  
26  
27  
28  
29  
30  
31  
32  
33  
34  
35  
36  
37  
38  
39  
40  
41  
42  
43  
44  
45  
46  
47  
48  
49  
50  
51  
52  
53  
54  
55  
56  
57  
58  
59  
60

For peer review only

## REFERENCES

1. Brusselaers N, Monstrey S, Vogelaers D, Hoste E, Blot S. Severe burn injury in Europe: a systematic review of the incidence, etiology, morbidity, and mortality. *Crit Care*. 2010;14(5):R188. doi:10.1186/cc9300.
2. Nair CKV, Gopinath V, Ashok VG. Demographic and socio-cultural aspects of burns patients admitted in a tertiary care centre. *International Surgery Journal*. 2017;4(7):2170. doi:10.18203/2349-2902.isj20172618.
3. Guest JF, Ayoub N, McIlwraith T, Uchegbu I, Gerrish A, Weidlich D et al. Health economic burden that wounds impose on the National Health Service in the UK. *BMJ Open*. 2015;5(12):e009283. doi:10.1136/bmjopen-2015-009283.
4. Guest JF, Ayoub N, McIlwraith T, Uchegbu I, Gerrish A, Weidlich D et al. Health economic burden that different wound types impose on the UK's National Health Service. *Int Wound J*. 2016. doi:10.1111/iwj.12603.
5. NHS England. Hospital episode statistics: England. <https://digital.nhs.uk/data-and-information/publications/statistical/hospital-admitted-patient-care-activity>.
6. Peck M, Molnar J, Swart D. A global plan for burn prevention and care. *Bull World Health Organ*. 2009;87(10):802-3. doi:10.2471/blt.08.059733.
7. Mock C, Peck M, Peden M, Krug E, Ahuja R, Albertyn H et al. A WHO plan for burn prevention and care. Geneva: World Health Organization; 2008.
8. World Health Organization. Burns Fact Sheet. 2018. <https://www.who.int/news-room/fact-sheets/detail/burns>.
9. Atiyeh BS, Hayek SN, Gunn SW. New technologies for burn wound closure and healing--review of the literature. *Burns*. 2005;31(8):944-56. doi:10.1016/j.burns.2005.08.023.
10. International Best Practice Guidelines: Wound Management in Diabetic Foot Ulcers. *Wounds International*. In: *Wounds International*. 2013. [www.woundsinternational.com](http://www.woundsinternational.com).
11. Rowan MP, Cancio LC, Elster EA, Burmeister DM, Rose LF, Natesan S et al. Burn wound healing and treatment: review and advancements. *Crit Care*. 2015;19:243. doi:10.1186/s13054-015-0961-2.
12. Avita Medical RECELL® System Health Economic Data Project USD \$28 Million in Annual Savings at a Single Major Burn Center Versus Standard of Care., 2019. <https://www.biospace.com/article/releases/avita-medical-recell-system-health-economic-data-project-usd-28-million-in-annual-savings-at-a-single-major-burn-center-versus-standard-of-care/>.



13. Metzdorff MT. Evidence-based medicine: what it is, what it isn't, and are we practicing it? *J Trauma Acute Care Surg.* 2013;75(6):927-35. doi:10.1097/TA.0b013e3182932bac.
14. Djulbegovic B, Elqayam S. Many faces of rationality: Implications of the great rationality debate for clinical decision-making. *J Eval Clin Pract.* 2017;23(5):915-22. doi:10.1111/jep.12788.
15. Flores O, Stockton K, Roberts JA, Muller MJ, Paratz JD. The efficacy and safety of adrenergic blockade after burn injury: A systematic review and meta-analysis. *J Trauma Acute Care Surg.* 2016;80(1):146-55. doi:10.1097/TA.0000000000000887.
16. Avni T, Levcovich A, Ad-El DD, Leibovici L, Paul M. Prophylactic antibiotics for burns patients: systematic review and meta-analysis. *BMJ (Clinical research ed).* 2010;340:c241. doi:10.1136/bmj.c241.
17. Aziz Z, Abu SF, Chong NJ. A systematic review of silver-containing dressings and topical silver agents (used with dressings) for burn wounds. *Burns.* 2012;38(3):307-18. doi:10.1016/j.burns.2011.09.020.
18. Klein MB, Goverman J, Hayden DL, Fagan SP, McDonald-Smith GP, Alexander AK et al. Benchmarking outcomes in the critically injured burn patient. *Ann Surg.* 2014;259(5):833-41. doi:10.1097/SLA.0000000000000438.
19. Pereira C, Murphy K, Herndon D. Outcome measures in burn care. Is mortality dead? *Burns.* 2004;30(8):761-71. doi:10.1016/j.burns.2004.05.012.
20. Holavanahalli RK, Helm PA, Kowalske KJ. Long-Term Outcomes in Patients Surviving Large Burns: The Musculoskeletal System. *J Burn Care Res.* 2016;37(4):243-54. doi:10.1097/BCR.0000000000000257.
21. Blak BT, Thompson M, Dattani H, Bourke A. Generalisability of The Health Improvement Network (THIN) database: demographics, chronic disease prevalence and mortality rates. *Inform Prim Care.* 2011;19(4):251-5.
22. Panca M, Cutting K, Guest JF. Clinical and cost-effectiveness of absorbent dressings in the treatment of highly exuding VLU. *J Wound Care.* 2013;22(3):109-18. doi:10.12968/jowc.2013.22.3.109.
23. Guest JF, Gerrish A, Ayoub N, Vowden K, Vowden P. Clinical outcomes and cost-effectiveness of three alternative compression systems used in the management of venous leg ulcers. *J Wound Care.* 2015;24(7):300-8. doi:10.12968/jowc.2015.24.7.300.
24. Guest JF, Fuller GW, Vowden P. Clinical outcomes and cost-effectiveness of three different compression systems in newly-diagnosed venous leg ulcers in the UK. *J Wound Care.* 2017;26(5):244-54. doi:10.12968/jowc.2017.26.5.244.

- 1  
2  
3 25. Guest JF, Fuller GW, Vowden P, Vowden KR. Cohort study evaluating pressure ulcer  
4 management in clinical practice in the UK following initial presentation in the community:  
5 costs and outcomes. *BMJ Open*. 2018;8(7):e021769. doi:10.1136/bmjopen-2018-021769.  
6  
7  
8 26. Guest JF, Fuller GW, Vowden P. Costs and outcomes in evaluating management of  
9 unhealed surgical wounds in the community in clinical practice in the UK: a cohort study. *BMJ*  
10 *Open*. 2018;8(12):e022591. doi:10.1136/bmjopen-2018-022591.  
11  
12 27. Guest JF, Fuller GW, Vowden P. Diabetic foot ulcer management in clinical practice in the  
13 UK: costs and outcomes. *Int Wound J*. 2018;15(1):43-52. doi:10.1111/iwj.12816.  
14  
15 28. Guest JF, Vowden K, Vowden P. The health economic burden that acute and chronic  
16 wounds impose on an average clinical commissioning group/health board in the UK. *J Wound*  
17 *Care*. 2017;26(6):292-303. doi:10.12968/jowc.2017.26.6.292.  
18  
19 29. Guest JF, Taylor RR, Vowden K, Vowden P. Relative cost-effectiveness of a skin  
20 protectant in managing venous leg ulcers in the UK. *J Wound Care*. 2012;21(8):389-98.  
21 doi:10.12968/jowc.2012.21.8.389.  
22  
23 30. Guest JF, Fuller GW, Vowden P. Venous leg ulcer management in clinical practice in the  
24 UK: costs and outcomes. *Int Wound J*. 2018;15(1):29-37. doi:10.1111/iwj.12814.  
25  
26 31. Curtis L, Burns A. Unit Costs of Health and Social Care 2018. University of Kent, Personal  
27 Social Services Research Unit, Canterbury. 2018. <https://kar.kent.ac.uk/70995/>. Accessed 25  
28 July 2019.  
29  
30 32. Department of Health. National Schedule of NHS reference costs 2017/18.  
31 <https://improvement.nhs.uk/resources/reference-costs/>. Accessed 25 July 2019.  
32  
33 33. Drug Tariff. Drug Tariff. 2018. <https://www.drugtariff.co.uk>. Accessed 25 July 2019.  
34  
35 34. Ramos-Gallardo G. Chronic Wounds in Burn Injury: A Case Report on Importance of  
36 Biofilms. *World J Plast Surg*. 2016;5(2):175-80.  
37  
38 35. Maher A. Establishing a consensus for the surgical management of chronic burn wounds:  
39 A randomised prospective comparative study. *Egypt J Plast Reconstr Surg*. 2009;33(1):31-7.  
40  
41 36. Edwards J. Burn Wound Chronicity – myth or reality? . *Wounds UK*. 2013;9(3):4-5.  
42  
43 37. Al-Mousawi AM, Mecott-Rivera GA, Jeschke MG, Herndon DN. Burn teams and burn  
44 centers: the importance of a comprehensive team approach to burn care. *Clin Plast Surg*.  
45 2009;36(4):547-54. doi:10.1016/j.cps.2009.05.015.  
46  
47 38. Wounds International. International Best Practice Guidelines: Effective skin and wound  
48 management of non-complex burns. . 2016.  
49 [https://www.woundsinternational.com/resources/details/best-practice-guidelines-effective-](https://www.woundsinternational.com/resources/details/best-practice-guidelines-effective-skin-and-wound-management-in-non-complex-burns)  
50 [skin-and-wound-management-in-non-complex-burns.](https://www.woundsinternational.com/resources/details/best-practice-guidelines-effective-skin-and-wound-management-in-non-complex-burns)  
51  
52  
53  
54  
55  
56  
57  
58  
59  
60

- 1  
2  
3  
4  
5  
6  
7  
8  
9  
10  
11  
12  
13  
14  
15  
16  
17  
18  
19  
20  
21  
22  
23  
24  
25  
26  
27  
28  
29  
30  
31  
32  
33  
34  
35  
36  
37  
38  
39  
40  
41  
42  
43  
44  
45  
46  
47  
48  
49  
50  
51  
52  
53  
54  
55  
56  
57  
58  
59  
60
39. The Queen's Nursing Institute. General Practice Nursing in the 21st Century: A Time of Opportunity. 2016. [https://www.qni.org.uk/wp-content/uploads/2016/09/gpn\\_c21\\_report.pdf](https://www.qni.org.uk/wp-content/uploads/2016/09/gpn_c21_report.pdf).
40. Edwards J. Developing a burns link nurse framework for minor burn management. *Wounds UK*. 2013;9(3):10-3.
41. Benson A, Dickson WA, Boyce DE. Burns. *BMJ (Clinical research ed)*. 2006;332(7542):649-52. doi:10.1136/bmj.332.7542.649.
42. Stylianou N, Buchan I, Dunn KW. A review of the international Burn Injury Database (iBID) for England and Wales: descriptive analysis of burn injuries 2003-2011. *BMJ Open*. 2015;5(2):e006184. doi:10.1136/bmjopen-2014-006184.
43. Edwards J. Use of Silvercel Non-Adherent on burn wounds: a case series. *Wounds UK* 2013. 2013;9:81-4.
44. Edwards-Jones V, Greenwood JE. What's new in burn microbiology? *Burns*. 2003;29(1):15-24. doi:10.1016/s0305-4179(02)00203-6.
45. Atiyeh BS, Ibrahim A, Hayek S, N. . Burn wound cleansing: an efficient evidence-based treatment modality or a ritualistic practice. *J Wound Technol* 2010;7:6-10.
46. Church D, Elsayed S, Reid O, Winston B, Lindsay R. Burn wound infections. *Clin Microbiol Rev*. 2006;19(2):403-34. doi:10.1128/CMR.19.2.403-434.2006.
47. Wasiak J, Cleland H, Campbell F, Spinks A. Dressings for superficial and partial thickness burns. *Cochrane Database Syst Rev*. 2013(3):CD002106. doi:10.1002/14651858.CD002106.pub4.
48. Norman G, Christie J, Liu Z, Westby MJ, Jefferies JM, Hudson T et al. Antiseptics for burns. *Cochrane Database Syst Rev*. 2017;7:CD011821. doi:10.1002/14651858.CD011821.pub2.
49. Jeevan R, Rashid A, Lymperopoulos NS, Wilkinson D, James MI. Mortality and treatment cost estimates for 1075 consecutive patients treated by a regional adult burn service over a five year period: the Liverpool experience. *Burns*. 2014;40(2):214-22. doi:10.1016/j.burns.2013.11.020.
50. Hop MJ, Polinder S, van der Vlies CH, Middelkoop E, van Baar ME. Costs of burn care: a systematic review. *Wound Repair Regen*. 2014;22(4):436-50. doi:10.1111/wrr.12189.

**Table 1. Patients' baseline characteristics (n=260 adult patients).**

|                                                    |                      |
|----------------------------------------------------|----------------------|
| Mean age at time of presentation (years)           | 57.8 (median 58.0)   |
| Percentage female                                  | 61%                  |
| Mean systolic blood pressure (mm Hg)               | 131.4 (median 132.0) |
| Mean diastolic blood pressure (mm Hg)              | 75.8 (median 76.5)   |
| Mean body mass index (BMI) (kg/m <sup>2</sup> )    | 30.2 (median 28.9)   |
| Percentage with BMI <20.0kg/m <sup>2</sup>         | 7%                   |
| Percentage with BMI ≥30.0kg/m <sup>2</sup>         | 41%                  |
| Percentage who were current smokers                | 24%                  |
| Percentage who were ex-smokers                     | 22%                  |
| Percentage who were non-smokers                    | 54%                  |
| <b>Percentage with the following comorbidities</b> |                      |
| Musculoskeletal                                    | 72%                  |
| Cardiovascular                                     | 64%                  |
| Endocrinological                                   | 50%                  |
| Respiratory                                        | 45%                  |
| Dermatological                                     | 43%                  |
| Psychiatric                                        | 40%                  |
| Gastroenterological                                | 37%                  |
| Neurological                                       | 29%                  |
| Genito-urinary                                     | 20%                  |
| Renal                                              | 20%                  |
| Oncological                                        | 19%                  |
| Ophthalmological                                   | 16%                  |
| Immunological                                      | 10%                  |
| Haematological                                     | 5%                   |
| <b>Percentage with the following burns</b>         |                      |
| Unspecified location and depth                     | 58.8%                |
| Hand (unspecified depth)                           | 12.9%                |
| Lower limb (unspecified depth)                     | 9.2%                 |
| Upper limb (unspecified depth)                     | 7.5%                 |
| Scald of unspecified location and depth            | 4.4%                 |
| Trunk (unspecified depth)                          | 3.4%                 |
| Face, head or neck (unspecified depth)             | 1.7%                 |
| Partial depth (unspecified location)               | 1.4%                 |
| Full depth (unspecified location)                  | 0.3%                 |

**Table 2: Health care resource use associated with managing burns in clinical practice (n=294 burns).**

| <b>Resource</b>                                                    | <b>Resource use over 24 months<br/>from initial presentation</b> |                                 |
|--------------------------------------------------------------------|------------------------------------------------------------------|---------------------------------|
|                                                                    | <b>Percentage of burns</b>                                       | <b>Mean number<br/>per burn</b> |
| Practice nurse visits                                              | 98%                                                              | 54.8                            |
| GP visits                                                          | 97%                                                              | 23.5                            |
| Outpatient clinic visits                                           | 91%                                                              | 22.2                            |
| District nurse visits                                              | 18%                                                              | 1.9                             |
| Accident & emergency attendances                                   | 34%                                                              | 1.9                             |
| Hospital admissions                                                | 28%                                                              | 0.9                             |
| Surgical admissions                                                | 4%                                                               | 0.05                            |
| Dressings                                                          | 55%                                                              | 457.8                           |
| Single dressings                                                   | 14%                                                              | 128.3                           |
| Multiple dressings                                                 | 41%                                                              | 672.0                           |
| Prescriptions for analgesics and non-steroidal anti-inflammatories | 68%                                                              | 8.7                             |

**Table 3: Prescribed dressings documented in the patients' records (n=294 burns).**

| Percentage of burns that were treated with the following dressing: |           |          |               |                  |      |              |          |               |                 |       |           |              |
|--------------------------------------------------------------------|-----------|----------|---------------|------------------|------|--------------|----------|---------------|-----------------|-------|-----------|--------------|
| Month of treatment                                                 | Absorbent | Alginate | Antimicrobial | Capillary-action | Foam | Hydrocolloid | Hydrogel | Low-adherence | Odour absorbent | Other | Permeable | Soft polymer |
| 1                                                                  | 12%       | 1%       | 6%            | 0%               | 6%   | 5%           | 1%       | 7%            | 0%              | 45%   | 9%        | 13%          |
| 2                                                                  | 3%        | 4%       | 3%            | 2%               | 4%   | 7%           | 4%       | 3%            | 2%              | 24%   | 1%        | 7%           |
| 3                                                                  | 8%        | 1%       | 3%            | 1%               | 5%   | 1%           | 5%       | 3%            | 1%              | 6%    | 2%        | 5%           |
| 4                                                                  | 5%        | 8%       | 3%            | 3%               | 3%   | 5%           | 2%       | 4%            | 2%              | 7%    | 3%        | 3%           |
| 5                                                                  | 4%        | 1%       | 4%            | 0%               | 8%   | 3%           | 4%       | 4%            | 5%              | 8%    | 1%        | 6%           |
| 6                                                                  | 5%        | 0%       | 1%            | 2%               | 3%   | 6%           | 1%       | 5%            | 0%              | 8%    | 3%        | 6%           |
| 7                                                                  | 7%        | 0%       | 1%            | 1%               | 9%   | 1%           | 3%       | 3%            | 2%              | 6%    | 3%        | 4%           |
| 8                                                                  | 4%        | 3%       | 2%            | 0%               | 2%   | 4%           | 1%       | 5%            | 1%              | 5%    | 1%        | 4%           |
| 9                                                                  | 4%        | 1%       | 5%            | 1%               | 2%   | 3%           | 4%       | 2%            | 3%              | 2%    | 3%        | 5%           |
| 10                                                                 | 6%        | 3%       | 3%            | 2%               | 3%   | 2%           | 2%       | 7%            | 0%              | 8%    | 1%        | 5%           |
| 11                                                                 | 4%        | 3%       | 5%            | 0%               | 7%   | 2%           | 2%       | 4%            | 5%              | 9%    | 4%        | 2%           |
| 12                                                                 | 5%        | 0%       | 7%            | 3%               | 3%   | 5%           | 2%       | 3%            | 1%              | 8%    | 1%        | 6%           |
| 13                                                                 | 6%        | 3%       | 3%            | 3%               | 3%   | 3%           | 3%       | 3%            | 1%              | 8%    | 3%        | 2%           |
| 14                                                                 | 9%        | 0%       | 8%            | 0%               | 3%   | 3%           | 1%       | 4%            | 1%              | 8%    | 3%        | 3%           |
| 15                                                                 | 5%        | 5%       | 1%            | 6%               | 0%   | 3%           | 1%       | 4%            | 3%              | 8%    | 3%        | 8%           |
| 16                                                                 | 5%        | 2%       | 7%            | 0%               | 3%   | 2%           | 0%       | 6%            | 1%              | 6%    | 5%        | 5%           |
| 17                                                                 | 9%        | 6%       | 3%            | 3%               | 6%   | 6%           | 0%       | 4%            | 2%              | 9%    | 9%        | 6%           |
| 18                                                                 | 7%        | 5%       | 9%            | 0%               | 8%   | 1%           | 4%       | 3%            | 4%              | 7%    | 2%        | 7%           |
| 19                                                                 | 5%        | 1%       | 7%            | 5%               | 2%   | 8%           | 0%       | 7%            | 1%              | 9%    | 2%        | 7%           |
| 20                                                                 | 8%        | 1%       | 5%            | 2%               | 7%   | 2%           | 5%       | 3%            | 3%              | 7%    | 3%        | 6%           |
| 21                                                                 | 5%        | 4%       | 5%            | 0%               | 4%   | 7%           | 0%       | 9%            | 2%              | 6%    | 1%        | 10%          |
| 22                                                                 | 8%        | 0%       | 5%            | 1%               | 1%   | 3%           | 5%       | 3%            | 8%              | 13%   | 5%        | 4%           |
| 23                                                                 | 12%       | 3%       | 7%            | 4%               | 6%   | 3%           | 3%       | 15%           | 1%              | 11%   | 4%        | 12%          |
| 24                                                                 | 6%        | 5%       | 8%            | 0%               | 10%  | 6%           | 0%       | 5%            | 3%              | 21%   | 16%       | 8%           |

**Table 4: Cost of health care resource use associated with managing burns (n=294) in clinical practice at 2017/18 prices (percentage of total cost is in parenthesis).**

| Resource                                                           | Mean cost of resource use per burn over 24 months from initial presentation |               |                   |               |                   |               |
|--------------------------------------------------------------------|-----------------------------------------------------------------------------|---------------|-------------------|---------------|-------------------|---------------|
|                                                                    | All burns                                                                   |               | Healed burns      |               | Unhealed burns    |               |
| Medical admissions (no surgery)                                    | £8,879.70                                                                   | (52%)         | £6,292.18         | (52%)         | £21,347.72        | (53%)         |
| Outpatient visits                                                  | £2,601.60                                                                   | (15%)         | £1,931.91         | (16%)         | £5,897.84         | (15%)         |
| GP visits                                                          | £2,004.80                                                                   | (12%)         | £1,501.41         | (13%)         | £4,488.47         | (11%)         |
| Practice nurse visits                                              | £1,314.30                                                                   | (8%)          | £975.89           | (8%)          | £2,976.36         | (7%)          |
| Dressings                                                          | £850.00                                                                     | (5%)          | £462.60           | (4%)          | £2,573.34         | (6%)          |
| Surgical admissions                                                | £524.70                                                                     | (3%)          | £323.42           | (3%)          | £1,449.60         | (4%)          |
| Accident & emergency                                               | £318.00                                                                     | (2%)          | £228.31           | (2%)          | £752.81           | (2%)          |
| Community nurse visits                                             | £117.40                                                                     | (1%)          | £59.69            | (0%)          | £356.33           | (1%)          |
| Bandages                                                           | £120.40                                                                     | (1%)          | £76.82            | (1%)          | £322.52           | (1%)          |
| Prescriptions for analgesics and non-steroidal anti-inflammatories | £150.90                                                                     | (1%)          | £119.37           | (1%)          | £313.96           | (1%)          |
| Other wound care products                                          | £34.70                                                                      | (0%)          | £25.11            | (0%)          | £81.35            | (0%)          |
| Ambulance                                                          | £5.70                                                                       | (0%)          | £4.80             | (0%)          | £10.75            | (0%)          |
| Laboratory tests                                                   | £1.70                                                                       | (0%)          | £0.82             | (0%)          | £5.61             | (0%)          |
| <b>TOTAL</b>                                                       | <b>£16,923.90</b>                                                           | <b>(100%)</b> | <b>£12,002.33</b> | <b>(100%)</b> | <b>£40,576.66</b> | <b>(100%)</b> |

**Table 5: Cost of Wound Care Stratified by Infection Management.**

|                                                                           | <b>Percentage<br/>of cohort</b> | <b>Percentage<br/>healed</b> | <b>Time to healing<br/>(months)</b> | <b>Mean cost<br/>of care</b> |
|---------------------------------------------------------------------------|---------------------------------|------------------------------|-------------------------------------|------------------------------|
| No evidence of having received antibiotics and/or antimicrobial dressings | 40%                             | 69%                          | 3.4                                 | £4,379                       |
| Recorded as having received antibiotics and/or antimicrobial dressings    | 60%                             | 66%                          | 11.2                                | £26,671                      |
| Recorded as having received only antibiotics                              | 43%                             | 71%                          | 10.7                                | £24,396                      |
| Recorded as having received only antimicrobial dressings                  | 4%                              | 50%                          | 5.1                                 | £12,606                      |
| Recorded as having received antibiotics and antimicrobial dressings       | 13%                             | 48%                          | 12.9                                | £38,406                      |



**Table 6: Cost of Wound Care Stratified by Body Mass Index.**

|           | <b>% of patients</b> | <b>% healed</b> | <b>NHS cost per patient</b> |
|-----------|----------------------|-----------------|-----------------------------|
| BMI <20   | 7%                   | 55%             | £9,411                      |
| BMI 20-29 | 41%                  | 66%             | £11,485                     |
| BMI 30-35 | 27%                  | 74%             | £15,143                     |
| BMI >35   | 20%                  | 83%             | £20,049                     |

For peer review only

1  
2  
3  
4  
5  
6  
7  
8  
9  
10  
11  
12  
13  
14  
15  
16  
17  
18  
19  
20  
21  
22  
23  
24  
25  
26  
27  
28  
29  
30  
31  
32  
33  
34  
35  
36  
37  
38  
39  
40  
41  
42  
43  
44  
45  
46

1  
2  
3 **Figure 1: Wound Healing**  
4

5 **Figure 2: Patients who Received Multiple Dressings.**  
6

7 **Figure 3: Monthly NHS Cost of Wound Care at 2017/18 Prices.**  
8

9 **Figure 4: Kaplan Meier Analysis of Infection.**  
10  
11

12 **Figure 5. Kaplan Meier Analysis of Body Mass Index.**  
13  
14  
15  
16  
17  
18  
19  
20  
21  
22  
23  
24  
25  
26  
27  
28  
29  
30  
31  
32  
33  
34  
35  
36  
37  
38  
39  
40  
41  
42  
43  
44  
45  
46  
47  
48  
49  
50  
51  
52  
53  
54  
55  
56  
57  
58  
59  
60

For peer review only

1  
2  
3  
4  
5  
6  
7  
8  
9  
10  
11  
12  
13  
14  
15  
16  
17  
18  
19  
20  
21  
22  
23  
24  
25  
26  
27  
28  
29  
30  
31  
32  
33  
34  
35  
36  
37  
38  
39  
40  
41  
42  
43  
44  
45  
46  
47  
48  
49  
50  
51  
52  
53  
54  
55  
56  
57  
58  
59  
60

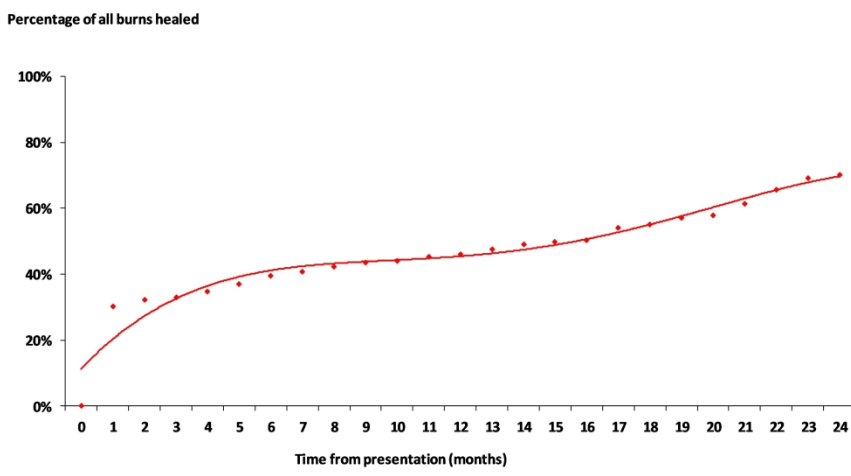

Figure 1

275x190mm (336 x 336 DPI)

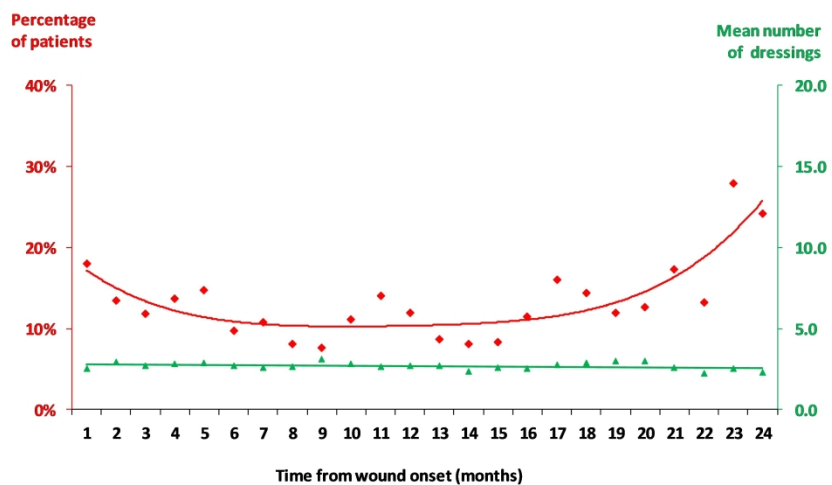

Figure 2

275x190mm (336 x 336 DPI)

1  
2  
3  
4  
5  
6  
7  
8  
9  
10  
11  
12  
13  
14  
15  
16  
17  
18  
19  
20  
21  
22  
23  
24  
25  
26  
27  
28  
29  
30  
31  
32  
33  
34  
35  
36  
37  
38  
39  
40  
41  
42  
43  
44  
45  
46  
47  
48  
49  
50  
51  
52  
53  
54  
55  
56  
57  
58  
59  
60

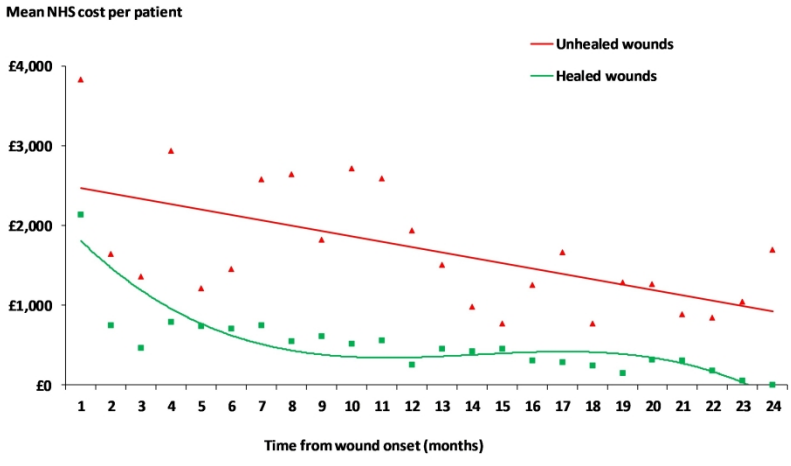

Figure 3

275x190mm (336 x 336 DPI)

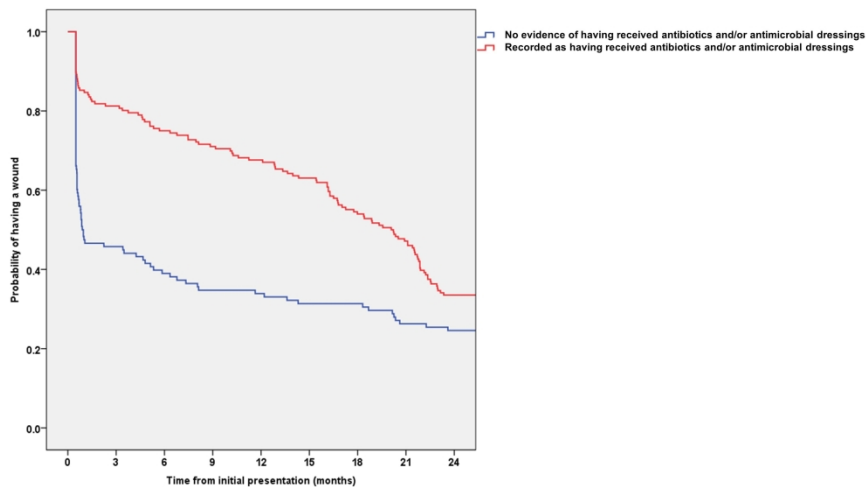

Figure 4

275x190mm (300 x 300 DPI)

1  
2  
3  
4  
5  
6  
7  
8  
9  
10  
11  
12  
13  
14  
15  
16  
17  
18  
19  
20  
21  
22  
23  
24  
25  
26  
27  
28  
29  
30  
31  
32  
33  
34  
35  
36  
37  
38  
39  
40  
41  
42  
43  
44  
45  
46  
47  
48  
49  
50  
51  
52  
53  
54  
55  
56  
57  
58  
59  
60

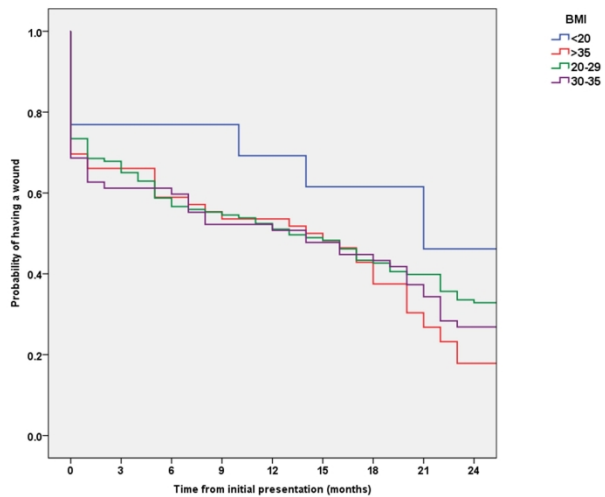

Figure 5

275x190mm (336 x 336 DPI)

STROBE Statement—Checklist of items that should be included in reports of *cohort studies*

| Section/Topic                | Item # | Recommendation                                                                                                                                                                                    | Reported on page # |
|------------------------------|--------|---------------------------------------------------------------------------------------------------------------------------------------------------------------------------------------------------|--------------------|
| Title and abstract           | 1      | (a) Indicate the study's design with a commonly used term in the title or the abstract                                                                                                            | 1,8                |
|                              |        | (b) Provide in the abstract an informative and balanced summary of what was done and what was found                                                                                               | 1                  |
| <b>Introduction</b>          |        |                                                                                                                                                                                                   |                    |
| Background/rationale         | 2      | Explain the scientific background and rationale for the investigation being reported                                                                                                              | 6                  |
| Objectives                   | 3      | State specific objectives, including any prespecified hypotheses                                                                                                                                  | 6,7                |
| <b>Methods</b>               |        |                                                                                                                                                                                                   |                    |
| Study design                 | 4      | Present key elements of study design early in the paper                                                                                                                                           | 8                  |
| Setting                      | 5      | Describe the setting, locations, and relevant dates, including periods of recruitment, exposure, follow-up, and data collection                                                                   | 8,9                |
| Participants                 | 6      | (a) Give the eligibility criteria, and the sources and methods of selection of participants. Describe methods of follow-up                                                                        | 8,9                |
|                              |        | (b) For matched studies, give matching criteria and number of exposed and unexposed                                                                                                               |                    |
| Variables                    | 7      | Clearly define all outcomes, exposures, predictors, potential confounders, and effect modifiers. Give diagnostic criteria, if applicable                                                          | 8,9                |
| Data sources/<br>measurement | 8*     | For each variable of interest, give sources of data and details of methods of assessment (measurement). Describe comparability of assessment methods if there is more than one group              | 8,9                |
| Bias                         | 9      | Describe any efforts to address potential sources of bias                                                                                                                                         | 9,10               |
| Study size                   | 10     | Explain how the study size was arrived at                                                                                                                                                         | 9                  |
| Quantitative variables       | 11     | Explain how quantitative variables were handled in the analyses. If applicable, describe which groupings were chosen and why                                                                      | 9,10               |
| Statistical methods          | 12     | (a) Describe all statistical methods, including those used to control for confounding                                                                                                             | 10                 |
|                              |        | (b) Describe any methods used to examine subgroups and interactions                                                                                                                               | 10                 |
|                              |        | (c) Explain how missing data were addressed                                                                                                                                                       | N/A                |
|                              |        | (d) If applicable, explain how loss to follow-up was addressed                                                                                                                                    | N/A                |
|                              |        | (e) Describe any sensitivity analyses                                                                                                                                                             | 10                 |
| <b>Results</b>               |        |                                                                                                                                                                                                   |                    |
| Participants                 | 13*    | (a) Report numbers of individuals at each stage of study—eg numbers potentially eligible, examined for eligibility, confirmed eligible, included in the study, completing follow-up, and analysed | 11                 |
|                              |        | (b) Give reasons for non-participation at each stage                                                                                                                                              | N/A                |
|                              |        | (c) Consider use of a flow diagram                                                                                                                                                                | N/A                |



|                          |     |                                                                                                                                                                                                              |                      |
|--------------------------|-----|--------------------------------------------------------------------------------------------------------------------------------------------------------------------------------------------------------------|----------------------|
| Descriptive data         | 14* | (a) Give characteristics of study participants (eg demographic, clinical, social) and information on exposures and potential confounders                                                                     | 11,26                |
|                          |     | (b) Indicate number of participants with missing data for each variable of interest                                                                                                                          | N/A                  |
|                          |     | (c) Summarise follow-up time (eg, average and total amount)                                                                                                                                                  | 11,12                |
| Outcome data             | 15* | Report numbers of outcome events or summary measures over time                                                                                                                                               | 11,26<br>Figures 1-5 |
| Main results             | 16  | (a) Give unadjusted estimates and, if applicable, confounder-adjusted estimates and their precision (eg, 95% confidence interval). Make clear which confounders were adjusted for and why they were included | 11-14<br>27-31       |
|                          |     | (b) Report category boundaries when continuous variables were categorized                                                                                                                                    | N/A                  |
|                          |     | (c) If relevant, consider translating estimates of relative risk into absolute risk for a meaningful time period                                                                                             | N/A                  |
| Other analyses           | 17  | Report other analyses done—eg analyses of subgroups and interactions, and sensitivity analyses                                                                                                               | 13,14,30,31          |
| <b>Discussion</b>        |     |                                                                                                                                                                                                              |                      |
| Key results              | 18  | Summarise key results with reference to study objectives                                                                                                                                                     | 15-19                |
| Limitations              | 19  | Discuss limitations of the study, taking into account sources of potential bias or imprecision. Discuss both direction and magnitude of any potential bias                                                   | 15-20                |
| Interpretation           | 20  | Give a cautious overall interpretation of results considering objectives, limitations, multiplicity of analyses, results from similar studies, and other relevant evidence                                   | 15-19                |
| Generalisability         | 21  | Discuss the generalisability (external validity) of the study results                                                                                                                                        | 15-19                |
| <b>Other information</b> |     |                                                                                                                                                                                                              |                      |
| Funding                  | 22  | Give the source of funding and the role of the funders for the present study and, if applicable, for the original study on which the present article is based                                                | 3                    |

\*Give information separately for exposed and unexposed groups.

**Note:** An Explanation and Elaboration article discusses each checklist item and gives methodological background and published examples of transparent reporting. The STROBE checklist is best used in conjunction with this article (freely available on the Web sites of PLoS Medicine at <http://www.plosmedicine.org/>, Annals of Internal Medicine at <http://www.annals.org/>, and Epidemiology at <http://www.epidem.com/>). Information on the STROBE Initiative is available at <http://www.strobe-statement.org>.

# BMJ Open

## A COHORT STUDY EVALUATING MANAGEMENT OF BURNS IN THE COMMUNITY IN CLINICAL PRACTICE IN THE UK: COSTS AND OUTCOMES

|                                 |                                                                                                                                                                |
|---------------------------------|----------------------------------------------------------------------------------------------------------------------------------------------------------------|
| Journal:                        | <i>BMJ Open</i>                                                                                                                                                |
| Manuscript ID                   | bmjopen-2019-035345.R2                                                                                                                                         |
| Article Type:                   | Original research                                                                                                                                              |
| Date Submitted by the Author:   | 20-Feb-2020                                                                                                                                                    |
| Complete List of Authors:       | Guest, Julian F.; Catalyst Consultants; King's College London, Fuller, Graham; Catalyst Consultants Edwards, Jacky; Manchester University NHS Foundation Trust |
| <b>Primary Subject Heading</b>: | Health economics                                                                                                                                               |
| Secondary Subject Heading:      | Health services research                                                                                                                                       |
| Keywords:                       | HEALTH ECONOMICS, TRAUMA MANAGEMENT, WOUND MANAGEMENT                                                                                                          |
|                                 |                                                                                                                                                                |

SCHOLARONE™  
Manuscripts



I, the Submitting Author has the right to grant and does grant on behalf of all authors of the Work (as defined in the below author licence), an exclusive licence and/or a non-exclusive licence for contributions from authors who are: i) UK Crown employees; ii) where BMJ has agreed a CC-BY licence shall apply, and/or iii) in accordance with the terms applicable for US Federal Government officers or employees acting as part of their official duties; on a worldwide, perpetual, irrevocable, royalty-free basis to BMJ Publishing Group Ltd ("BMJ") its licensees and where the relevant Journal is co-owned by BMJ to the co-owners of the Journal, to publish the Work in this journal and any other BMJ products and to exploit all rights, as set out in our [licence](#).

The Submitting Author accepts and understands that any supply made under these terms is made by BMJ to the Submitting Author unless you are acting as an employee on behalf of your employer or a postgraduate student of an affiliated institution which is paying any applicable article publishing charge ("APC") for Open Access articles. Where the Submitting Author wishes to make the Work available on an Open Access basis (and intends to pay the relevant APC), the terms of reuse of such Open Access shall be governed by a Creative Commons licence – details of these licences and which [Creative Commons](#) licence will apply to this Work are set out in our licence referred to above.

Other than as permitted in any relevant BMJ Author's Self Archiving Policies, I confirm this Work has not been accepted for publication elsewhere, is not being considered for publication elsewhere and does not duplicate material already published. I confirm all authors consent to publication of this Work and authorise the granting of this licence.

**ORIGINAL ARTICLE****A COHORT STUDY EVALUATING MANAGEMENT OF BURNS IN THE  
COMMUNITY IN CLINICAL PRACTICE IN THE UK:  
COSTS AND OUTCOMES****Julian F Guest<sup>1,2</sup>, Graham W Fuller<sup>1</sup>, Jacky Edwards<sup>3</sup>****<sup>1</sup> Catalyst Health Economics Consultants, Rickmansworth, UK****<sup>2</sup> Faculty of Life Sciences and Medicine, King's College, London, UK****<sup>3</sup> Manchester Foundation Trust, Manchester, UK****Correspondence to:**

Professor Julian F Guest

CATALYST Health Economics Consultants

7 Gilham Court

Ebury Road

Rickmansworth

Hertfordshire WD3 1FZ

UK

Tel: +44 (0) 1923 450045

E-mail: julian.guest@catalyst-health.com

**Running title:** Health economic impact of burns in the UK**Keywords:** Burden; burns; cost; wounds; UK.

## ABSTRACT

**Objective:** To evaluate health outcomes, resource use and corresponding costs attributable to managing burns in clinical practice, from initial presentation, among a cohort of adults in the UK.

**Design:** Retrospective cohort analysis of the records of a randomly selected cohort of 260 patients from the THIN database who had 294 evaluable burns.

**Setting:** Primary and secondary care sectors in the UK.

**Primary and Secondary Outcome Measures:** Patients' characteristics, wound-related health outcomes, health care resource use, and total National Health Service (NHS) cost of patient management.

**Results:** Diagnosis was incomplete in 63% of patients' records since the location, depth and size of the burns was missing. Overall, 70% of all the burns healed within 24 months and the time to healing was a mean of 7.8 months per burn. Sixty-six per cent of burns were initially managed in the community and the other 34% were managed at Accident and Emergency departments. Patients' wounds were subsequently managed predominantly by practice nurses and hospital outpatient clinics. Forty-five percent of burns had no documented dressings in the patients' records. The mean NHS cost of wound care in clinical practice over 24 months from initial presentation was an estimated £16,924 per burn, ranging from £12,002 and £40,577 for a healed and unhealed wound, respectively.

**Conclusion:** Due to incomplete documentation in the patients' records, it is difficult to say whether the time to healing was excessive or what other confounding factors may have contributed to the delayed healing. This study indicates the need for education of general practice clinicians on the management and care of burn wounds. Furthermore, it is beholden on the burns community to determine how the poor healing rates can be improved. Strategies are required to improve documentation in patients' records, integration of care between different providers, wound healing rates and reducing infection.

## STRENGTHS AND LIMITATIONS OF THIS STUDY

- This is the first study to evaluate patient pathways and associated health outcomes, resource use and corresponding costs attributable to managing burns across both primary and secondary care over 24 months from initial presentation.
- This study undertaken using real world evidence derived from the anonymised records of a sample of patients in The Health Improvement Network (THIN) database (a nationally representative database of clinical practice among >11 million patients registered with general practitioners in the UK).
- The estimates were derived following a systematic analysis of patients' characteristics, wound-related health outcomes and all primary and secondary care resource use contained in the patients' electronic records.
- Computerised information in the THIN database is collected by general practitioners for clinical care purposes and not for research, consequently the accuracy of wound descriptors and other terminology have not been validated, but does reflect real world documentation in clinical practice.
- The analysis does not consider the potential impact of those wounds that remained unhealed beyond the study period.

1  
2  
3 **FUNDING**  
4

5  
6 This study was funded by J.F.G., the lead author, without any external support.  
7  
8  
9

10  
11 **COMPETING INTERESTS**  
12  
13

14  
15 None declared.  
16  
17  
18  
19  
20  
21  
22  
23  
24  
25  
26  
27  
28  
29  
30  
31  
32  
33  
34  
35  
36  
37  
38  
39  
40  
41  
42  
43  
44  
45  
46  
47  
48  
49  
50  
51  
52  
53  
54  
55  
56  
57  
58  
59  
60

For peer review only

## CONTRIBUTORS

J.F.G. designed the study, managed the analyses, performed some analyses, checked all the other analyses, and wrote the manuscript.

G.W.F. conducted much of the analyses.

J.E. scrutinised the analyses, suggested further analyses and helped interpret some of the findings.

All the authors were involved in revising the manuscript and gave final approval. J.F.G. is the guarantor of this work and, as such, had full access to all the data in the study and takes responsibility for the integrity of the data and the accuracy of the data analysis.



## **ETHICS APPROVAL**

Ethics approval to use anonymised patients' records from the THIN database for this study was obtained from the Research Ethics Committee that appraises studies using the THIN database (reference number 13-061).

## **DATA SHARING STATEMENT**

The THIN data set cannot be shared as this restriction was a condition of the ethics approval obtained from the Research Ethics Committee (reference number 13-061). Questions concerning the data underlying the results can be sent to the Corresponding Author.

## INTRODUCTION

Burns are a serious pathology, potentially leading to severe morbidity and significant mortality. [1]. They can also be among the most expensive traumatic injuries to manage, generating a substantial health-economic impact [1, 2]. In 2012/13 the UK's National Health Service managed an estimated 87,000 burns (excluding chemical and electrical burns) among adults at a cost of £90 million [3, 4]. In that year, there were approximately 20,000 adult burns-related admissions into hospitals in England, of which 20% of descriptions lacked specificity [5]. In 2017/18, this increased to 23,500 adult burns-related admissions into hospitals in England, of which 30% of descriptions lacked specificity [5]. Globally, millions of individuals suffer from burn-related injuries each year [6], and up to 200,000 people die from these injuries, the majority of which occur in low- and middle-income countries [7, 8].

In addition to the economic impact, burns-related injuries can result in functional, psychological and social effects on both survivors and their families. Moreover, non-fatal burns are a leading cause of morbidity, disfigurement and disability, often leading to social stigma and rejection [8]. There are multiple strategies for managing burns and the associated impact on patient physiology, with new care pathways and technology being introduced on a regular basis [9-12].

A clinician's treatment of choice should be tailored to each patient using updated high quality scientific evidence [13, 14]. Nevertheless, despite the increasing numbers of published randomised controlled trials in burn care, systematic reviews have not provided sufficient evidence to support many commonly used interventions or management strategies [15-17]. Patients who experience a burn represent a heterogeneous population, with variations in age, mechanism of injury, depth, site and size of burn. Hence, selecting the most important outcomes to measure in burn care is challenging [18, 19]. Moreover, the follow-up period at which outcomes are measured may also determine the metrics to be assessed, which can include healing time, skin-graft loss, infection rates as well as functional, cosmetic and psychological issues [20].

Despite this, the Authors were unable to find any published evidence on the management of burns and time to healing in clinical practice across the primary and secondary care sectors in the UK. Accordingly, the objective of the present analysis was to follow a cohort of adult

1  
2  
3 patients in clinical practice from initial presentation of their burn to evaluate in greater detail  
4  
5 how patients are managed and its impact on healing and NHS costs  
6  
7  
8  
9  
10  
11  
12  
13  
14  
15  
16  
17  
18  
19  
20  
21  
22  
23  
24  
25  
26  
27  
28  
29  
30  
31  
32  
33  
34  
35  
36  
37  
38  
39  
40  
41  
42  
43  
44  
45  
46  
47  
48  
49  
50  
51  
52  
53  
54  
55  
56  
57  
58  
59  
60

For peer review only

## METHODS

### Study Design

This was a retrospective cohort analysis of the case records of adult patients with a burn randomly extracted from The Health Improvement Network (THIN) database. The perspective of the analysis was the NHS' primary and secondary care sectors in the UK and the time horizon was 24 months from initial presentation in the community.

### THIN Database

The THIN database contains longitudinal electronic records on >11 million anonymised patients entered by general practitioners (GPs) from >560 practices across the UK. The patient composition within the THIN database has been shown to be representative of the UK population in terms of demographics and disease distribution [21] and the database theoretically contains patients' entire medical history. In particular, the database collects data on the dates that patients registered or left their practice as well as demographic data such as date of birth and gender. Patients who reside at the same address or are members of the same family can be linked using a household identifier, provided they are registered with the same GP practice.

All medical conditions and symptoms recorded electronically during a patient's consultation in the general practice are recorded in the THIN database, thereby building up long computerised medical histories using Read codes. GP prescribing is computerised and entered directly into the database. Prescriptions not issued electronically (e.g. during home visits) are also entered, however there is a possibility of under-recording of such items. Information is also recorded on referrals to secondary care, including the specialty. Secondary care information and other medically-related information received by the practice is entered into the database. This includes details on hospital admissions, discharge medication, diagnosis, outpatient consultations, investigations and treatment outcomes. Details from other health care interventions, such as information on lifestyle and preventative healthcare, as well as a range of variables such as height, weight, body mass index, blood pressure, smoking and alcohol status, immunisation and laboratory test results are also recorded. Hence, the information contained in the THIN database reflects actual clinical practice.

(THIN is a registered trademark of Cegedim SA in the United Kingdom and other countries. Reference made to the THIN database is intended to be descriptive of the data asset licensed by IQVIA).

## Study Population

The authors had previously obtained a random sample of records of 6,000 adult patients with a documented history of a wound for whatever reason from the THIN database, for previous wound studies [3, 4, 22-30]. The study population of 260 patients was identified within this cohort of 6,000 patients according to the following criteria:

- Were 18 years of age or over.
- Had a Read code for a burn including a scald either during or after 2012.
- Had continuous medical history in their case record from the first mention of their wound unless it healed.
- Patients with a Read code for a chemical or electric burn were excluded from the data set, and so too were those with a Read code for sunburn.
- Patients with a Read code for a dermatological tumour were also excluded from the data set.
- Any patients with a Read code for a burn who died within two years of initial presentation were also excluded, since the study design was to examine the trajectory of these wounds over a full 24 months from initial presentation unless it healed.

## Patient and Public Involvement

Patients and members of the public were not directly involved in this study. The study population was limited to the anonymised records of patients in the THIN database.

## Study Variables and Statistical Analyses

Information was systematically extracted from the patients' electronic records over a period of 24 months from initial presentation. This included patients' characteristics, comorbidities (defined as a non-acute condition that patients were suffering from in the year before their burn), wound-related healthcare resource use (i.e. dressings, bandages, topical treatments, district nurse visits (who provide care within a patient's home), practice nurse visits (who

1  
2  
3 provide care within a GP's surgery), GP visits, hospital outpatient visits, hospital admissions,  
4 laboratory tests, GP prescribed medication (i.e. analgesics, non-steroidal anti-inflammatory  
5 drugs (NSAIDs) and systemic anti-infectives (principally antibiotics)) and clinical outcomes  
6 (i.e. healing and putative infection). No assumptions were made regarding missing data and  
7 there were no interpolations.  
8  
9  
10

11  
12  
13 Differences between two subgroups were tested for statistical significance using a Mann-  
14 Whitney U test or  $\chi^2$  test. Differences between three subgroups were tested for statistical  
15 significance using a Kruskal-Wallis test or  $\chi^2$  test. Binary logistic regression investigated  
16 relationships between baseline variables and clinical outcomes. Kaplan-Meier analyses were  
17 undertaken to compare the healing distribution of different subgroups. The p values <0.05 were  
18 considered statistically significant and have been reported. All p values  $\geq 0.05$  were not  
19 considered to be statistically significant and these numerical values have not been reported. All  
20 statistical analyses were performed using IBM SPSS Statistics (IBM UK).  
21  
22  
23  
24  
25  
26  
27  
28

### 29 **Cost of Patient Management**

30  
31  
32 The NHS cost of wound care for each burn was estimated by assigning unit costs at 2017/2018  
33 prices [31-33] to the quantity of healthcare resource used to manage individual burns. The  
34 mean cost of utilisation of each healthcare resource was then combined in order to estimate the  
35 mean NHS cost of managing a burn over 24 months from initial presentation. Accordingly, the  
36 study only considers the cost of wound management and does not estimate patients' overall  
37 healthcare costs.  
38  
39  
40  
41  
42  
43

### 44 **Sensitivity Analyses**

45  
46  
47 Deterministic sensitivity analyses were undertaken to assess how the cost of managing a burn  
48 changes by varying the values of clinical outcomes and resource use.  
49  
50  
51  
52  
53  
54  
55  
56  
57  
58  
59  
60

## RESULTS

### Patients' Characteristics

The study population comprised the anonymised case records of a randomly selected cohort of 260 adult patients from the THIN database who had a burn. According to the records, 26 of these patients had 2 or more burns, resulting in 294 evaluable burns.

The patients' age in the data set was a mean of  $57.8 \pm 18.4$  years per patient, and 61% were female. Patients had a mean of 4.7 comorbidities and 30% of patients had diabetes. Characterisation of the burns in the patients' records was poor since 63% of them lacked documentary evidence of location, depth and size. Patients' baseline characteristics are summarised in Table 1.

Seventeen percent of the wounds were documented as being either scalds or hand burns. An estimated 30% of these burns occurred in the spring and <20% occurred in the summer months. The other wounds occurred with a greater frequency in the winter and spring months.

### Clinical outcomes

In accordance with the study's inclusion criteria, all the patients in our data set survived the period of 24 months following initial presentation. The THIN database does not define what a wound is, nor does it define wound healing. Wound healing was a clinical observation documented in the patient's record by their managing clinician, but not necessarily confirmed by a specialist, and it is unknown if the clinicians who managed these patients used any consistent definition. Nevertheless, an episode of care was not a proxy for time to healing. On that basis, 30% of all the burns healed within 1 month, 39% within 6 months, 46% within 12 months and a further 24% by 24 months (a total of 70% healed within 24 months; Figure 1), and the time to healing among the healed wounds was a mean of 7.8 months per burn. More specifically, 9% of all the burns were managed exclusively in primary care and they all healed within 2 months. A total of 77% of all the burns managed by the burns services healed and their time to healing was a mean of 8.8 months per burn, whereas 50% of the burns managed by plastics services healed and their time to healing was a mean of 15 months per burn. Of the wounds managed by a non-specified service 66% healed and their mean time to healing was

1  
2  
3 8.6 months. There were minimal differences in the comorbidity profile between patients whose  
4 wound healed and those that remained unhealed. However, >25% of patients with a  
5 documented scald or hand burn had an ophthalmological comorbidity compared with 16% of  
6 patients with other wounds ( $p < 0.03$ ).  
7  
8  
9

## 10 **Patient Management**

11  
12  
13  
14  
15 According to the records, 66% of burns were initially managed in the community at a patient's  
16 general practice before being referred to a hospital outpatient clinic. The other 34% were  
17 managed at Accident and Emergency departments. Of the patients who were managed at  
18 Accident and Emergency departments 15% were subsequently admitted into hospital (of which  
19 1% underwent surgery) and 19% were managed as outpatients. Over the 24 months from the  
20 burn injury, patients were predominantly managed by practice nurses and seen in a hospital  
21 outpatient clinic between 1 and 4 times a month until the wound healed. Ongoing resource use  
22 after initial presentation is summarised in Table 2.  
23  
24  
25  
26  
27  
28  
29

30  
31 Fifty-five percent of the burns were treated with dressings and the other 45% had no  
32 documented evidence in the patients' records of dressings having been used. Table 3  
33 summarises the dressings that were prescribed. Up to 41% of burns were treated with multiple  
34 dressings (mean of 2.7 dressings per burn). Documentation in the patients' records suggests  
35 that patients would receive a dressing in a hospital outpatient clinic, but after subsequent  
36 attendance at their general practice they would either receive a combination of dressings or no  
37 dressings at all. Furthermore, the percentage of patients who received multiple dressings  
38 increased the longer the patient had their wound (Figure 2).  
39  
40  
41  
42  
43  
44  
45

## 46 **Cost of Patient Management**

47  
48  
49 The mean NHS cost of wound care in clinical practice over 24 months was an estimated  
50 £16,924 per burn. However, the cost of managing an unhealed burn was significantly more  
51 than that of managing a healed burn (£12,002 versus £40,577;  $p < 0.001$ ) (Table 4). Hospital  
52 admissions were the primary cost driver and accounted for 52% of the cost of wound  
53 management. Hospital outpatient visits and general practice visits were the secondary cost  
54 drivers accounting for 15% and 12% respectively. Dressings and bandages accounted for up to  
55 6% of the cost of wound management. Of the total NHS cost of managing a burn, 27% was  
56  
57  
58  
59  
60



1  
2  
3 incurred in the community and the remainder in secondary care. Furthermore, the distribution  
4 of costs was unaffected by whether the wound healed. Figure 3 illustrates how the monthly  
5 cost of wound management decreased for both healed and unhealed burns.  
6  
7  
8  
9

### 10 **Antimicrobial Dressings and Antibiotics**

11  
12  
13 Sixty percent of the burns were recorded as being treated with either an antimicrobial dressing  
14 or systemic antibiotic or a combination of both. The other 40% of burns had no documented  
15 evidence of having received either in the patients' records. (Table 5). The healing rate was  
16 similar among both groups. However, the time to healing was substantially longer among those  
17 burns that were recorded as having been treated with an antimicrobial dressing and/or an  
18 antibiotic and the cost of wound management increased accordingly (Table 5).  
19  
20  
21  
22  
23  
24  
25

26 Kaplan-Meier analyses demonstrated that the time to healing distribution was significantly  
27 different between wounds in the two groups ( $p < 0.001$ ) even though there was no significant  
28 difference in the overall probability of being healed by 24 months (Figure 4).  
29  
30  
31  
32

### 33 **Body Mass Index (BMI)**

34  
35  
36 The healing rate increased in parallel with increasing BMI, and so too did the cost of wound  
37 management (Table 6). Kaplan-Meier analyses (Figure 5) demonstrated that the time to healing  
38 distribution was not significantly different between patients with a different BMI ( $p = 0.191$ ),  
39 and even though the probability of healing among those with a BMI  $\geq 20\text{kg/m}^2$  was  
40 approximately a third more than those with a BMI  $< 20\text{kg/m}^2$ , the Odds ratio did not reach  
41 statistical significance. The lack of statistical significance between those with a BMI  $\geq 20\text{kg/m}^2$   
42 and those with a BMI  $< 20\text{kg/m}^2$  may be due to the small sample size. A retrospective power  
43 calculation estimated that 125 patients in each group would be required to demonstrate this  
44 observation with 80% power and a Type 1 error of 0.05.  
45  
46  
47  
48  
49  
50  
51  
52  
53  
54  
55  
56  
57  
58  
59  
60

## Sensitivity Analyses

Sensitivity analysis showed that if the probability of healing was reduced by 25%, from 70% to 53%, the mean NHS cost of wound care over 24 months would increase by 24% to an estimated £20,920 per wound. Conversely, if the probability of healing was increased by 25%, from 70% to 88%, the mean NHS cost of wound care over 24 months would decrease by 19% to an estimated £12,693 per wound.

If the number of hospital admissions changed by 25% below or above the base case value, the mean NHS cost of wound care over 24 months would vary by 14% from the mean value (range £14,591–19,257 per burn). However, if the number of hospital outpatient visits changed by 25% below or above the base case value, the mean NHS cost of wound care over 24 months would vary by 4% from the mean value (range £16,266–17,582 per burn) and if the number of general practice visits changed by 25% below or above the base case value, the mean NHS cost of wound care would vary by 3% from the mean value (range £16,412–17,436 per burn). If the unit cost of wound care products was decreased or increased by 25%, the mean NHS cost of wound care over 24 months would only vary by 1% from the mean value (range £16,684–17,164 per burn). Changes to other model inputs had a minimal impact on the mean NHS cost of wound care in clinical practice.

## DISCUSSION

This study aimed to investigate fire-related burns and scalds, hence those with a chemical or electric burn were excluded from the analysis. The study population of 260 adult patients with 294 evaluable burns may not necessarily be representative of the total adult population with a burn in the UK, given their significant number of co-morbidities. Nevertheless, this study provides a snapshot of how patients are managed across different services that has been difficult to ascertain from other published studies. Furthermore, the study raises questions about ‘burn wound chronicity’. There is a paucity of evidence on burn wound chronicity and it is not well recognised in the literature; in fact a Medline/Cinahl search for chronic burns wounds between 1980 and 2019 identified only 8 articles. All were written by surgeons, taking a surgical perspective to wound management or Marjolin’s ulcers of  $\geq 10$  years duration. The majority of the articles were from developing countries where delays in presentation and healing are common. Only one study assessed a chronic burn wound and the effect that biofilm may have on wound healing, but this was a single case study [34]. Even within these articles, the suggested treatments for chronic burn wounds were predominantly debridement, infection control, and promotion of granulation tissue [35]. This lack of identification of chronicity means that modern treatments, such as biofilm-based wound care, protease modulators, electrostimulation etc are not used routinely on non-healing burn wounds [36]. In the absence of published time to healing estimates for burn wounds in the UK, it is not possible to compare the healing outcomes in this retrospective study and to elucidate whether the estimated time to healing is extreme.

Notwithstanding this, the delayed time to healing could be due to either inadequate assessment and referral to specialist services, or lack of education around burn wound management and/or recognition and appropriate treatment of a chronic burn wound (i.e. some of the wounds could have become chronic in nature, but were continued to be treated as an acute burn wound). There is also the possibility that some nurses continued to treat the burn scar as a wound, which is sometimes seen in clinical practice. Since the depth was rarely documented in the records of this study’s patients, it is difficult to ascertain whether these burn wounds should all have healed by 3 weeks or should have had some surgical intervention within the first 3 weeks. Nevertheless, there is definitely a need for burns specialists to understand the pathophysiology of chronic wounds and apply the current up-to-date wound treatments to the chronic burn wound.

1  
2  
3 Burn injury can be one of the most severe forms of trauma and to achieve the best possible  
4 clinical outcome, burn care must be delivered by expert multi-disciplinary teams in specialised  
5 burns services [37]. In the UK there is significant variation in the way burns are managed and  
6 followed-up by burns services. Some services will regularly review the patient in their own  
7 clinics until the wound is healed, whereas other services will either teach patients to undertake  
8 self-care or utilise a shared-care model with either the community nursing team or practice  
9 nurses. Hence, very few patients with a burn wound are managed exclusively by practice  
10 nurses. The Authors were unable to verify from documentation in the patients' records which  
11 model of care was used for each patient and whether they were followed up by specialist  
12 services to full healing. Nevertheless, nearly all the patients in this study's cohort were jointly  
13 managed in both hospital outpatient clinics and by their general practice. It was interesting to  
14 note that wounds referred to specialist services seemed to take longer to heal, possibly due to  
15 them being deeper and larger injuries which were appropriately referred to specialist services.  
16 However, the burns managed by plastic surgery services took almost twice as long to heal and  
17 this could be due to the 'hub and spoke' arrangements in some parts of the UK (i.e. plastic  
18 surgeons who do not usually manage burns were seeing these wounds in satellite clinics with  
19 no support from burns or plastic surgery trained nurses or in services that predominantly only  
20 treat plastic surgery patients rather than burns). Of concern, in particular, is the time to healing  
21 of the wounds that were seen in burns clinics; whilst they managed to heal more patients (77%),  
22 the mean time to healing of 8.8 months probably relates back to the issues of not acknowledging  
23 burn wound chronicity and therefore amending treatments appropriately. Additionally, over  
24 the study's follow-up period of 24 months, 32% of all the burns resulted in a hospital admission.

25  
26  
27  
28  
29  
30  
31  
32  
33  
34  
35  
36  
37  
38  
39  
40  
41  
42  
43 Nonetheless, there was minimal evidence of a coordinated shared treatment plan between  
44 primary and secondary care. Documentation in the patients' records suggests that in the  
45 majority of instances, the dressings patients received in a hospital outpatient clinic were  
46 changed by clinicians in general practice and they would often be switched from a single to  
47 multiple dressings or no dressings at all. The goals of local burns wound management are the  
48 prevention of desiccation of viable tissue and control of bacteria through moist wound healing  
49 [38]. Hence, dressings removed by practice nurses are often reinstated in specialist clinics. One  
50 of the challenges to improving burns care in the community is the variable extent to which  
51 employers release and fund training and development of practice nurses [39]. Consequently,  
52 this study's wounds may have taken longer to heal if wound care was not the primary area of  
53 expertise of the nurses caring for these patients in the community. A series of Link Nurse  
54  
55  
56  
57  
58  
59  
60

1  
2  
3 Frameworks for burns has been developed across the Burn Operational Delivery Networks.  
4 However, despite their in-reach into both emergency departments and community nurses, very  
5 little impact has been made on practice nurses as access to these healthcare professionals has  
6 proved difficult [40]. Clearly, improving integration in management practices between  
7 secondary and primary care should lead to a better outcome for patients and would be cost-  
8 effective for the NHS.  
9  
10  
11  
12  
13  
14

15 The severity of a burn relates to both the depth of skin involvement and the percentage of the  
16 total body surface area (TBSA) involved [41]. Hence, the lack of documentation pertaining to  
17 diagnosis was particularly worrying. An estimated 63.2% of the records lacked a specific burn  
18 or scald location, depth and size, 34.7% only specified location but not depth and size and  
19 another 1.7% specified depth but not location and size. Consequently, any reporting system  
20 based on patients' records in primary care or the community would lead to an under-reporting  
21 and be inaccurate.  
22  
23  
24  
25  
26  
27  
28

29 The patients in this study seemed to have had significantly more comorbidities than the burn  
30 patients in the International Burn Injury Database [42], and that may have contributed to the  
31 length of time taken for their wounds to have healed. It is unusual for GPs to become involved  
32 with the management of a burn wound, and this may be due to this cohort being more at risk  
33 due to their comorbidities. Nevertheless, there is still an issue surrounding lack of burn care  
34 education among primary care clinicians. Moreover, 60% of all the burns in this cohort were  
35 considered to be infected or at risk of infection, based on documentation in the patients'  
36 records. Wound infections are one of the most serious problems that occur in the acute phase  
37 after a burn injury [43]. Several factors contribute to infection in burn wounds, notably the  
38 destruction of the skin barrier, the presence of necrosis and serosanguinous exudate, and  
39 impaired immune function [44]. Only superficial burn wounds will heal with minimal risk of  
40 infection; all other depths have the potential for colonisation and, thus, infection [43]. The risks  
41 are commensurate with the depth and extent of the burn, the health and age of the patient and  
42 local perfusion of the tissues. Local burn wound management is one of the most important  
43 aspects of burn therapy after the emergency treatment phase and can have considerable  
44 influence on time to healing [45]. For this reason, deeper wounds should always be managed  
45 with antimicrobials to prevent infection. Church *et al* 2006 argue that widespread application  
46 of an effective topical antimicrobial agent substantially reduces the microbial load on the open  
47 burn wound surface and reduces the risk of infection [46]. In the majority of burn units in the  
48  
49  
50  
51  
52  
53  
54  
55  
56  
57  
58  
59  
60

1  
2  
3 UK, antibiotics are not routinely administered prophylactically to burn patients because of  
4 concerns regarding antibiotic resistance, high cost, and the risk of adverse drug effects [44].  
5 However, they are routinely given to patients with burn injuries by either emergency  
6 departments or GPs as there is a lack of understanding of the normal inflammatory process of  
7 a burn. In this cohort, only 21% of all the burns were treated with an antimicrobial dressing at  
8 some point during the study's follow-up period. Consequently, the antimicrobial use may have  
9 been appropriate, but without adequate assessment of depth, a judgement cannot be made.  
10 Furthermore, there was no documentary evidence of 45% of patients ever having received a  
11 dressing for their wound, although there is no consensus on which agent or dressing is optimal  
12 for burn wound coverage to prevent or control infection or to enhance wound healing [47, 48].  
13  
14  
15  
16  
17  
18  
19  
20  
21

22 Resource use associated with managing a wound treated with antibiotics and/or antimicrobial  
23 dressings was found to be greater than that of a wound treated with neither, as the time to  
24 healing was longer. So too was resource use associated with managing the wounds that  
25 remained unhealed compared with those that went on to heal. Consequently, the cost of  
26 managing an unhealed wound was at least three times more than that of managing a healed  
27 wound (mean of £40,600 versus £12,000 per wound), and the cost of managing a wound not  
28 treated with antibiotics and/or antimicrobial dressings was at least 80% less than that of a  
29 wound treated with either. These findings are consistent with our Burden of Wounds study [3,  
30 4, 28]. The time to healing a wound is clearly an important factor in driving costs. Accordingly,  
31 the cost of burns wound management can be affected by a combination of resources required  
32 for dressing changes, complexity of some treatment regimens and infection. It is also  
33 noteworthy that the healing rate was higher among patients with a higher BMI, which was  
34 contrary to the healing rate among a cohort of patents with unhealed surgical wounds [26].  
35  
36  
37  
38  
39  
40  
41  
42  
43  
44  
45

46 This study provided insights into areas where improvements in clinical and service  
47 management could potentially enhance healing and other patient outcomes while reducing  
48 overall management costs. These are:  
49

- 51 • Working to common definitions and reporting standards across primary and secondary  
52 care.
  - 53 • Integrating care across providers.
  - 54 • Rational use of products with access to advanced wound treatments when necessary.
  - 55 • Recognising comorbidity management as appropriate.
- 56  
57  
58  
59  
60

1  
2  
3 In turn, with improved healing, these actions should reduce workload and associated healthcare  
4 resource use and lead to reductions in the overall cost of wound care. All healthcare systems  
5 recognise the importance of managing patients with burns and the relative risk of developing  
6 an infection. Clearly, training non-specialist nurses in the appropriate management of burns  
7 wound care is a prerequisite to overcoming some of the problems encountered in clinical  
8 practice and to achieving better health outcomes than those currently being observed.  
9

10  
11  
12  
13  
14  
15 Forty-six per cent of all the burns in this study had healed by 12 months from the time of the  
16 injury. In comparison, we previously estimated that 53% of venous leg ulcers (VLUs) [30],  
17 35% of diabetic foot ulcers (DFUs) [27], 50% of community-acquired pressure ulcers (PU)  
18 (ranging from 100% for category 1 ulcers to 21% for category 4 ulcers) [25] and 83% of  
19 surgical wounds [26] healed within 12 months from the onset of community management. The  
20 12-monthly cost of a wound that healed was £3,000, £2,100, £5,100 and £6,000 for a VLU,  
21 DFU, community-acquired PU and surgical wound respectively [26, 30, 27, 25], compared  
22 with £8,800 for a healed burn. Additionally, the 12-monthly cost of a wound that remained  
23 unhealed by 12 months was £13,500, £8,800, £12,300 and £13,700 for a VLU, DFU,  
24 community-acquired PU and surgical wound respectively [26, 30, 27, 25], compared with  
25 £26,700 for an unhealed burn. The higher burn-associated costs reflect the higher proportion  
26 of these injuries that result in a hospital admission and the majority of the burns being managed  
27 in both hospital outpatient clinics as well as by community-based teams. The Authors were  
28 unable to find any recent studies reporting the cost of managing adult burns in the UK. In one  
29 earlier study, the mean treatment cost over the 2011/12 financial year associated with patients  
30 allocated to different burn-specific healthcare resource groups ranged from £2,528 to £31,871  
31 (uprated to £3,088 and £36,074, respectively at 2017/18 prices) [49]. Comparison with our  
32 study may not be appropriate because of changes in patient management, hospital admission  
33 pathways and healthcare resource use over the intervening period. A systematic review of  
34 articles on burn-related costs published from 1950 to 2012 estimated the mean total healthcare  
35 cost per burn patient in high-income countries to be \$88,218 [£66,205] (range \$704-\$717,306  
36 [£536-£546,447]) [50]. However, comparisons are ineligible because of differences in  
37 methodological approaches, patient pathways and unit costs.  
38  
39  
40  
41  
42  
43  
44  
45  
46  
47  
48  
49  
50  
51  
52  
53  
54  
55  
56  
57  
58  
59  
60

## Study Limitations

The advantages and disadvantages of using patients' records in the THIN database for health economic studies in wound care have been previously discussed [3]. In summary, the advantage of using the database is that the patient pathways and associated resource use are based on real-world evidence derived from clinical practice. However, the analyses were based on clinicians' entries into their patients' records and inevitably subject to a certain amount of imprecision and lack of detail. Moreover, the computerised information in the database is collected by GPs and nursing teams for clinical care purposes and not for health economics research. Prescriptions issued by GPs and practice nurses are recorded in the database, but it does not specify whether the prescriptions were dispensed or detail patient compliance with the product. There may also be an under-recording of community-based clinician visits outside of the general practice. Despite these limitations, it is the authors' opinion that the real-world evidence contained in the THIN database has provided a useful perspective on the management of burns in clinical practice the UK and the associated costs.

The analysis was truncated at 24 months and does not consider the potential impact of those burns that remained unhealed beyond the study period. The analysis only considered NHS resource use and associated costs for the 'average patient' and was not stratified according to gender, comorbidities, disease-related factors and level of clinicians' skills. Costs incurred by non-NHS organisations (such as the provision of social care), patients' costs and indirect societal costs as a result of patients being absent from work were also excluded from the analysis.

## Conclusion

Due to incomplete documentation in the patients' records, it is difficult to say whether the time to healing was excessive or what other confounding factors may have contributed to the delayed healing. Nevertheless, this study indicates the need to educate general practice clinicians on the management and care of burns wounds. Furthermore, it is beholden on the burns community to determine how the poor healing rates can be improved. Clinical and economic benefits to both patients and the NHS could accrue from strategies that focus on improving documentation in patients' records, the integration of care between different providers, wound healing rates and reducing infection.



## REFERENCES

1. Brusselaers N, Monstrey S, Vogelaers D, Hoste E, Blot S. Severe burn injury in Europe: a systematic review of the incidence, etiology, morbidity, and mortality. *Crit Care*. 2010;14(5):R188. doi:10.1186/cc9300.
2. Nair CKV, Gopinath V, Ashok VG. Demographic and socio-cultural aspects of burns patients admitted in a tertiary care centre. *International Surgery Journal*. 2017;4(7):2170. doi:10.18203/2349-2902.isj20172618.
3. Guest JF, Ayoub N, McIlwraith T, Uchegbu I, Gerrish A, Weidlich D et al. Health economic burden that wounds impose on the National Health Service in the UK. *BMJ Open*. 2015;5(12):e009283. doi:10.1136/bmjopen-2015-009283.
4. Guest JF, Ayoub N, McIlwraith T, Uchegbu I, Gerrish A, Weidlich D et al. Health economic burden that different wound types impose on the UK's National Health Service. *Int Wound J*. 2016. doi:10.1111/iwj.12603.
5. NHS England. Hospital episode statistics: England. <https://digital.nhs.uk/data-and-information/publications/statistical/hospital-admitted-patient-care-activity>.
6. Peck M, Molnar J, Swart D. A global plan for burn prevention and care. *Bull World Health Organ*. 2009;87(10):802-3. doi:10.2471/blt.08.059733.
7. Mock C, Peck M, Peden M, Krug E, Ahuja R, Albertyn H et al. A WHO plan for burn prevention and care. Geneva: World Health Organization; 2008.
8. World Health Organization. Burns Fact Sheet. 2018. <https://www.who.int/news-room/fact-sheets/detail/burns>.
9. Atiyeh BS, Hayek SN, Gunn SW. New technologies for burn wound closure and healing--review of the literature. *Burns*. 2005;31(8):944-56. doi:10.1016/j.burns.2005.08.023.
10. International Best Practice Guidelines: Wound Management in Diabetic Foot Ulcers. *Wounds International*. In: *Wounds International*. 2013. [www.woundsinternational.com](http://www.woundsinternational.com).
11. Rowan MP, Cancio LC, Elster EA, Burmeister DM, Rose LF, Natesan S et al. Burn wound healing and treatment: review and advancements. *Crit Care*. 2015;19:243. doi:10.1186/s13054-015-0961-2.
12. Avita Medical RECELL® System Health Economic Data Project USD \$28 Million in Annual Savings at a Single Major Burn Center Versus Standard of Care., 2019. <https://www.biospace.com/article/releases/avita-medical-recell-system-health-economic-data-project-usd-28-million-in-annual-savings-at-a-single-major-burn-center-versus-standard-of-care/>.

- 1  
2  
3 13. Metzdorff MT. Evidence-based medicine: what it is, what it isn't, and are we practicing it?  
4 J Trauma Acute Care Surg. 2013;75(6):927-35. doi:10.1097/TA.0b013e3182932bac.  
5
- 6 14. Djulbegovic B, Elqayam S. Many faces of rationality: Implications of the great rationality  
7 debate for clinical decision-making. J Eval Clin Pract. 2017;23(5):915-22.  
8 doi:10.1111/jep.12788.  
9
- 10 15. Flores O, Stockton K, Roberts JA, Muller MJ, Paratz JD. The efficacy and safety of  
11 adrenergic blockade after burn injury: A systematic review and meta-analysis. J Trauma Acute  
12 Care Surg. 2016;80(1):146-55. doi:10.1097/TA.0000000000000887.  
13
- 14 16. Avni T, Levcovich A, Ad-El DD, Leibovici L, Paul M. Prophylactic antibiotics for burns  
15 patients: systematic review and meta-analysis. BMJ (Clinical research ed). 2010;340:c241.  
16 doi:10.1136/bmj.c241.  
17
- 18 17. Aziz Z, Abu SF, Chong NJ. A systematic review of silver-containing dressings and topical  
19 silver agents (used with dressings) for burn wounds. Burns. 2012;38(3):307-18.  
20 doi:10.1016/j.burns.2011.09.020.  
21
- 22 18. Klein MB, Goverman J, Hayden DL, Fagan SP, McDonald-Smith GP, Alexander AK et al.  
23 Benchmarking outcomes in the critically injured burn patient. Ann Surg. 2014;259(5):833-41.  
24 doi:10.1097/SLA.0000000000000438.  
25
- 26 19. Pereira C, Murphy K, Herndon D. Outcome measures in burn care. Is mortality dead?  
27 Burns. 2004;30(8):761-71. doi:10.1016/j.burns.2004.05.012.  
28
- 29 20. Holavanahalli RK, Helm PA, Kowalske KJ. Long-Term Outcomes in Patients Surviving  
30 Large Burns: The Musculoskeletal System. J Burn Care Res. 2016;37(4):243-54.  
31 doi:10.1097/BCR.0000000000000257.  
32
- 33 21. Blak BT, Thompson M, Dattani H, Bourke A. Generalisability of The Health Improvement  
34 Network (THIN) database: demographics, chronic disease prevalence and mortality rates.  
35 Inform Prim Care. 2011;19(4):251-5.  
36
- 37 22. Panca M, Cutting K, Guest JF. Clinical and cost-effectiveness of absorbent dressings in the  
38 treatment of highly exuding VLU. J Wound Care. 2013;22(3):109-18.  
39 doi:10.12968/jowc.2013.22.3.109.  
40
- 41 23. Guest JF, Gerrish A, Ayoub N, Vowden K, Vowden P. Clinical outcomes and cost-  
42 effectiveness of three alternative compression systems used in the management of venous leg  
43 ulcers. J Wound Care. 2015;24(7):300-8. doi:10.12968/jowc.2015.24.7.300.  
44
- 45 24. Guest JF, Fuller GW, Vowden P. Clinical outcomes and cost-effectiveness of three different  
46 compression systems in newly-diagnosed venous leg ulcers in the UK. J Wound Care.  
47 2017;26(5):244-54. doi:10.12968/jowc.2017.26.5.244.  
48  
49  
50  
51  
52  
53  
54  
55  
56  
57  
58  
59  
60

- 1  
2  
3 25. Guest JF, Fuller GW, Vowden P, Vowden KR. Cohort study evaluating pressure ulcer  
4 management in clinical practice in the UK following initial presentation in the community:  
5 costs and outcomes. *BMJ Open*. 2018;8(7):e021769. doi:10.1136/bmjopen-2018-021769.  
6  
7  
8 26. Guest JF, Fuller GW, Vowden P. Costs and outcomes in evaluating management of  
9 unhealed surgical wounds in the community in clinical practice in the UK: a cohort study. *BMJ*  
10 *Open*. 2018;8(12):e022591. doi:10.1136/bmjopen-2018-022591.  
11  
12 27. Guest JF, Fuller GW, Vowden P. Diabetic foot ulcer management in clinical practice in the  
13 UK: costs and outcomes. *Int Wound J*. 2018;15(1):43-52. doi:10.1111/iwj.12816.  
14  
15 28. Guest JF, Vowden K, Vowden P. The health economic burden that acute and chronic  
16 wounds impose on an average clinical commissioning group/health board in the UK. *J Wound*  
17 *Care*. 2017;26(6):292-303. doi:10.12968/jowc.2017.26.6.292.  
18  
19 29. Guest JF, Taylor RR, Vowden K, Vowden P. Relative cost-effectiveness of a skin  
20 protectant in managing venous leg ulcers in the UK. *J Wound Care*. 2012;21(8):389-98.  
21 doi:10.12968/jowc.2012.21.8.389.  
22  
23 30. Guest JF, Fuller GW, Vowden P. Venous leg ulcer management in clinical practice in the  
24 UK: costs and outcomes. *Int Wound J*. 2018;15(1):29-37. doi:10.1111/iwj.12814.  
25  
26 31. Curtis L, Burns A. Unit Costs of Health and Social Care 2018. University of Kent, Personal  
27 Social Services Research Unit, Canterbury. 2018. <https://kar.kent.ac.uk/70995/>. Accessed 25  
28 July 2019.  
29  
30 32. Department of Health. National Schedule of NHS reference costs 2017/18.  
31 <https://improvement.nhs.uk/resources/reference-costs/>. Accessed 25 July 2019.  
32  
33 33. Drug Tariff. Drug Tariff. 2018. <https://www.drugtariff.co.uk>. Accessed 25 July 2019.  
34  
35 34. Ramos-Gallardo G. Chronic Wounds in Burn Injury: A Case Report on Importance of  
36 Biofilms. *World J Plast Surg*. 2016;5(2):175-80.  
37  
38 35. Maher A. Establishing a consensus for the surgical management of chronic burn wounds:  
39 A randomised prospective comparative study. *Egypt J Plast Reconstr Surg*. 2009;33(1):31-7.  
40  
41 36. Edwards J. Burn Wound Chronicity – myth or reality? . *Wounds UK*. 2013;9(3):4-5.  
42  
43 37. Al-Mousawi AM, Mecott-Rivera GA, Jeschke MG, Herndon DN. Burn teams and burn  
44 centers: the importance of a comprehensive team approach to burn care. *Clin Plast Surg*.  
45 2009;36(4):547-54. doi:10.1016/j.cps.2009.05.015.  
46  
47 38. Wounds International. International Best Practice Guidelines: Effective skin and wound  
48 management of non-complex burns. . 2016.  
49 [https://www.woundsinternational.com/resources/details/best-practice-guidelines-effective-](https://www.woundsinternational.com/resources/details/best-practice-guidelines-effective-skin-and-wound-management-in-non-complex-burns)  
50 [skin-and-wound-management-in-non-complex-burns](https://www.woundsinternational.com/resources/details/best-practice-guidelines-effective-skin-and-wound-management-in-non-complex-burns).  
51  
52  
53  
54  
55  
56  
57  
58  
59  
60

- 1  
2  
3  
4  
5  
6  
7  
8  
9  
10  
11  
12  
13  
14  
15  
16  
17  
18  
19  
20  
21  
22  
23  
24  
25  
26  
27  
28  
29  
30  
31  
32  
33  
34  
35  
36  
37  
38  
39  
40  
41  
42  
43  
44  
45  
46  
47  
48  
49  
50  
51  
52  
53  
54  
55  
56  
57  
58  
59  
60
39. The Queen's Nursing Institute. General Practice Nursing in the 21st Century: A Time of Opportunity. 2016. [https://www.qni.org.uk/wp-content/uploads/2016/09/gpn\\_c21\\_report.pdf](https://www.qni.org.uk/wp-content/uploads/2016/09/gpn_c21_report.pdf).
40. Edwards J. Developing a burns link nurse framework for minor burn management. *Wounds UK*. 2013;9(3):10-3.
41. Benson A, Dickson WA, Boyce DE. Burns. *BMJ (Clinical research ed)*. 2006;332(7542):649-52. doi:10.1136/bmj.332.7542.649.
42. Stylianou N, Buchan I, Dunn KW. A review of the international Burn Injury Database (iBID) for England and Wales: descriptive analysis of burn injuries 2003-2011. *BMJ Open*. 2015;5(2):e006184. doi:10.1136/bmjopen-2014-006184.
43. Edwards J. Use of Silvercel Non-Adherent on burn wounds: a case series. *Wounds UK* 2013. 2013;9:81-4.
44. Edwards-Jones V, Greenwood JE. What's new in burn microbiology? *Burns*. 2003;29(1):15-24. doi:10.1016/s0305-4179(02)00203-6.
45. Atiyeh BS, Ibrahim A, Hayek S, N. . Burn wound cleansing: an efficient evidence-based treatment modality or a ritualistic practice. *J Wound Technol* 2010;7:6-10.
46. Church D, Elsayed S, Reid O, Winston B, Lindsay R. Burn wound infections. *Clin Microbiol Rev*. 2006;19(2):403-34. doi:10.1128/CMR.19.2.403-434.2006.
47. Wasiak J, Cleland H, Campbell F, Spinks A. Dressings for superficial and partial thickness burns. *Cochrane Database Syst Rev*. 2013(3):CD002106. doi:10.1002/14651858.CD002106.pub4.
48. Norman G, Christie J, Liu Z, Westby MJ, Jefferies JM, Hudson T et al. Antiseptics for burns. *Cochrane Database Syst Rev*. 2017;7:CD011821. doi:10.1002/14651858.CD011821.pub2.
49. Jeevan R, Rashid A, Lymperopoulos NS, Wilkinson D, James MI. Mortality and treatment cost estimates for 1075 consecutive patients treated by a regional adult burn service over a five year period: the Liverpool experience. *Burns*. 2014;40(2):214-22. doi:10.1016/j.burns.2013.11.020.
50. Hop MJ, Polinder S, van der Vlies CH, Middelkoop E, van Baar ME. Costs of burn care: a systematic review. *Wound Repair Regen*. 2014;22(4):436-50. doi:10.1111/wrr.12189.

**Table 1. Patients' baseline characteristics (n=260 adult patients).**

|                                                    |       |
|----------------------------------------------------|-------|
| Mean age at time of presentation (years)           | 57.8  |
| Percentage female                                  | 61%   |
| Mean systolic blood pressure (mm Hg)               | 131.4 |
| Mean diastolic blood pressure (mm Hg)              | 75.8  |
| Mean body mass index (BMI) (kg/m <sup>2</sup> )    | 30.2  |
| Percentage with BMI <20.0kg/m <sup>2</sup>         | 7%    |
| Percentage with BMI ≥30.0kg/m <sup>2</sup>         | 41%   |
| Percentage who were current smokers                | 24%   |
| Percentage who were ex-smokers                     | 22%   |
| Percentage who were non-smokers                    | 54%   |
| <b>Percentage with the following comorbidities</b> |       |
| Musculoskeletal                                    | 72%   |
| Cardiovascular                                     | 64%   |
| Endocrinological                                   | 50%   |
| Respiratory                                        | 45%   |
| Dermatological                                     | 43%   |
| Psychiatric                                        | 40%   |
| Gastroenterological                                | 37%   |
| Neurological                                       | 29%   |
| Genito-urinary                                     | 20%   |
| Renal                                              | 20%   |
| Oncological                                        | 19%   |
| Ophthalmological                                   | 16%   |
| Immunological                                      | 10%   |
| Haematological                                     | 5%    |
| <b>Percentage with the following burns</b>         |       |
| Unspecified location and depth                     | 58.8% |
| Hand (unspecified depth)                           | 12.9% |
| Lower limb (unspecified depth)                     | 9.2%  |
| Upper limb (unspecified depth)                     | 7.5%  |
| Scald of unspecified location and depth            | 4.4%  |
| Trunk (unspecified depth)                          | 3.4%  |
| Face, head or neck (unspecified depth)             | 1.7%  |
| Partial depth (unspecified location)               | 1.4%  |
| Full depth (unspecified location)                  | 0.3%  |

**Table 2: Health care resource use associated with managing burns in clinical practice (n=294 burns).**

| <b>Resource</b>                                                    | <b>Resource use over 24 months<br/>from initial presentation</b> |                                 |
|--------------------------------------------------------------------|------------------------------------------------------------------|---------------------------------|
|                                                                    | <b>Percentage of burns</b>                                       | <b>Mean number<br/>per burn</b> |
| Practice nurse visits                                              | 98%                                                              | 54.8                            |
| GP visits                                                          | 97%                                                              | 23.5                            |
| Outpatient clinic visits                                           | 91%                                                              | 22.2                            |
| District nurse visits                                              | 18%                                                              | 1.9                             |
| Accident & emergency attendances                                   | 34%                                                              | 1.9                             |
| Hospital admissions                                                | 28%                                                              | 0.9                             |
| Surgical admissions                                                | 4%                                                               | 0.05                            |
| Dressings                                                          | 55%                                                              | 457.8                           |
| Single dressings                                                   | 14%                                                              | 128.3                           |
| Multiple dressings                                                 | 41%                                                              | 672.0                           |
| Prescriptions for analgesics and non-steroidal anti-inflammatories | 68%                                                              | 8.7                             |

**Table 3: Prescribed dressings documented in the patients’ records (n=294 burns).**

| Percentage of burns that were treated with the following dressing: |           |          |               |                  |      |              |          |               |                 |       |           |              |
|--------------------------------------------------------------------|-----------|----------|---------------|------------------|------|--------------|----------|---------------|-----------------|-------|-----------|--------------|
| Month of treatment                                                 | Absorbent | Alginate | Antimicrobial | Capillary-action | Foam | Hydrocolloid | Hydrogel | Low-adherence | Odour absorbent | Other | Permeable | Soft polymer |
| 1                                                                  | 12%       | 1%       | 6%            | 0%               | 6%   | 5%           | 1%       | 7%            | 0%              | 45%   | 9%        | 13%          |
| 2                                                                  | 3%        | 4%       | 3%            | 2%               | 4%   | 7%           | 4%       | 3%            | 2%              | 24%   | 1%        | 7%           |
| 3                                                                  | 8%        | 1%       | 3%            | 1%               | 5%   | 1%           | 5%       | 3%            | 1%              | 6%    | 2%        | 5%           |
| 4                                                                  | 5%        | 8%       | 3%            | 3%               | 3%   | 5%           | 2%       | 4%            | 2%              | 7%    | 3%        | 3%           |
| 5                                                                  | 4%        | 1%       | 4%            | 0%               | 8%   | 3%           | 4%       | 4%            | 5%              | 8%    | 1%        | 6%           |
| 6                                                                  | 5%        | 0%       | 1%            | 2%               | 3%   | 6%           | 1%       | 5%            | 0%              | 8%    | 3%        | 6%           |
| 7                                                                  | 7%        | 0%       | 1%            | 1%               | 9%   | 1%           | 3%       | 3%            | 2%              | 6%    | 3%        | 4%           |
| 8                                                                  | 4%        | 3%       | 2%            | 0%               | 2%   | 4%           | 1%       | 5%            | 1%              | 5%    | 1%        | 4%           |
| 9                                                                  | 4%        | 1%       | 5%            | 1%               | 2%   | 3%           | 4%       | 2%            | 3%              | 2%    | 3%        | 5%           |
| 10                                                                 | 6%        | 3%       | 3%            | 2%               | 3%   | 2%           | 2%       | 7%            | 0%              | 8%    | 1%        | 5%           |
| 11                                                                 | 4%        | 3%       | 5%            | 0%               | 7%   | 2%           | 2%       | 4%            | 5%              | 9%    | 4%        | 2%           |
| 12                                                                 | 5%        | 0%       | 7%            | 3%               | 3%   | 5%           | 2%       | 3%            | 1%              | 8%    | 1%        | 6%           |
| 13                                                                 | 6%        | 3%       | 3%            | 3%               | 3%   | 3%           | 3%       | 3%            | 1%              | 8%    | 3%        | 2%           |
| 14                                                                 | 9%        | 0%       | 8%            | 0%               | 3%   | 3%           | 1%       | 4%            | 1%              | 8%    | 3%        | 3%           |
| 15                                                                 | 5%        | 5%       | 1%            | 6%               | 0%   | 3%           | 1%       | 4%            | 3%              | 8%    | 3%        | 8%           |
| 16                                                                 | 5%        | 2%       | 7%            | 0%               | 3%   | 2%           | 0%       | 6%            | 1%              | 6%    | 5%        | 5%           |
| 17                                                                 | 9%        | 6%       | 3%            | 3%               | 6%   | 6%           | 0%       | 4%            | 2%              | 9%    | 9%        | 6%           |
| 18                                                                 | 7%        | 5%       | 9%            | 0%               | 8%   | 1%           | 4%       | 3%            | 4%              | 7%    | 2%        | 7%           |
| 19                                                                 | 5%        | 1%       | 7%            | 5%               | 2%   | 8%           | 0%       | 7%            | 1%              | 9%    | 2%        | 7%           |
| 20                                                                 | 8%        | 1%       | 5%            | 2%               | 7%   | 2%           | 5%       | 3%            | 3%              | 7%    | 3%        | 6%           |
| 21                                                                 | 5%        | 4%       | 5%            | 0%               | 4%   | 7%           | 0%       | 9%            | 2%              | 6%    | 1%        | 10%          |
| 22                                                                 | 8%        | 0%       | 5%            | 1%               | 1%   | 3%           | 5%       | 3%            | 8%              | 13%   | 5%        | 4%           |
| 23                                                                 | 12%       | 3%       | 7%            | 4%               | 6%   | 3%           | 3%       | 15%           | 1%              | 11%   | 4%        | 12%          |
| 24                                                                 | 6%        | 5%       | 8%            | 0%               | 10%  | 6%           | 0%       | 5%            | 3%              | 21%   | 16%       | 8%           |

**Table 4: Cost of health care resource use associated with managing burns (n=294) in clinical practice at 2017/18 prices (percentage of total cost is in parenthesis).**

| Resource                                                           | Mean cost of resource use per burn over 24 months from initial presentation |               |                   |               |                   |               |
|--------------------------------------------------------------------|-----------------------------------------------------------------------------|---------------|-------------------|---------------|-------------------|---------------|
|                                                                    | All burns                                                                   |               | Healed burns      |               | Unhealed burns    |               |
| Medical admissions (no surgery)                                    | £8,879.70                                                                   | (52%)         | £6,292.18         | (52%)         | £21,347.72        | (53%)         |
| Outpatient visits                                                  | £2,601.60                                                                   | (15%)         | £1,931.91         | (16%)         | £5,897.84         | (15%)         |
| GP visits                                                          | £2,004.80                                                                   | (12%)         | £1,501.41         | (13%)         | £4,488.47         | (11%)         |
| Practice nurse visits                                              | £1,314.30                                                                   | (8%)          | £975.89           | (8%)          | £2,976.36         | (7%)          |
| Dressings                                                          | £850.00                                                                     | (5%)          | £462.60           | (4%)          | £2,573.34         | (6%)          |
| Surgical admissions                                                | £524.70                                                                     | (3%)          | £323.42           | (3%)          | £1,449.60         | (4%)          |
| Accident & emergency                                               | £318.00                                                                     | (2%)          | £228.31           | (2%)          | £752.81           | (2%)          |
| Community nurse visits                                             | £117.40                                                                     | (1%)          | £59.69            | (0%)          | £356.33           | (1%)          |
| Bandages                                                           | £120.40                                                                     | (1%)          | £76.82            | (1%)          | £322.52           | (1%)          |
| Prescriptions for analgesics and non-steroidal anti-inflammatories | £150.90                                                                     | (1%)          | £119.37           | (1%)          | £313.96           | (1%)          |
| Other wound care products                                          | £34.70                                                                      | (0%)          | £25.11            | (0%)          | £81.35            | (0%)          |
| Ambulance                                                          | £5.70                                                                       | (0%)          | £4.80             | (0%)          | £10.75            | (0%)          |
| Laboratory tests                                                   | £1.70                                                                       | (0%)          | £0.82             | (0%)          | £5.61             | (0%)          |
| <b>TOTAL</b>                                                       | <b>£16,923.90</b>                                                           | <b>(100%)</b> | <b>£12,002.33</b> | <b>(100%)</b> | <b>£40,576.66</b> | <b>(100%)</b> |



**Table 5: Cost of Wound Care Stratified by Infection Management.**

|                                                                           | <b>Percentage<br/>of cohort</b> | <b>Percentage<br/>healed</b> | <b>Time to healing<br/>(months)</b> | <b>Mean cost<br/>of care</b> |
|---------------------------------------------------------------------------|---------------------------------|------------------------------|-------------------------------------|------------------------------|
| No evidence of having received antibiotics and/or antimicrobial dressings | 40%                             | 69%                          | 3.4                                 | £4,379                       |
| Recorded as having received antibiotics and/or antimicrobial dressings    | 60%                             | 66%                          | 11.2                                | £26,671                      |
| Recorded as having received only antibiotics                              | 43%                             | 71%                          | 10.7                                | £24,396                      |
| Recorded as having received only antimicrobial dressings                  | 4%                              | 50%                          | 5.1                                 | £12,606                      |
| Recorded as having received antibiotics and antimicrobial dressings       | 13%                             | 48%                          | 12.9                                | £38,406                      |

**Table 6: Cost of Wound Care Stratified by Body Mass Index.**

|           | <b>% of patients</b> | <b>% healed</b> | <b>NHS cost per patient</b> |
|-----------|----------------------|-----------------|-----------------------------|
| BMI <20   | 7%                   | 55%             | £9,411                      |
| BMI 20-29 | 41%                  | 66%             | £11,485                     |
| BMI 30-35 | 27%                  | 74%             | £15,143                     |
| BMI >35   | 20%                  | 83%             | £20,049                     |

1  
2  
3 **Figure 1: Wound Healing**  
4

5 **Figure 2: Patients who Received Multiple Dressings.**  
6

7  
8 **Figure 3: Monthly NHS Cost of Wound Care at 2017/18 Prices.**  
9

10 **Figure 4: Kaplan Meier Analysis of Infection.**  
11

12 **Figure 5. Kaplan Meier Analysis of Body Mass Index.**  
13  
14  
15  
16  
17  
18  
19  
20  
21  
22  
23  
24  
25  
26  
27  
28  
29  
30  
31  
32  
33  
34  
35  
36  
37  
38  
39  
40  
41  
42  
43  
44  
45  
46  
47  
48  
49  
50  
51  
52  
53  
54  
55  
56  
57  
58  
59  
60

For peer review only

1  
2  
3  
4  
5  
6  
7  
8  
9  
10  
11  
12  
13  
14  
15  
16  
17  
18  
19  
20  
21  
22  
23  
24  
25  
26  
27  
28  
29  
30  
31  
32  
33  
34  
35  
36  
37  
38  
39  
40  
41  
42  
43  
44  
45  
46  
47  
48  
49  
50  
51  
52  
53  
54  
55  
56  
57  
58  
59  
60

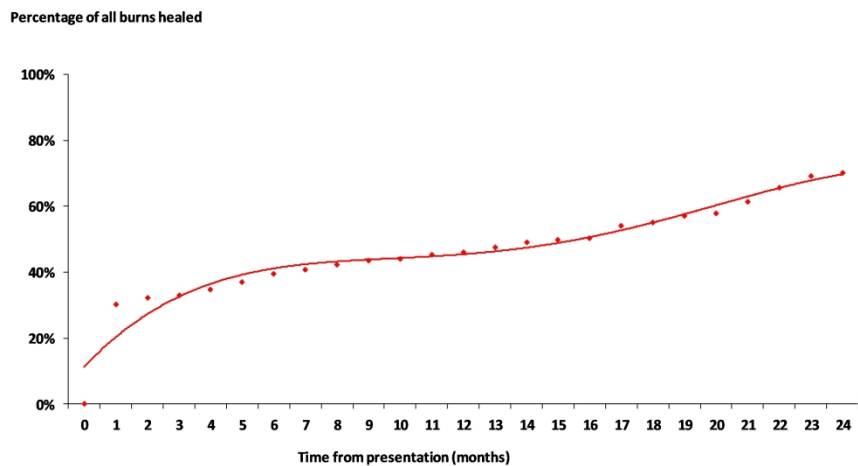

Figure 1

275x190mm (336 x 336 DPI)

1  
2  
3  
4  
5  
6  
7  
8  
9  
10  
11  
12  
13  
14  
15  
16  
17  
18  
19  
20  
21  
22  
23  
24  
25  
26  
27  
28  
29  
30  
31  
32  
33  
34  
35  
36  
37  
38  
39  
40  
41  
42  
43  
44  
45  
46  
47  
48  
49  
50  
51  
52  
53  
54  
55  
56  
57  
58  
59  
60

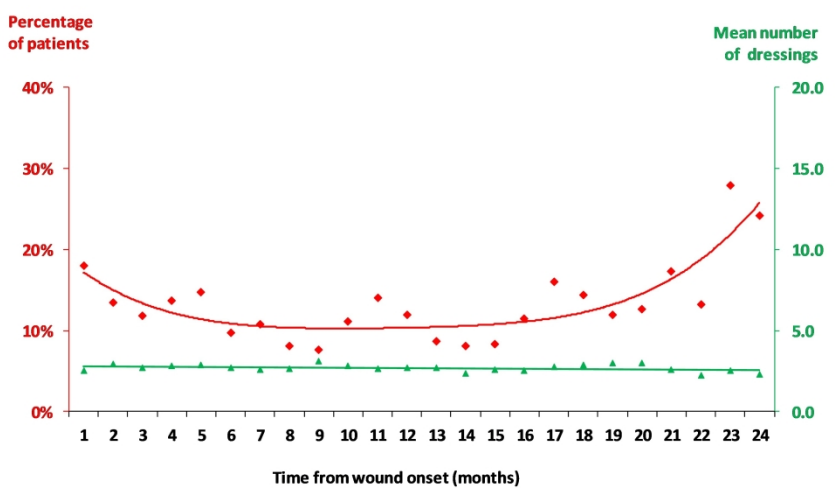

Figure 2

275x190mm (336 x 336 DPI)

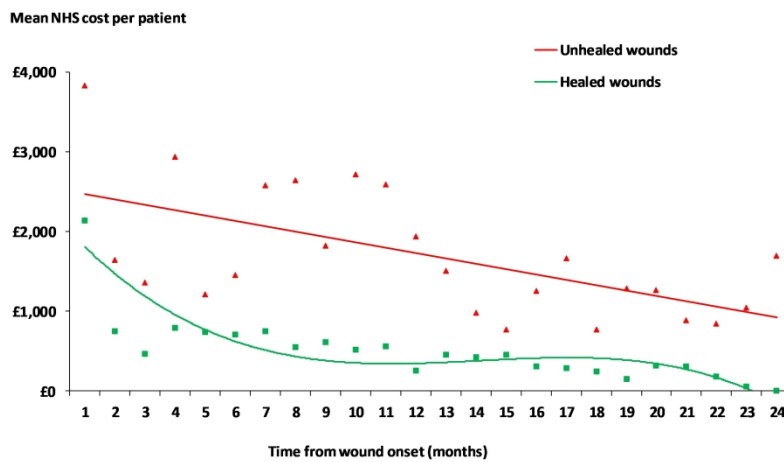

Figure 3

275x190mm (336 x 336 DPI)

1  
2  
3  
4  
5  
6  
7  
8  
9  
10  
11  
12  
13  
14  
15  
16  
17  
18  
19  
20  
21  
22  
23  
24  
25  
26  
27  
28  
29  
30  
31  
32  
33  
34  
35  
36  
37  
38  
39  
40  
41  
42  
43  
44  
45  
46  
47  
48  
49  
50  
51  
52  
53  
54  
55  
56  
57  
58  
59  
60

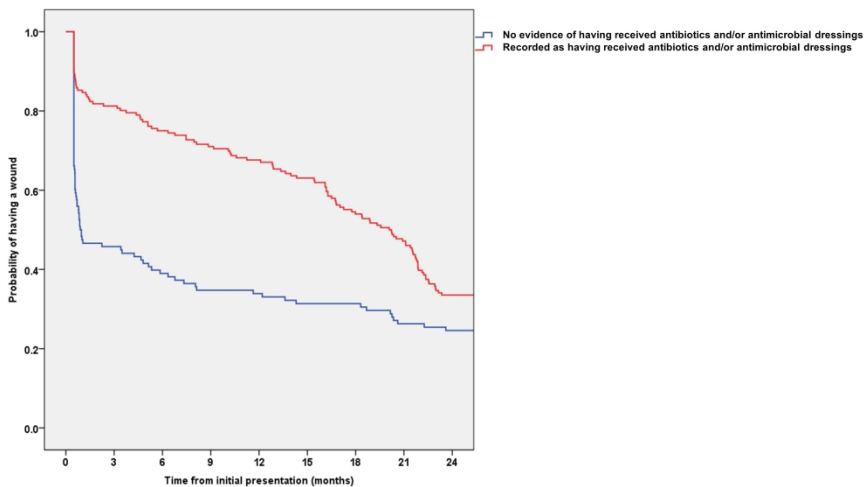

Figure 4

275x190mm (336 x 336 DPI)

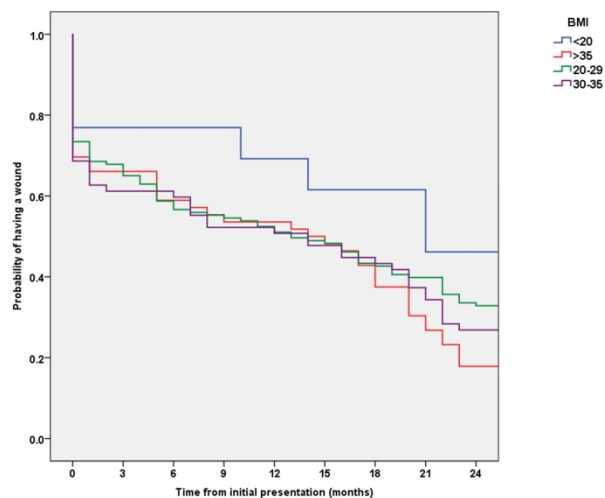

Figure 5

275x190mm (336 x 336 DPI)



STROBE Statement—Checklist of items that should be included in reports of *cohort studies*

| Section/Topic            | Item # | Recommendation                                                                                                                                                                                    | Reported on page # |
|--------------------------|--------|---------------------------------------------------------------------------------------------------------------------------------------------------------------------------------------------------|--------------------|
| Title and abstract       | 1      | (a) Indicate the study's design with a commonly used term in the title or the abstract                                                                                                            | 1,8                |
|                          |        | (b) Provide in the abstract an informative and balanced summary of what was done and what was found                                                                                               | 1                  |
| <b>Introduction</b>      |        |                                                                                                                                                                                                   |                    |
| Background/rationale     | 2      | Explain the scientific background and rationale for the investigation being reported                                                                                                              | 6                  |
| Objectives               | 3      | State specific objectives, including any prespecified hypotheses                                                                                                                                  | 6,7                |
| <b>Methods</b>           |        |                                                                                                                                                                                                   |                    |
| Study design             | 4      | Present key elements of study design early in the paper                                                                                                                                           | 8                  |
| Setting                  | 5      | Describe the setting, locations, and relevant dates, including periods of recruitment, exposure, follow-up, and data collection                                                                   | 8,9                |
| Participants             | 6      | (a) Give the eligibility criteria, and the sources and methods of selection of participants. Describe methods of follow-up                                                                        | 8,9                |
|                          |        | (b) For matched studies, give matching criteria and number of exposed and unexposed                                                                                                               |                    |
| Variables                | 7      | Clearly define all outcomes, exposures, predictors, potential confounders, and effect modifiers. Give diagnostic criteria, if applicable                                                          | 8,9                |
| Data sources/measurement | 8*     | For each variable of interest, give sources of data and details of methods of assessment (measurement). Describe comparability of assessment methods if there is more than one group              | 8,9                |
| Bias                     | 9      | Describe any efforts to address potential sources of bias                                                                                                                                         | 9,10               |
| Study size               | 10     | Explain how the study size was arrived at                                                                                                                                                         | 9                  |
| Quantitative variables   | 11     | Explain how quantitative variables were handled in the analyses. If applicable, describe which groupings were chosen and why                                                                      | 9,10               |
| Statistical methods      | 12     | (a) Describe all statistical methods, including those used to control for confounding                                                                                                             | 10                 |
|                          |        | (b) Describe any methods used to examine subgroups and interactions                                                                                                                               | 10                 |
|                          |        | (c) Explain how missing data were addressed                                                                                                                                                       | N/A                |
|                          |        | (d) If applicable, explain how loss to follow-up was addressed                                                                                                                                    | N/A                |
|                          |        | (e) Describe any sensitivity analyses                                                                                                                                                             | 10                 |
| <b>Results</b>           |        |                                                                                                                                                                                                   |                    |
| Participants             | 13*    | (a) Report numbers of individuals at each stage of study—eg numbers potentially eligible, examined for eligibility, confirmed eligible, included in the study, completing follow-up, and analysed | 11                 |
|                          |        | (b) Give reasons for non-participation at each stage                                                                                                                                              | N/A                |
|                          |        | (c) Consider use of a flow diagram                                                                                                                                                                | N/A                |

|                          |     |                                                                                                                                                                                                              |                      |
|--------------------------|-----|--------------------------------------------------------------------------------------------------------------------------------------------------------------------------------------------------------------|----------------------|
| Descriptive data         | 14* | (a) Give characteristics of study participants (eg demographic, clinical, social) and information on exposures and potential confounders                                                                     | 11,26                |
|                          |     | (b) Indicate number of participants with missing data for each variable of interest                                                                                                                          | N/A                  |
|                          |     | (c) Summarise follow-up time (eg, average and total amount)                                                                                                                                                  | 11,12                |
| Outcome data             | 15* | Report numbers of outcome events or summary measures over time                                                                                                                                               | 11,26<br>Figures 1-5 |
| Main results             | 16  | (a) Give unadjusted estimates and, if applicable, confounder-adjusted estimates and their precision (eg, 95% confidence interval). Make clear which confounders were adjusted for and why they were included | 11-14<br>27-31       |
|                          |     | (b) Report category boundaries when continuous variables were categorized                                                                                                                                    | N/A                  |
|                          |     | (c) If relevant, consider translating estimates of relative risk into absolute risk for a meaningful time period                                                                                             | N/A                  |
| Other analyses           | 17  | Report other analyses done—eg analyses of subgroups and interactions, and sensitivity analyses                                                                                                               | 13,14,30,31          |
| <b>Discussion</b>        |     |                                                                                                                                                                                                              |                      |
| Key results              | 18  | Summarise key results with reference to study objectives                                                                                                                                                     | 15-19                |
| Limitations              | 19  | Discuss limitations of the study, taking into account sources of potential bias or imprecision. Discuss both direction and magnitude of any potential bias                                                   | 15-20                |
| Interpretation           | 20  | Give a cautious overall interpretation of results considering objectives, limitations, multiplicity of analyses, results from similar studies, and other relevant evidence                                   | 15-19                |
| Generalisability         | 21  | Discuss the generalisability (external validity) of the study results                                                                                                                                        | 15-19                |
| <b>Other information</b> |     |                                                                                                                                                                                                              |                      |
| Funding                  | 22  | Give the source of funding and the role of the funders for the present study and, if applicable, for the original study on which the present article is based                                                | 3                    |

\*Give information separately for exposed and unexposed groups.

**Note:** An Explanation and Elaboration article discusses each checklist item and gives methodological background and published examples of transparent reporting. The STROBE checklist is best used in conjunction with this article (freely available on the Web sites of PLoS Medicine at <http://www.plosmedicine.org/>, Annals of Internal Medicine at <http://www.annals.org/>, and Epidemiology at <http://www.epidem.com/>). Information on the STROBE Initiative is available at <http://www.strobe-statement.org>.
